# Supplementary material for: Processes in DNA damage response from a whole-cell multi-omics perspective
Source: PubMed Central journal article supplement — iScience. 2022 Oct 19;25(11):105341. doi: 10.1016/j.isci.2022.105341 (PMC9633746; doi:10.1016/j.isci.2022.105341), 2022-10-19
Supplement: mmc1.pdf [file mmc1.pdf]

**iScience, Volume 25**

## **Supplemental information**

**Processes in DNA damage**

**response from a whole-cell**

**multi-omics perspective**

**James C. Pino, Alexander L.R. Lubbock, Leonard A. Harris, Danielle B. Gutierrez, Melissa A. Farrow, Nicole Muszynski, Tina Tsui, Stacy D. Sherrod, Jeremy L. Norris, John A. McLean, Richard M. Caprioli, John P. Wikswo, and Carlos F. Lopez**

# Processes in DNA-damage response from a whole-cell multi-omics perspective

## 1 Supplementary Information

### Jupyter Notebooks

|                              |   |                                                               |
|------------------------------|---|---------------------------------------------------------------|
|                              | : | <code>_notebook_1_data_exploration.pdf</code>                 |
| <code>exploration.pdf</code> | : | <code>_notebook_2_network_creation_and_exploration.pdf</code> |
|                              | : | <code>_notebook_3_enrichment_analysis.pdf</code>              |
|                              | : | <code>_notebook_4_agm.pdf</code>                              |

contains the example workflow to generate AGN.

### 1.2 Animations and Videos

- **Supplementary File S5:** `supplement_agm_trajectory.gif`  
Network demonstrating aggregation of ontology terms performed at each time point (time-series animation). The area of each node is proportional to the enrichment of that ontology term at the indicated time point. The thickness of edges is related to the number of edges connecting the molecular nodes underlying the two term nodes (not time-dependent).

## 2 Supplementary Figures

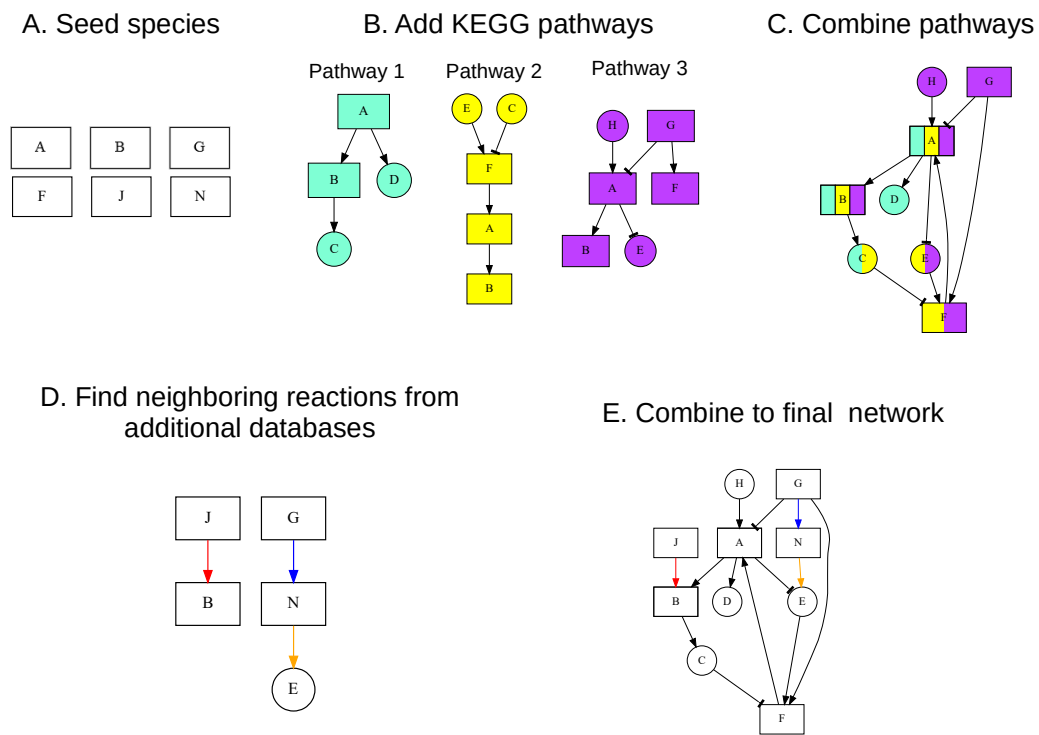

**Supplementary Fig. S1: Construction of data-seeded network.** Related to Figure 2. Example set of seed species to build network: (a) User provides seed species list; (b) KEGG pathways containing seed species are downloaded and merged; (c) Edges between seed species and nodes added by the KEGG pathways are identified; (d) All nodes and edges are combined into a single network, (e).

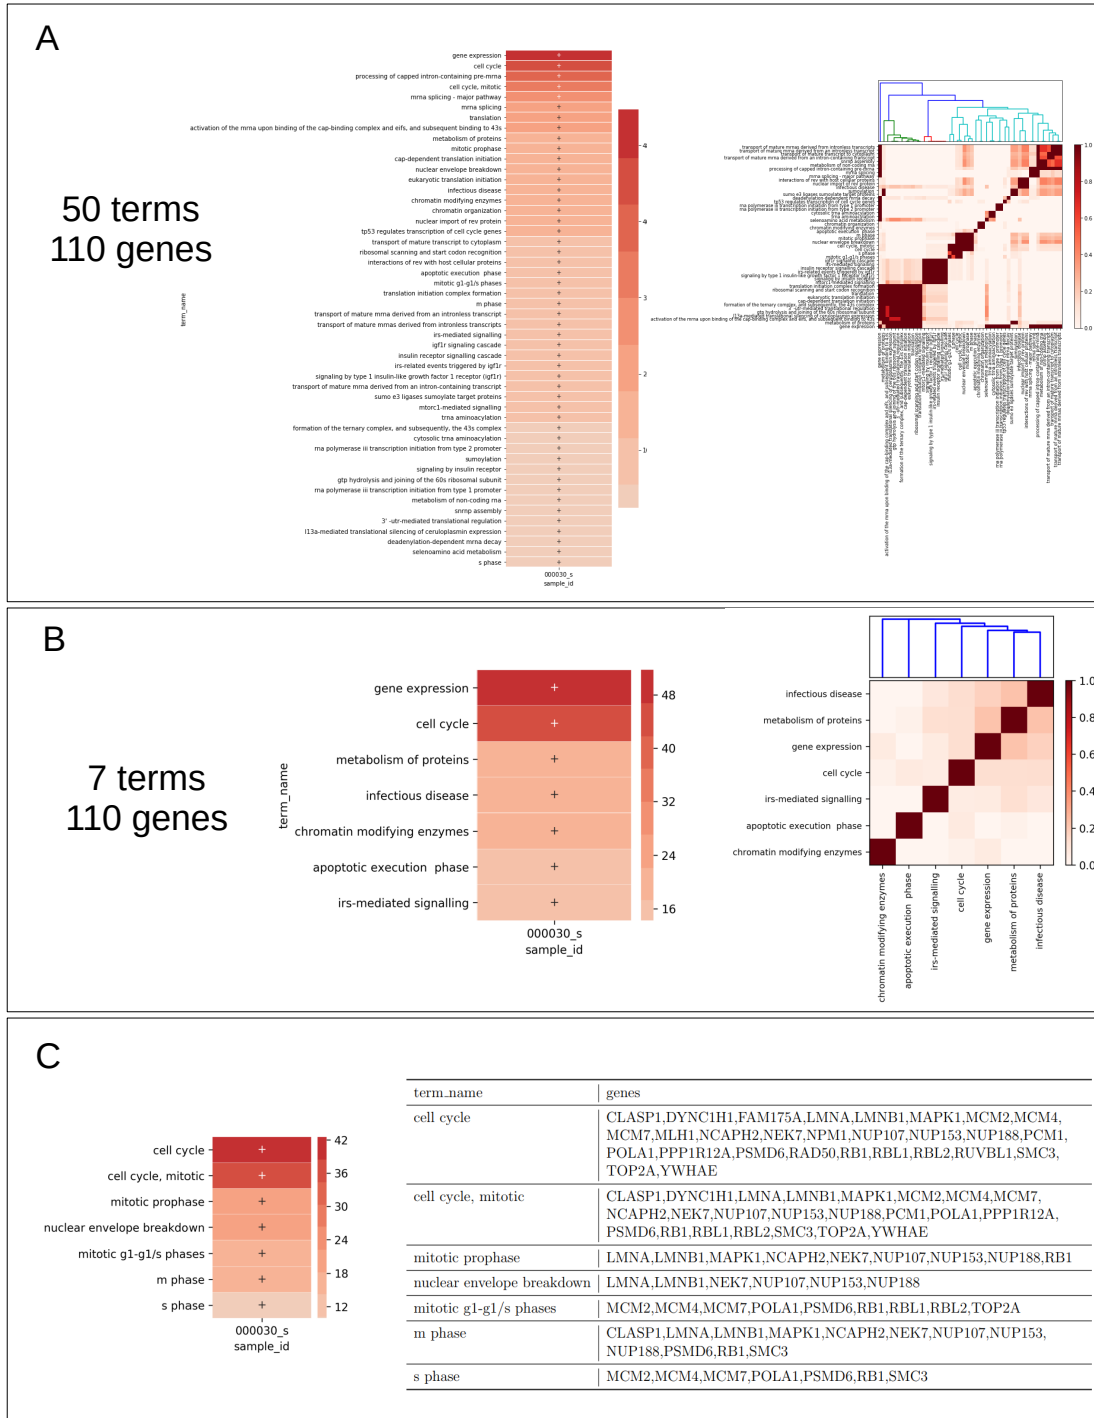

**Supplementary Fig. S2: Demonstration of enrichment compression** Related to Figure 4. A. Top 50 terms from Reactome for the 30 second pH<sub>SILAC</sub> timepoint. The left figure shows the terms and their enriched values while the right shows the Jaccard index between all pairs. B. After filtering based on Jaccard index similarity. The resulting left figure has 7 terms, retaining all 110 genes that were contained in the terms from A. The right figure demonstrates that we have minimal overlap between corresponding terms. C. Demonstration of the collapsing of terms to a parent term. The left shows all terms that were collapsed from the term “cell cycle”. The table on the right provides the genes that make up each term. Note that if a term was too broad (“cell cycle”), the user could remove it and repeat the process to maintain the level of detail which they require.

Data

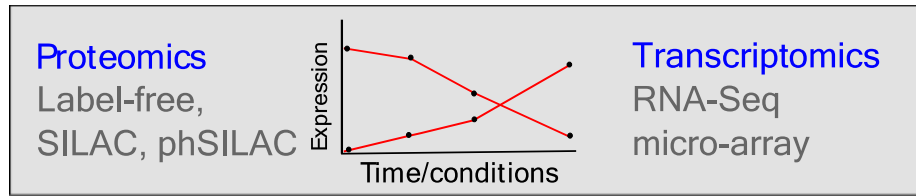

Enrichment  
Analysis

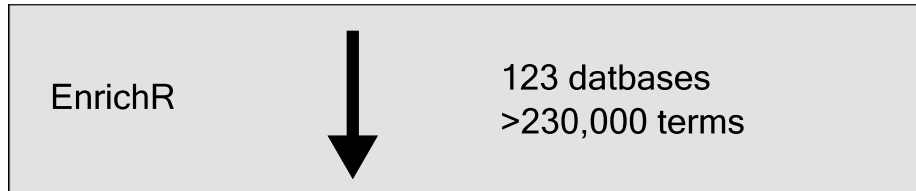

Enriched  
Terms

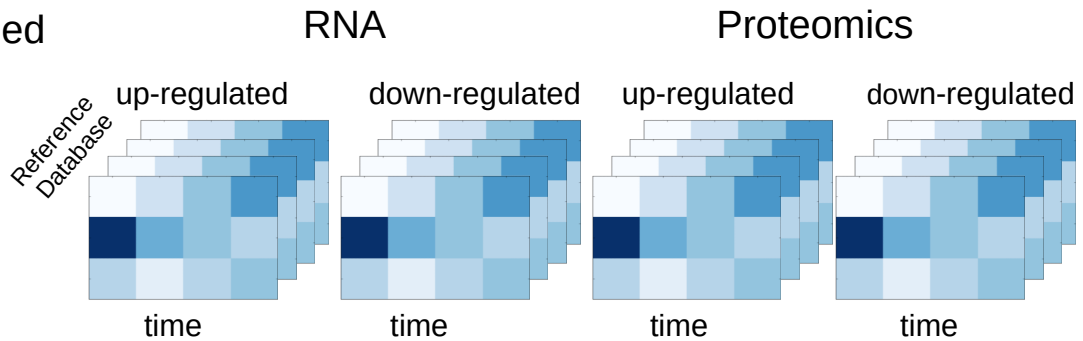

Term  
Exploration

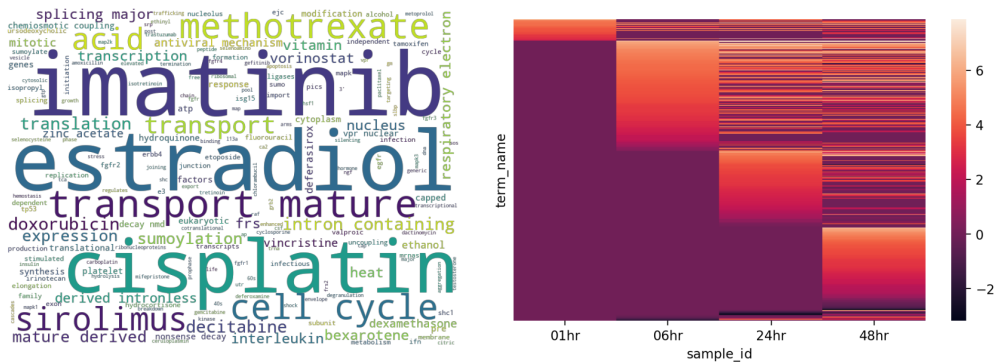

**Supplementary Fig. S3: Time series enrichment analysis pipeline.** Related to Figure 4. Abstract representation of the automation of running enrichment analysis on multiple time points and experimental platforms. We utilize EnrichR to access various databases. We then organize the data. This allows us to explore the output in various ways. We can use word clouds to compress various databases to see common terms across them all. We can also plot enriched terms over times to see trends of biological processes.

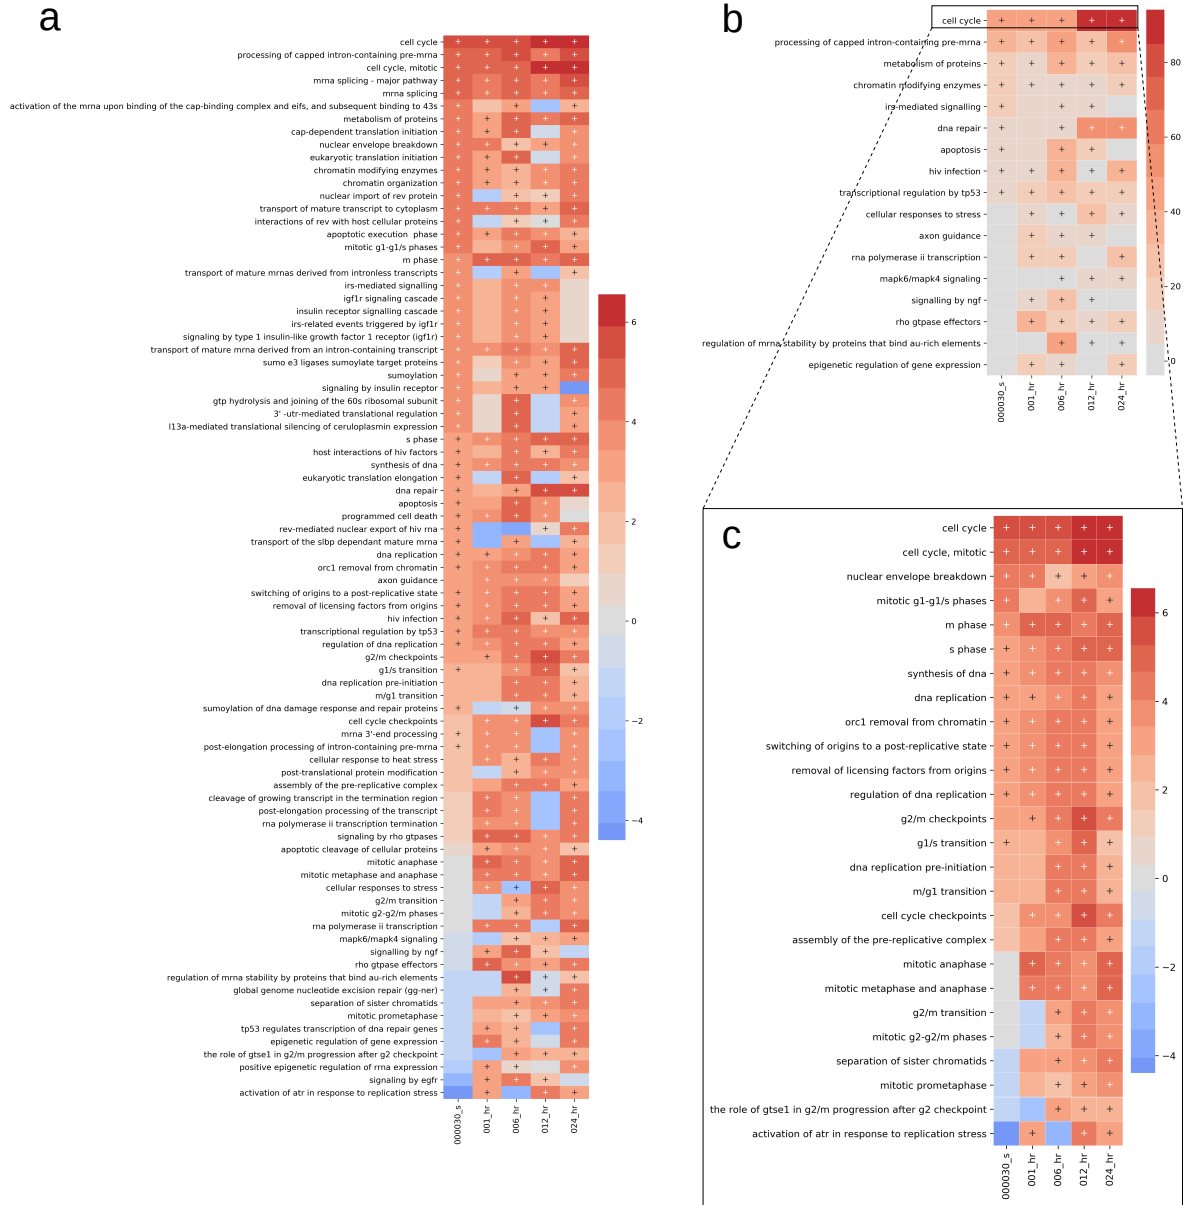

**Supplementary Fig. S4: MAGINE provides enrichment compression** Related to Figure 2. A. Enrichment results for the Reactome gene set. The left figure shows the terms and their enriched values, while the right shows the Jaccard index between all pairs. B. Resulting array after filtering based on Jaccard index similarity. The resulting left figure has 17 terms. C. Terms that have high overlap with *cell cycle*. MAGINE not only provides a method to compress the information of the enrichment array, it also provides methods to extract more detailed, but less enriched terms.

|        | Enrichment Value | Species |
|--------|------------------|---------|
| Term 1 | 15               | A, B, C |
| Term 2 | 10               | C, D, E |

Term 1 to Term 2

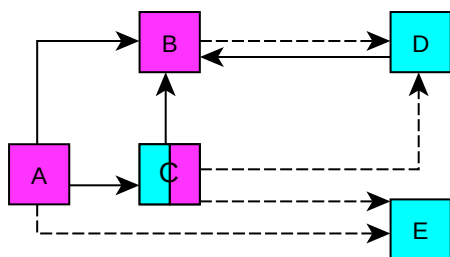

Term 2 to Term 1

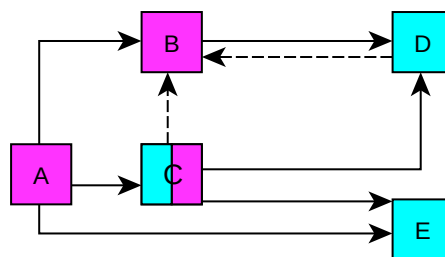

|         |          | Term 1 to Term 2 | Term 2 to Term 1 |
|---------|----------|------------------|------------------|
| # edges | Actual   | 4                | 2                |
|         | Possible | 6                | 6                |

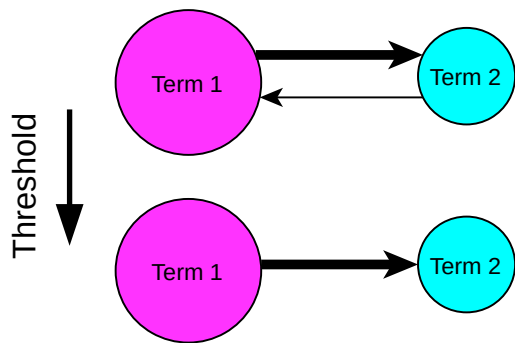

Node size ~ enrichment score  
Edge width ~ edges between terms

**Supplementary Fig. S5: Annotated gene set network construction** Related to Figure 5. Nodes belonging to Term 1 are labeled as pink, Term 2 as blue, and nodes in both are colored both. We calculate the number of edges between nodes in Term 1 to Term 2 and Term 2 and Term 1 (dashed lines), shown in middle table. We then create nodes for each Term, with the size of the node corresponding to the enrichment value. Edges are created between the terms and width set according to the number of edges between the terms. Finally, we applied a minimum of three edges threshold between terms to arrive at our final network.

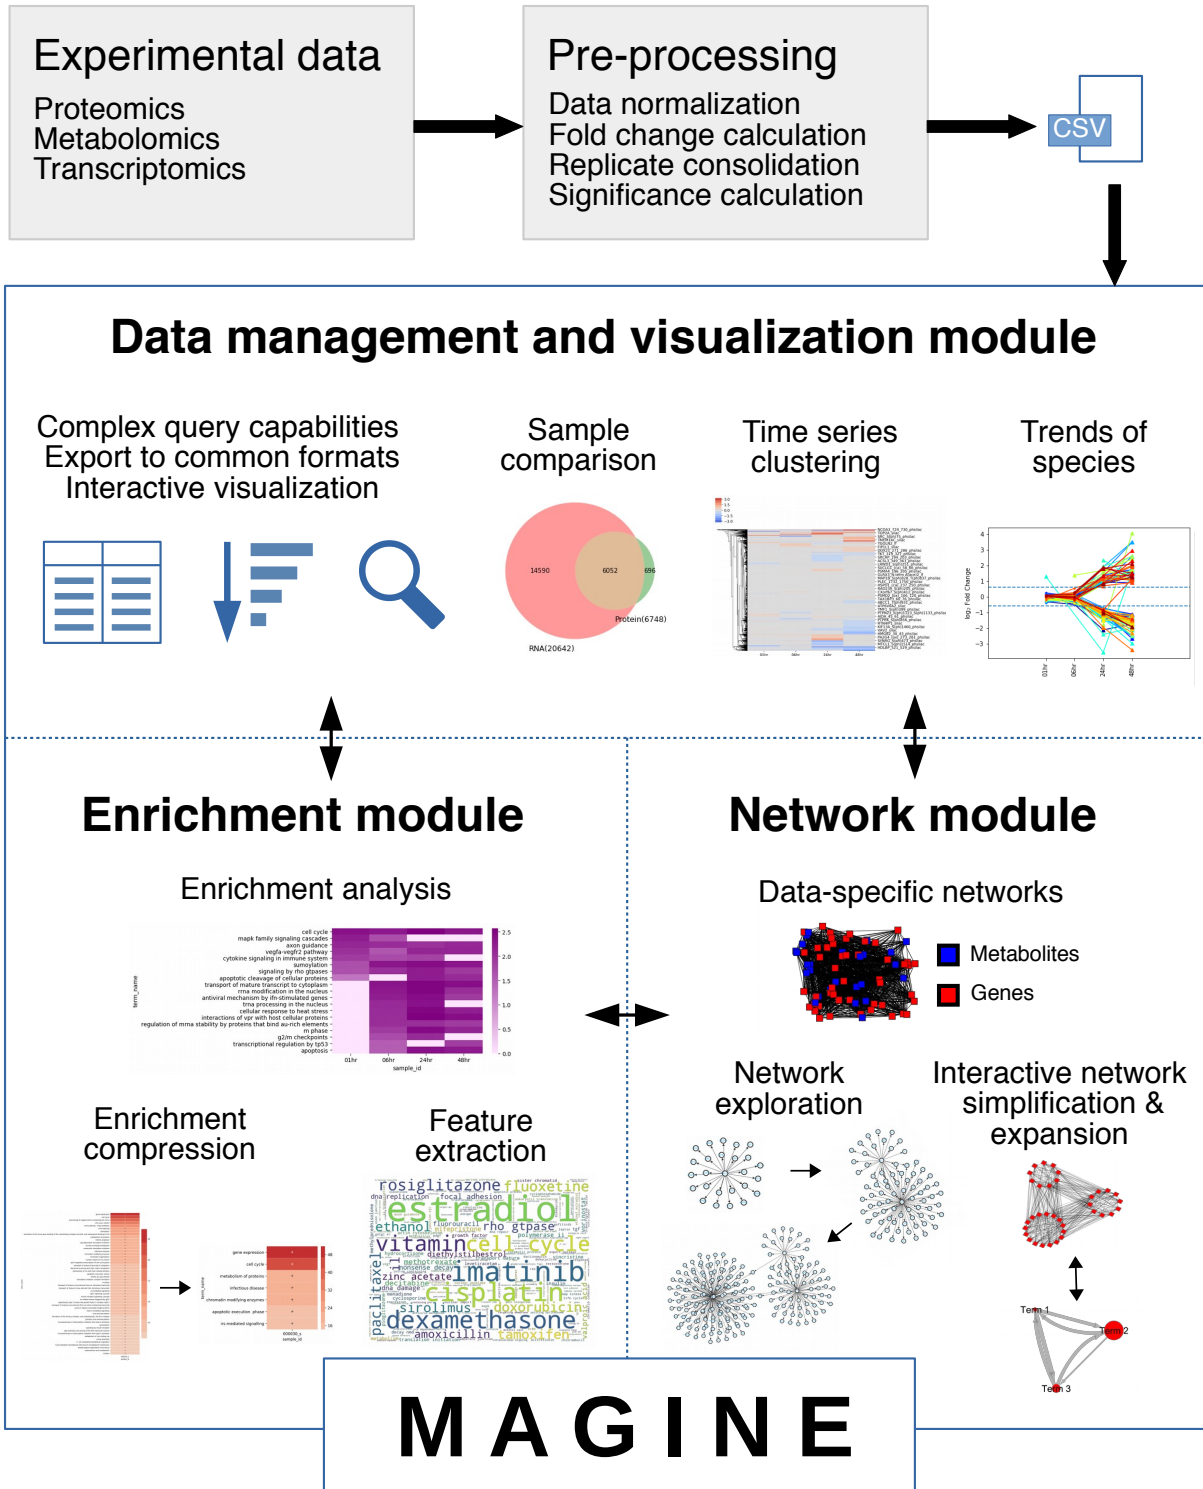

**Supplementary Fig. S6: The MAGINE platform.** Related to Figure 2. MAGINE is designed for quantitative time-series multi-omic data. It is built around three concepts: data management, enrichment analysis, and network exploration. The modular design allows flow of information among the data, enrichment, and network modules, allowing an iterative cycle with varying levels of resolution. Example outputs of each module are provided in each panel.



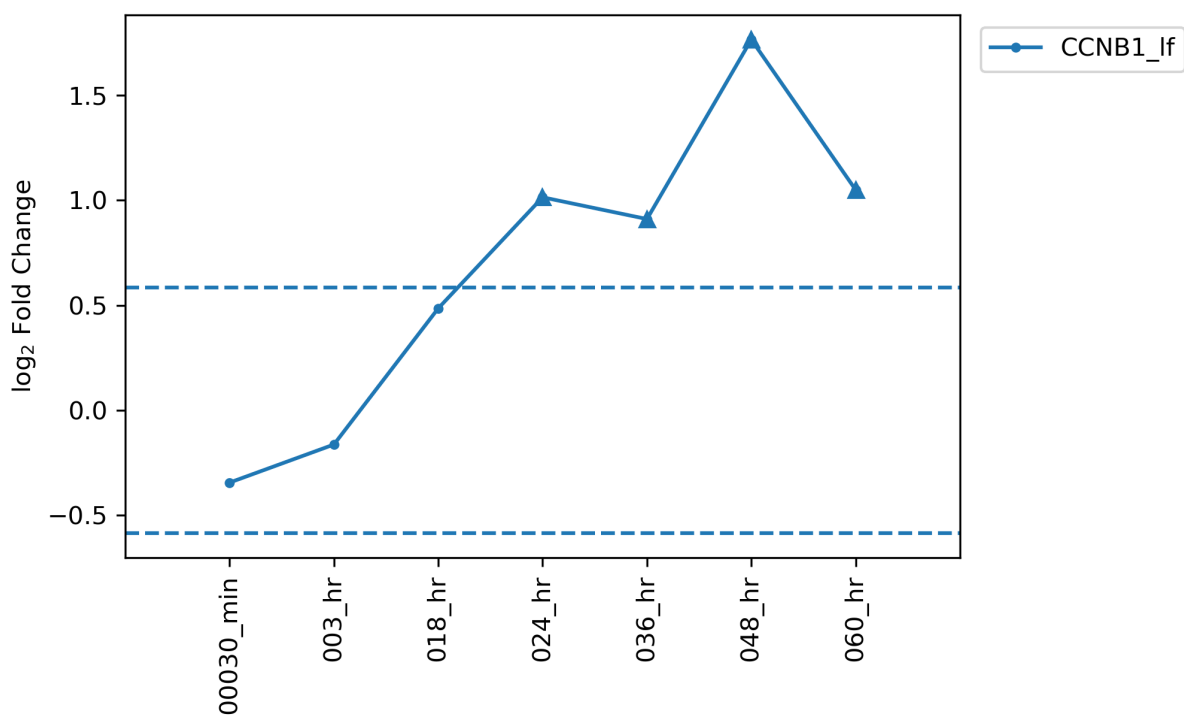

**Supplementary Fig. S7: Label-free CCNB1 expression.** Cyclin b (CCNB1) fold change versus control over time measured by label-free proteomics. Triangle markers depicts significantly changed versus control. Horizontal dashed lines mark +/- 1.5 fold change

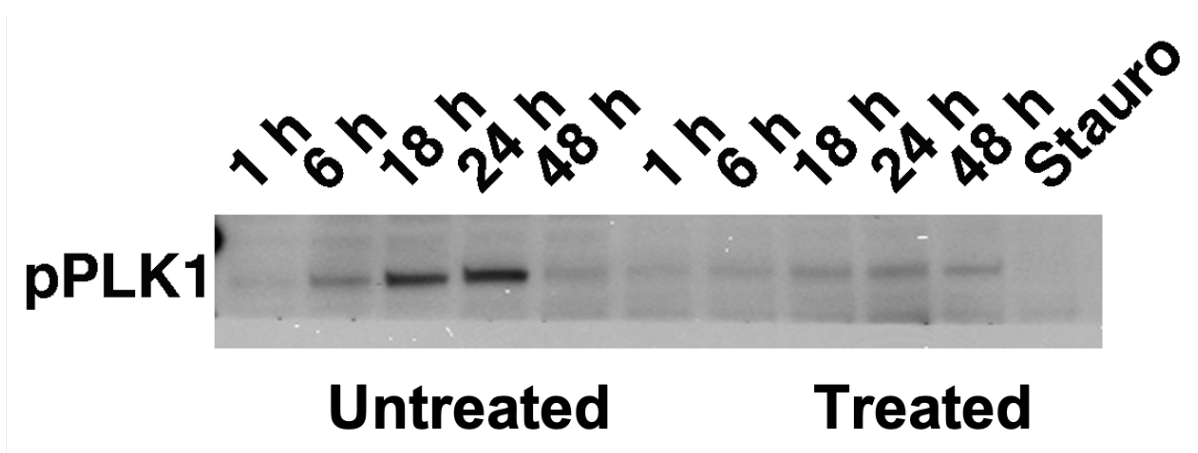

**Supplementary Fig. S8: Western blot of pPLK1.** pPLK1 activity was measured at 1, 6, 18, 24, 48 hour time points in both bendamustine-treated and untreated HL-60 cells.

**A**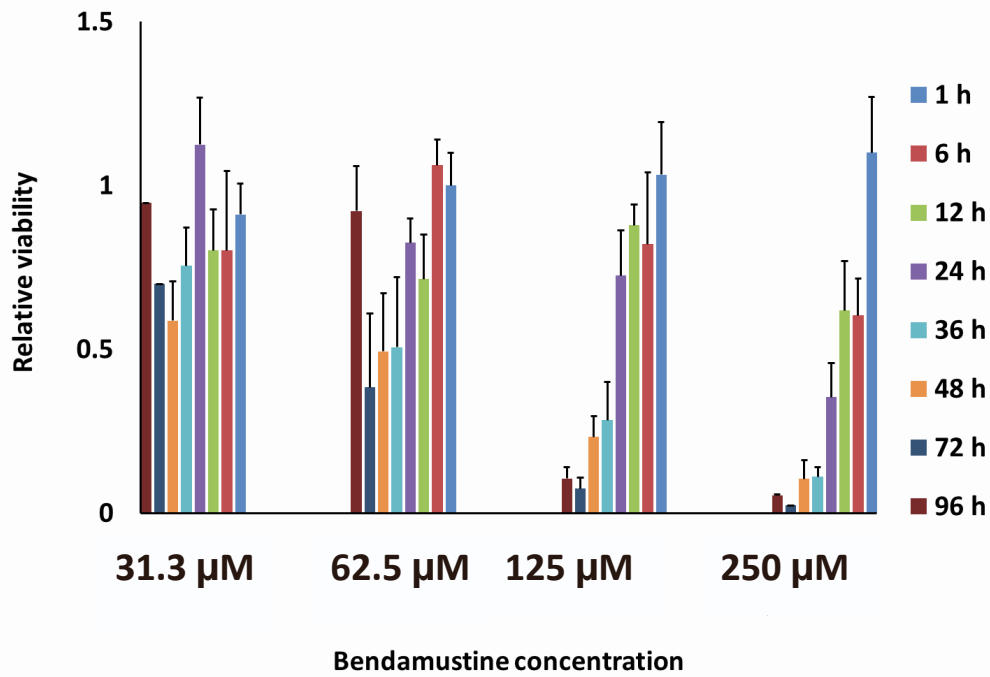**B**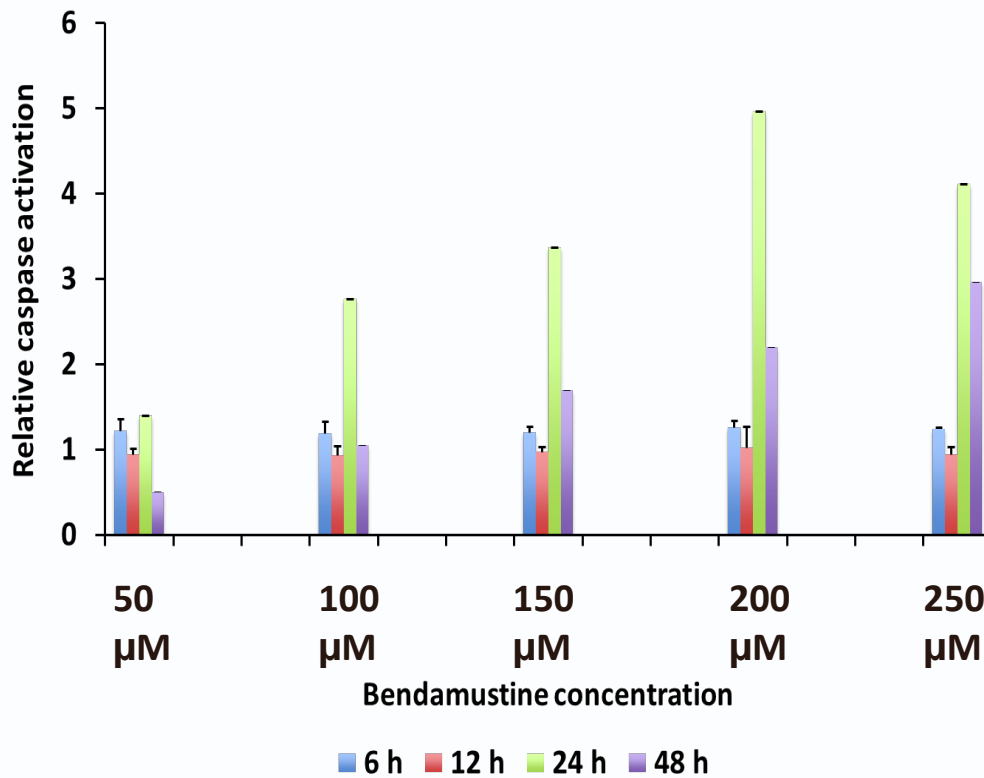

**Supplementary Fig. S9: Viability and caspase activity of bendamustine-treated HL-60 cells.** A. Relative viability of bendamustine-treated HL-60 cells versus untreated cells. B. Relative caspase activation of bendamustine-treated HL-60 cells versus untreated cells.

### 3 Supplementary Tables

| Feature                                        | MAGINE                                                                                                                               | Metascape                                                                                                          | Cytoscape                                                                                                  | Enrichr                                                                                                                         |
|------------------------------------------------|--------------------------------------------------------------------------------------------------------------------------------------|--------------------------------------------------------------------------------------------------------------------|------------------------------------------------------------------------------------------------------------|---------------------------------------------------------------------------------------------------------------------------------|
| Target audience                                | MAGINE serves a broad audience of quantitative biologists - bench and computational.                                                 | Metascape has been designed for experimentalists (bench biologists).                                               | Biologists and bioinformaticians                                                                           | Biologists and bioinformaticians                                                                                                |
| Workflow types                                 | Human-in-the-loop mechanism exploration and optimization, iterative, dynamic, customizable, extendable through Python ecosystem.     | Point-and-click input to output. Lacks ability to customize.                                                       | Point-and-click; extensible through Java plugins                                                           | Web-based, not extensible (not open source).                                                                                    |
| Multi-time point / multi-experiment capability | Native program-based interactivity. Can segment and filter time points and experimental platforms as needed for each analysis.       | Can upload multiple files, but each is analyzed separately. No ability to combine and filter on-the-fly.           | No native support (additional plugins required).                                                           | No native support (must upload separately).                                                                                     |
| Visualization.                                 | Can be included inline within Jupyter Notebooks, as part of the analysis pipeline, or exported to external tools.                    | No connection to expression/experimental data values. Requires external tools.                                     | Point-and-click network analysis (OS native).                                                              | Heat maps of enrichment terms.                                                                                                  |
| Extendable and customizable of tools/workflow  | Python ecosystem allows pre-processing of data, analysis, and further downstream analysis to be handled within a single environment. | Predefined options limited by developers (requires additional steps/tools for pre-processing and further analysis) | Extensible through plugins, but no workflow framework provided.                                            | Web-based interface, could extend through programmatic API, but not alter due to lack of open source code.                      |
| Reproducibility, transferability               | Supports git version control. Jupyter Notebooks and database downloads allow analysis code and inputs to be fixed and reproducible.  | Monthly server updates - not guaranteed to be reproducible if the user reruns the same analysis at a later date.   | Reproducible if never upgraded, otherwise user would have to track Cytoscape and plugin versions manually. | Regular server updates, but database versions can be specified. Access is reliant on web server being maintained in the future. |
| Transparency                                   | Open-source - fully auditable, customizable                                                                                          | No public source code provided. Methods are therefore not fully auditable or customizable.                         | Open-source - fully auditable, customizable                                                                | No public source code provided. Methods are therefore not fully auditable or customizable.                                      |

**Supplementary Table S1:** Comparison of MAGINE’s features and attributes to Metascape[?], Cytoscape[?], and Enrichr[?].

| identifier | label        | type       | significant | fold_change | p_value | source | sample_id |
|------------|--------------|------------|-------------|-------------|---------|--------|-----------|
| BAX        | BAX_S(ph)292 | protein    | True        | 4           | 0.01    | SILAC  | 01hr      |
| HMDB00012  | Deoxyuridine | metabolite | True        | -2          | 0.01    | HILIC  | 02hr      |

**Supplementary Table S2:** Example input data for MAGINE. Data are stored in a comma-separated value (CSV) file.

|            | Name                 | Description                                                        |
|------------|----------------------|--------------------------------------------------------------------|
| Function   | load_data            | Load MAGINE formatted csv                                          |
|            | create_summary_table | Create summary of counts per experimental method and sample_id     |
|            | subset               | Filter data based on list of species                               |
|            | require_n_sig        | Filter data to include species that were measured at least N times |
| Plots      | heatmap              | Create heatmap or clustermap of species                            |
|            | volcano_plot         | Create volcano plot                                                |
|            | volcano_by_sample    | Create a series of volcano plots for each sample                   |
|            | plot_species         | Plot scatter plots of selected species                             |
| Properties | plot_histogram       | Create histogram of fold change values                             |
|            | sig                  | Filter data to include only significant flagged entries            |
|            | up                   | Filter data to include fold change >0                              |
|            | down                 | Filter data to include fold change <0                              |
|            | id_list              | Compile a list of unique species from sample                       |
|            | by_sample            | Generate list of unique species for each sample                    |

**Supplementary Table S3:** Categorized list of key functions in MAGINE's data module.

|           | Name                       | Description                                                                   |
|-----------|----------------------------|-------------------------------------------------------------------------------|
| Functions | load_enrichment            | Load MAGINE created enrichment analysis csv                                   |
|           | run                        | Run enrichment analysis for list of genes across selected gene sets           |
|           | run_samples                | Run enrichment analysis for multiple lists of genes across selected gene sets |
|           | run_enrichment_for_project | Run enrichment for entire ExperimentalData instance                           |
|           | require_n_sig              | Filter data to include species that were measured at least N times            |
|           | filter_multi               | Filter by multiple criteria (p-value, combined_score, database, etc.)         |
|           | find_similar_terms         | Rank order terms by similar gene sets                                         |
|           | filter_based_on_words      | Filter by key words                                                           |
|           | all_genes_from_df          | Generate list of all genes in current EnrichmentResult instance               |
|           | term_to_genes              | Generate list of genes for given term                                         |
| Plots     | remove_redundant           | Remove terms that are less enriched but highly similar                        |
|           | heatmap                    | Find all paths between list                                                   |
|           | dist_matrix                | Plot distance matrix of all terms                                             |

**Supplementary Table S4:** Categorized list of key functions in MAGINE's enrichment module

| Name                    | Description                                                             |
|-------------------------|-------------------------------------------------------------------------|
| build_network           | Generate network centered around provided species                       |
| create_subnetwork       | Create annotated set network from enriched terms and background network |
| paths_between_pair      | Find shortest path(s) between pair                                      |
| paths_between_list      | Find all paths between list                                             |
| paths_between_two_lists | Find paths between two lists                                            |
| neighbors               | Find neighbors (upstream and/or downstream) of node                     |
| expand_neighbors        | Add neighbors of node to network                                        |
| draw                    | Draw using igraph, matplotlib, graphviz, cytoscape.js                   |
| RenderModel             | Create Cytoscape instance of network through py2cytoscape               |

**Supplementary Table S5:** Categorized list of key functions in MAGINE's network module

# Data S1. Experiment data exploration. Related to STAR METHODS.

## 1

### 1.1 ExperimentalData class demonstration

This purpose of this notebook is to introduce and demonstrate the ExperimentalData.

First we import python packages that we need. Please refer to tutorials on Scipy, NumPy, Matplotlib, and Seaborn if unfamiliar with these powerful tools.

```
In [1]: from IPython.display import display
        %matplotlib inline
        import pandas as pd
        import matplotlib.pyplot as plt
        import seaborn as sns
        import numpy as np
        from scipy.stats import pearsonr, spearmanr
```

```
In [2]: import magine.data.tools as dt
        from magine.plotting.wordcloud_tools import create_wordcloud
        from magine.plotting.venn_diagram_maker import create_venn2, create_venn3
```

### 1.2 ExperimentalData class structure

Since MAGINE is built for multi-sample, multi-omics data, it is no surprise that the data is the most important aspect. Here we should how to use the :py:class:ExperimentalData class.

```
In [3]: # load the experimental data
        from magine.data.experimental_data import load_data
```

```
In [4]: help(load_data)
```

Help on function load\_data in module magine.data.experimental\_data:

```
load_data(file_name, **kwargs)
    Load data into EnrichmentResult data class

Parameters
-----
file_name : str
```

```
kwargs :
    Flags to pass to pandas.
```

```
Returns
-----
```

```
df : EnrichmentResult
```

```
In [5]: exp_data = load_data(
        'Data/bendamustine.csv.gz', # filename and location
        # Following args are passed to pandas.read_csv
        low_memory=False,
        index_col=0
    )
```

### 1.2.1 Getting counts from data

First, lets quickly view the stats about the data.

```
In [6]: display(exp_data.create_summary_table())
        display(exp_data.create_summary_table(index='label'))
```

| sample_id  | 000030_s | 00030_min | 001_hr | 003_hr | 006_hr | 012_hr | 018_hr | 024_hr | \ |
|------------|----------|-----------|--------|--------|--------|--------|--------|--------|---|
| source     |          |           |        |        |        |        |        |        |   |
| C18        | 5735     | 5114      | 5721   | 5834   | 6313   | 6574   | 6201   | 4531   |   |
| HILIC      | 11891    | 9412      | 11880  | 7882   | 14215  | 14702  | 12666  | 10451  |   |
| label_free | 3215     | 3451      | 3113   | 4098   | 2907   | 3150   | 4273   | 4374   |   |
| ph_silac   | 3240     | -         | 3495   | -      | 3327   | 3756   | -      | 3212   |   |
| rna_seq    | -        | -         | 16550  | -      | 15887  | 16017  | -      | 16418  |   |
| silac      | 1629     | -         | 1883   | -      | 1761   | 1650   | -      | 1664   |   |

| sample_id  | 036_hr | 048_hr | 060_hr | 072_hr | Total Unique Across |
|------------|--------|--------|--------|--------|---------------------|
| source     |        |        |        |        |                     |
| C18        | 7825   | 6267   | 4751   | 4773   | 19570               |
| HILIC      | 11902  | 13013  | 10804  | 6350   | 27959               |
| label_free | 4100   | 4448   | 4188   | 2628   | 5611                |
| ph_silac   | -      | -      | -      | -      | 4877                |
| rna_seq    | -      | -      | -      | -      | 17679               |
| silac      | -      | -      | -      | -      | 2323                |

| sample_id  | 000030_s | 00030_min | 001_hr | 003_hr | 006_hr | 012_hr | 018_hr | 024_hr | \ |
|------------|----------|-----------|--------|--------|--------|--------|--------|--------|---|
| source     |          |           |        |        |        |        |        |        |   |
| C18        | 5629     | 5014      | 5626   | 5729   | 6188   | 6454   | 6074   | 4458   |   |
| HILIC      | 11754    | 9314      | 11758  | 7781   | 14038  | 14530  | 12493  | 10322  |   |
| label_free | 3730     | 4113      | 3553   | 4717   | 3329   | 3645   | 4953   | 5058   |   |
| ph_silac   | 12224    | -         | 14512  | -      | 12709  | 15472  | -      | 12252  |   |
| rna_seq    | -        | -         | 16550  | -      | 15887  | 16017  | -      | 16418  |   |

```
silac          1629          -    1883          -    1761    1650          -    1664
```

```
sample_id  036_hr 048_hr 060_hr 072_hr  Total Unique Across
source
C18          7707   6155   4670   4687                19212
HILIC        11746  12869  10684  6271                27572
label_free   4651   5263   4767   2911                7428
ph_silac     -        -        -        -                25613
rna_seq      -        -        -        -                17679
silac        -        -        -        -                2323
```

From here, we can see that we have 12 time points and 6 experimental platforms for the data. This is of all the data. We can filter by significantly measured or by looking at label column (default is identifier)

```
In [7]: display(exp_data.create_summary_table(sig=True))
        display(exp_data.create_summary_table(sig=True, index='label'))
```

```
sample_id  000030_s 00030_min  001_hr 003_hr  006_hr 012_hr 018_hr  024_hr \
source
C18          870     121     454   555     444     322     293     341
HILIC        729     452     226   891     354    1053     732     410
label_free   14       18       22     37     113     18       85     161
ph_silac     609     -        883    -       1091    722     -       944
rna_seq      -        -        51     -        51     69     -       611
silac        20       -        30     -        19     20     -       58
```

```
sample_id  036_hr 048_hr 060_hr 072_hr  Total Unique Across
source
C18          1032   684   787   1224                5414
HILIC         83  2118   116   137                6244
label_free    39   162   853   542                1483
ph_silac     -        -        -        -                2437
rna_seq      -        -        -        -                736
silac        -        -        -        -                133
```

```
sample_id  000030_s 00030_min  001_hr 003_hr  006_hr 012_hr 018_hr  024_hr \
source
C18          840     119     443   542     435     314     289     335
HILIC        699     437     215   866     353    1044     713     394
label_free    14       18       22     37     114     18       86     168
ph_silac     755     -       1189    -       1525    975     -       1570
rna_seq      -        -        51     -        51     69     -       611
silac        20       -        30     -        19     20     -       58
```

```
sample_id  036_hr 048_hr 060_hr 072_hr  Total Unique Across
source
```

|            |      |      |     |      |      |
|------------|------|------|-----|------|------|
| C18        | 1014 | 670  | 776 | 1198 | 5296 |
| HILIC      | 83   | 2094 | 115 | 134  | 6138 |
| label_free | 39   | 170  | 925 | 591  | 1653 |
| ph_silac   | -    | -    | -   | -    | 5115 |
| rna_seq    | -    | -    | -   | -    | 736  |
| silac      | -    | -    | -   | -    | 133  |

The `.species` index aggregates all data. Since we utilize a `pandas.DataFrame`, we can use the `.head` method to glance at the data.

```
In [8]: exp_data.species.head(5)
```

```
Out[8]:
```

|   | identifier | label          | fold_change | significant | p_value | species_type |
|---|------------|----------------|-------------|-------------|---------|--------------|
| 0 | UBA6       | UBA6_silac     | -1.049913   | False       | 1.0     | protein      |
| 1 | MTDH       | MTDH_silac     | -1.038867   | False       | 1.0     | protein      |
| 2 | SLC25A24   | SLC25A24_silac | 1.014615    | False       | 1.0     | protein      |
| 3 | ANKRD22    | ANKRD22_silac  | -1.058937   | False       | 1.0     | protein      |
| 4 | AGK        | AGK_silac      | 1.001600    | False       | 1.0     | protein      |

  

```

sample_id source
0 001_hr silac
1 001_hr silac
2 001_hr silac
3 001_hr silac
4 001_hr silac

```

We can filter the data by source using the `.name`, where name is anything in the source column. We can get a list of these by printing `exp_data.exp_methods`

```
In [9]: exp_data.exp_methods
```

```
Out[9]: ['silac', 'ph_silac', 'HILIC', 'C18', 'label_free', 'rna_seq']
```

```
In [10]: # filters to only the 'label_free'
exp_data.label_free.shape
```

```
Out[10]: (50736, 8)
```

```
In [11]: exp_data.label_free.head(5)
```

```
Out[11]:
```

|        | identifier | label                | fold_change | significant | p_value |
|--------|------------|----------------------|-------------|-------------|---------|
| 515804 | RHOXF2B    | RHOXF2B_lf           | 1.51        | True        | 0.0003  |
| 515805 | KIF11      | KIF11_lf             | 1.70        | True        | 0.0008  |
| 515806 | MYBBP1A    | MYBBP1A_S(ph)1163_lf | 1.40        | False       | 0.0009  |
| 515807 | CDC20      | CDC20_lf             | 2.78        | True        | 0.0012  |
| 515808 | TMPO       | TMPO_T(ph)160_lf     | -1.47       | False       | 0.0016  |

  

```

species_type sample_id source

```



```

515804    protein    036_hr  label_free
515805    protein    036_hr  label_free
515806    protein    036_hr  label_free
515807    protein    036_hr  label_free
515808    protein    036_hr  label_free

```

```
In [12]: exp_data.rna_seq.head(5)
```

```

Out[12]:
   identifier      label  fold_change  significant  p_value \
566540    CDC20    CDC20_rnaseq   -1.528232         True  0.016321
566541    ASPM    ASPM_rnaseq   -1.346689        False  0.038802
566542  F0538757.2  F0538757.2_rnaseq    2.133888         True  0.038802
566543    GNL3    GNL3_rnaseq   -2.313025         True  0.016321
566544   SNORD19   SNORD19_rnaseq   -2.313025         True  0.016321

   species_type  sample_id  source
566540    rna_seq    012_hr  rna_seq
566541    rna_seq    012_hr  rna_seq
566542    rna_seq    012_hr  rna_seq
566543    rna_seq    012_hr  rna_seq
566544    rna_seq    012_hr  rna_seq

```

### 1.2.2 Significant filter

We can use the significant column to filter that data to only contain those species.

```
In [13]: exp_data.species.shape
```

```
Out[13]: (558025, 8)
```

```
In [14]: exp_data.species.sig.shape
```

```
Out[14]: (24620, 8)
```

### 1.2.3 Filter data to up or down regulated species.

For enrichment analysis, we will want to access up-regulated and down-regulated species using `.up` and `.down`.

```
In [15]: exp_data.rna_seq.up.head(5)
```

```

Out[15]:
   identifier      label  fold_change  significant \
566542  F0538757.2  F0538757.2_rnaseq    2.133888         True
566546  RP4-669L17.10  RP4-669L17.10_rnaseq    3.788399         True
566547  RP4-669L17.4  RP4-669L17.4_rnaseq    3.788399         True
566548    RNU6-513P    RNU6-513P_rnaseq    2.462533         True
566549    RRP7B    RRP7B_rnaseq    2.462533         True

   p_value  species_type  sample_id  source
566542  0.038802    rna_seq    012_hr  rna_seq

```

```

566546  0.029804      rna_seq    012_hr  rna_seq
566547  0.029804      rna_seq    012_hr  rna_seq
566548  0.016321      rna_seq    012_hr  rna_seq
566549  0.016321      rna_seq    012_hr  rna_seq

```

```
In [16]: exp_data.rna_seq.down.head(5)
```

```

Out[16]:
   identifier      label  fold_change  significant  p_value \
566540    CDC20    CDC20_rnaseq   -1.528232         True  0.016321
566543     GNL3    GNL3_rnaseq   -2.313025         True  0.016321
566544  SNORD19  SNORD19_rnaseq   -2.313025         True  0.016321
566545  SNORD19B  SNORD19B_rnaseq   -2.313025         True  0.016321
566550   FAM73A   FAM73A_rnaseq   -9.644115         True  0.016321

   species_type  sample_id  source
566540    rna_seq    012_hr  rna_seq
566543    rna_seq    012_hr  rna_seq
566544    rna_seq    012_hr  rna_seq
566545    rna_seq    012_hr  rna_seq
566550    rna_seq    012_hr  rna_seq

```

### 1.2.4 Extracting by sample (time point)

We can filter by `sample_id`.

```
In [17]: exp_data.sample_ids
```

```

Out[17]: ['000030_s',
          '00030_min',
          '001_hr',
          '003_hr',
          '006_hr',
          '012_hr',
          '018_hr',
          '024_hr',
          '036_hr',
          '048_hr',
          '060_hr',
          '072_hr']

```

```
In [18]: exp_data['000030_s'].head(5)
```

```

Out[18]:
   identifier      label  fold_change  significant  p_value  species_type \
5200     UBA6    UBA6_silac   -1.088427         False     1.0     protein
5201    AKR1A1  AKR1A1_silac    1.065195         False     1.0     protein
5202    MTHFD2  MTHFD2_silac   -1.308449         False     1.0     protein
5203     DLAT    DLAT_silac    1.029963         False     1.0     protein
5204     CNP    CNP_silac   -1.244300         False     1.0     protein

```

```

    sample_id source
5200  000030_s  silac
5201  000030_s  silac
5202  000030_s  silac
5203  000030_s  silac
5204  000030_s  silac

```

## 1.2.5 Calculating overlaps between time points

In [19]: `from itertools import combinations`

```

def overlap(vals):
    return len(vals[0].intersection(vals[1]))

def calc_dist(names, gene_sets, figsize=(12, 12)):

    n_dim = len(names)
    scores = list(map(overlap, combinations(gene_sets, 2)))

    dist_mat = np.zeros((n_dim, n_dim), dtype=float)
    ind = 0
    for i in range(n_dim):
        for j in range(i, n_dim):
            if i == j:
                dist_mat[i, i] = np.nan
                continue
            elif i >= j:
                continue
            dist_mat[i, j] = scores[ind]
            dist_mat[j, i] = scores[ind]
            ind += 1

    fig = plt.figure(figsize=figsize)
    ax = fig.add_subplot(111)
    cmap=plt.cm.Reds
    cmap.set_under(".5")
    fig = sns.heatmap(dist_mat, cmap=cmap, fmt='3g', annot=True, linewidths=0.1,
                      xticklabels=names, yticklabels=names, ax=ax, square=False)
    ax.xaxis.tick_top()
    ax.set_xticklabels(names, minor=False, rotation=90, fontsize=12)
    ax.set_yticklabels(names, minor=False, rotation=0, fontsize=12)

def overlap_by_source(source_name, figsize=(10, 10)):
    sample_ids = np.array(exp_data[source_name].sample_ids)
    sample_sets = exp_data[source_name].sig.by_sample
    calc_dist(sample_ids, sample_sets, figsize)

```

```

overlap_by_source('label_free')
overlap_by_source('rna_seq', figsize=(6, 6))
overlap_by_source('silac', figsize=(6, 6))
overlap_by_source('ph_silac', figsize=(4, 4))
plt.savefig("ph_silac_overlap_by_time.png", dpi=300, bbox_inches='tight')

```

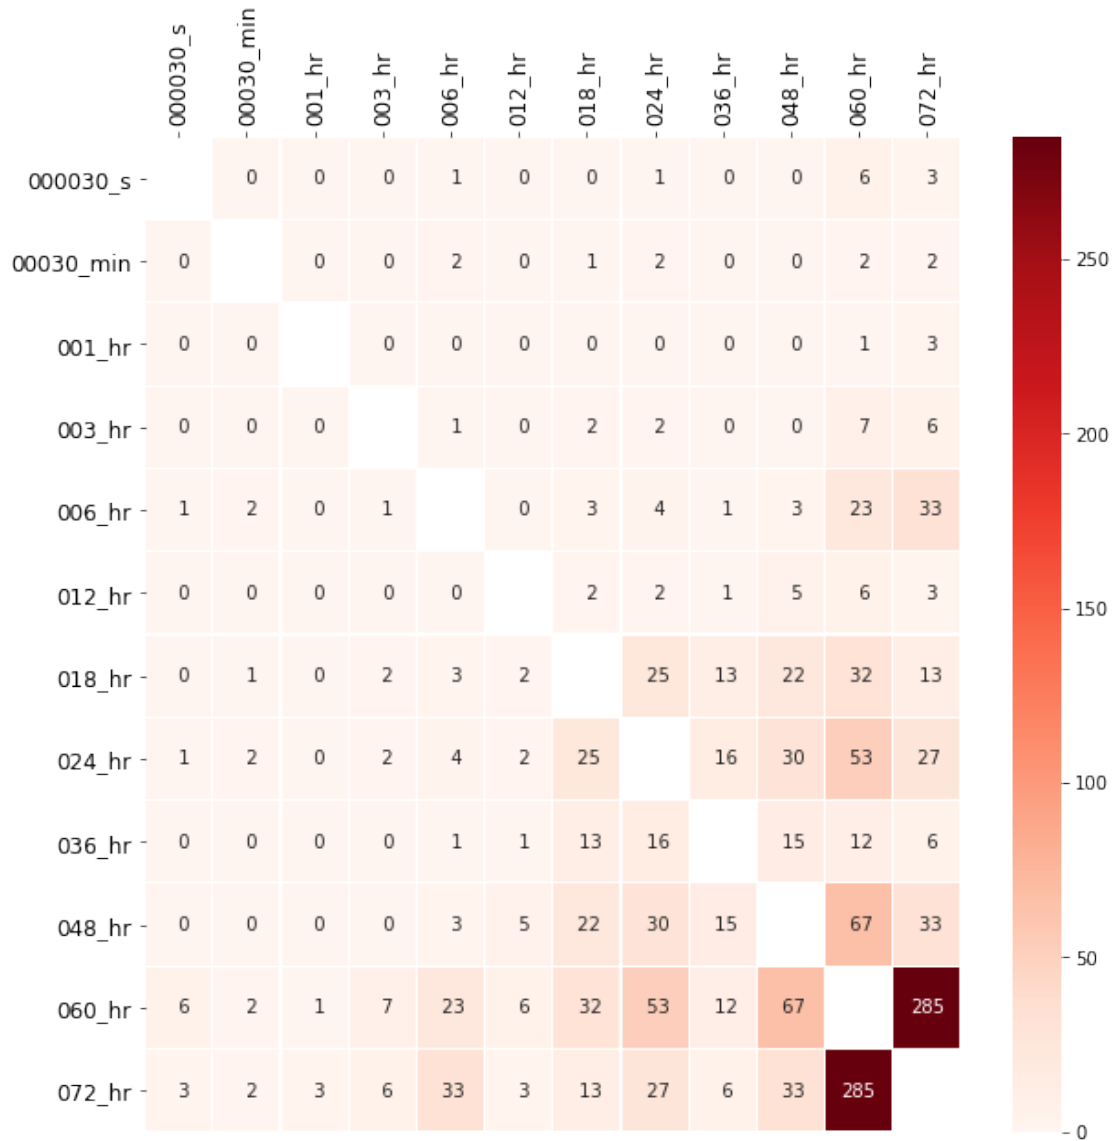

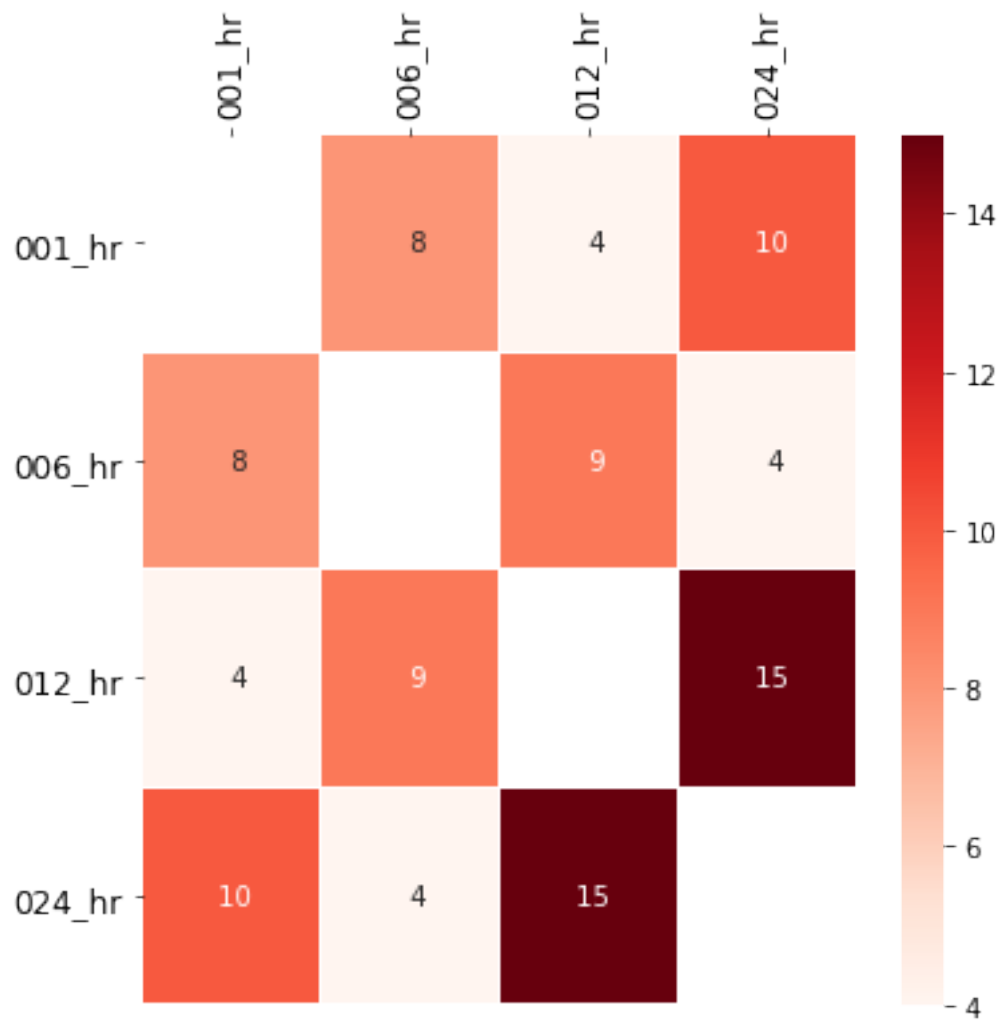

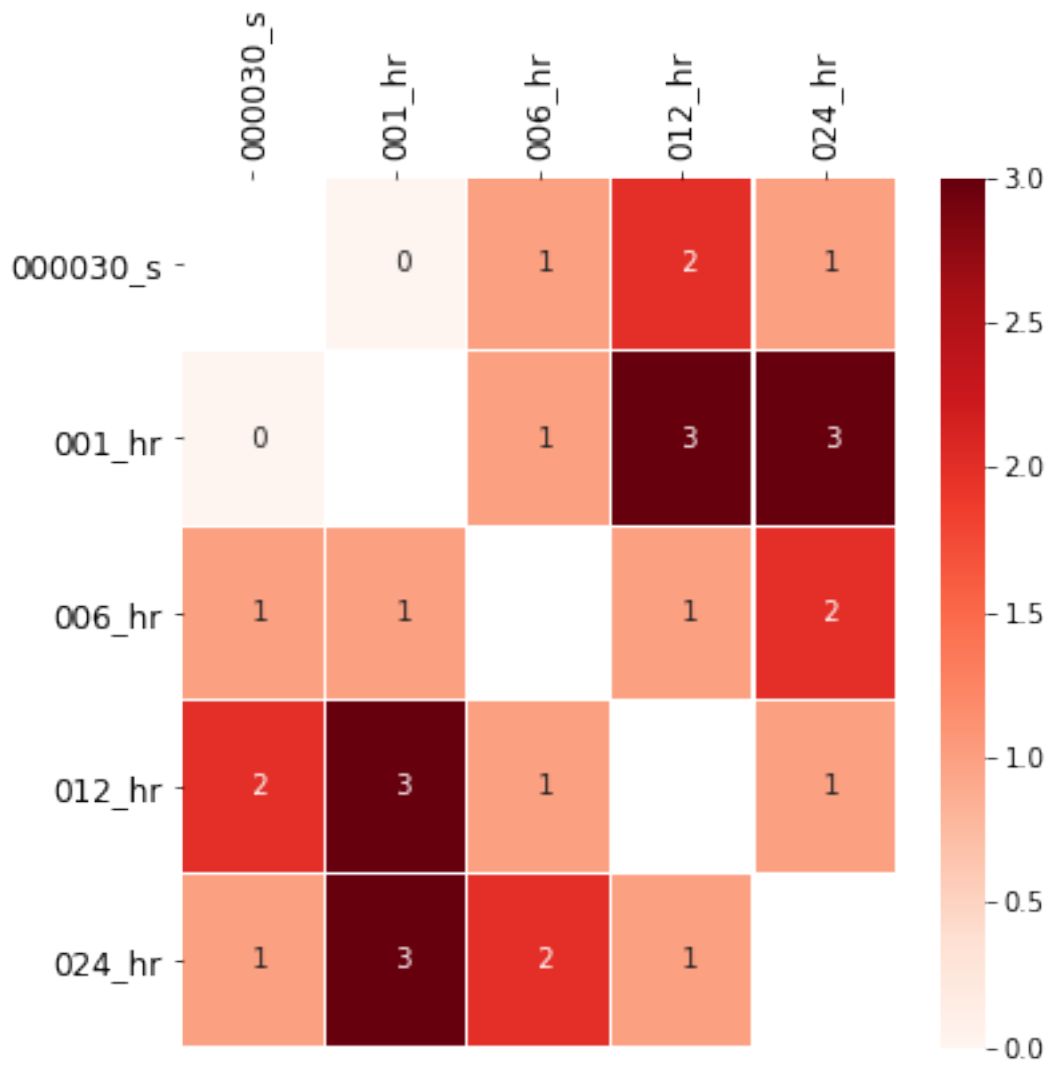

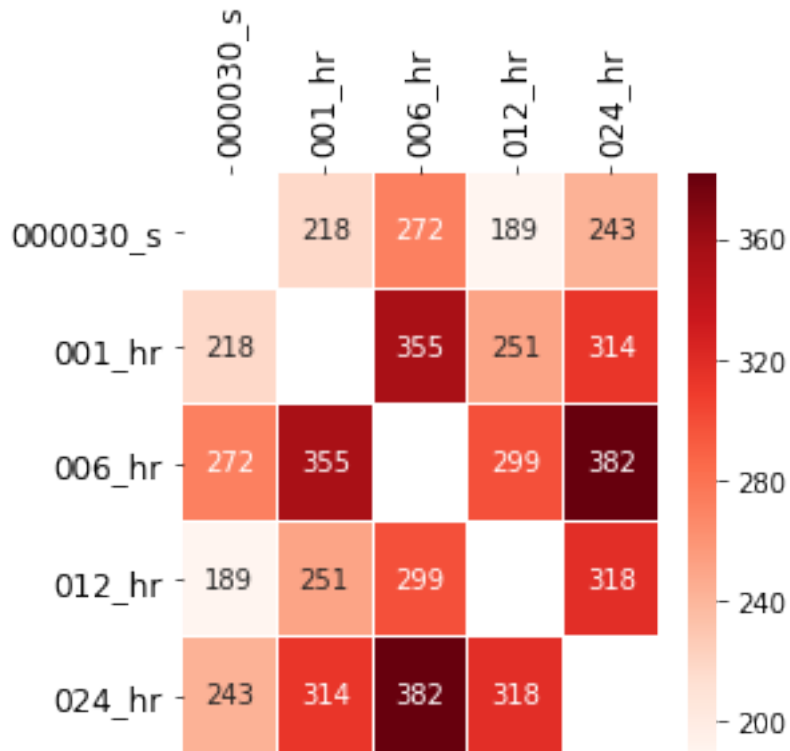

We can apply the same function to compare across experimental platforms.

```
In [20]: names, sets = [], []
         for i in exp_data.exp_methods:
             sets.append(exp_data[i].sig.id_list)
             names.append(i)
         calc_dist(names, sets, figsize=(4, 4))
         plt.savefig("overlap_experiments.png", dpi=300, bbox_inches='tight')
```

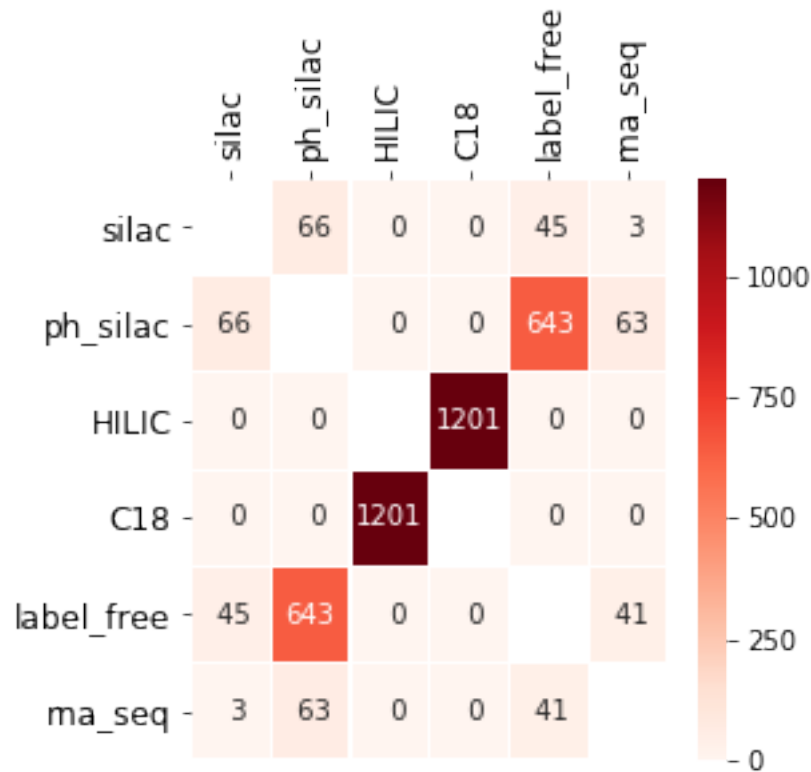

### 1.2.6 Pivot table to get table across time

```
In [21]: exp_data.rna_seq.pivoter(
        convert_to_log=False,
        index='identifier',
        columns='sample_id',
        values=['fold_change', 'p_value']
    ).head(5)
```

```
Out[21]:
```

| sample_id | fold_change |           |           |           | p_value  |         |
|-----------|-------------|-----------|-----------|-----------|----------|---------|
|           | 001_hr      | 006_hr    | 012_hr    | 024_hr    | 001_hr   | 006_hr  |
| 7SK       | 1.139800    | -1.148785 | -1.014452 | 1.037751  | 0.999631 | 0.99995 |
| A1BG      | -2.402129   | 1.288824  | 1.610149  | 1.168061  | 0.999631 | 0.99995 |
| A1BG-AS1  | -1.081850   | 1.257409  | 1.056497  | -1.099355 | 0.999631 | 0.99995 |
| A2ML1     | -1.372659   | 1.307877  | -1.343714 | 1.793100  | 0.999631 | 0.99995 |
| AAAS      | 1.203116    | -1.058658 | -1.012985 | 1.007011  | 0.999631 | 0.99995 |

```
sample_id    012_hr    024_hr
identifier
7SK          0.999660  0.864095
```



```

A1BG          0.803284  0.673174
A1BG-AS1      0.999660  0.752914
A2ML1         0.999660  0.274612
AAAS          0.999660  0.970896

```

```

In [22]: exp_data.ph_silac.pivoter(
        convert_to_log=False,
        index='label',
        columns='sample_id',
        values=['fold_change', 'p_value']
    ).head(5)

```

```

Out[22]:

```

|                       | fold_change |           |           |           |           |  |
|-----------------------|-------------|-----------|-----------|-----------|-----------|--|
| sample_id             | 000030_s    | 001_hr    | 006_hr    | 012_hr    | 024_hr    |  |
| label                 |             |           |           |           |           |  |
| A2M_1004_1014_phsilac | NaN         | -1.060800 | NaN       | 43.747479 | NaN       |  |
| A2M_339_345_phsilac   | NaN         | NaN       | NaN       | -1.157100 | NaN       |  |
| AAAS_S(ph)495_phsilac | 1.121971    | -1.230439 | -1.159737 | -1.288961 | -1.486965 |  |
| AAGAB_134_161_phsilac | 1.134301    | NaN       | NaN       | NaN       | NaN       |  |
| AAGAB_274_284_phsilac | NaN         | NaN       | NaN       | -1.123760 | NaN       |  |

  

|                       | p_value  |        |        |        |        |  |
|-----------------------|----------|--------|--------|--------|--------|--|
| sample_id             | 000030_s | 001_hr | 006_hr | 012_hr | 024_hr |  |
| label                 |          |        |        |        |        |  |
| A2M_1004_1014_phsilac | NaN      | 1.0    | NaN    | 0.049  | NaN    |  |
| A2M_339_345_phsilac   | NaN      | NaN    | NaN    | 1.000  | NaN    |  |
| AAAS_S(ph)495_phsilac | 1.0      | 1.0    | 1.0    | 1.000  | 1.0    |  |
| AAGAB_134_161_phsilac | 1.0      | NaN    | NaN    | NaN    | NaN    |  |
| AAGAB_274_284_phsilac | NaN      | NaN    | NaN    | 1.000  | NaN    |  |

Note that in the previous example, we find that there are NaN values. This is because there might be measurements missing in our experimental data. We can easily check what species are not found in all samples.

```

In [23]: measured_in_all = exp_data.ph_silac.present_in_all_columns(
        index='label',
        columns='sample_id',
    )

```

Number in index went from 25613 to 5595

```

In [24]: measured_in_all.pivoter(
        convert_to_log=False,
        index='label',
        columns='sample_id',
        values=['fold_change', 'p_value']
    ).head(10)

```

Out [24]:

| sample_id<br>label                      | fold_change |           |           |
|-----------------------------------------|-------------|-----------|-----------|
|                                         | 000030_s    | 001_hr    | 006_hr    |
| AAAS_S(ph)495_phsilac                   | 1.121971    | -1.230439 | -1.159737 |
| AAGAB_S(ph)310_S(ph)311_phsilac         | -0.031090   | 1.711100  | -1.557812 |
| AAK1_T(ph)606_phsilac                   | -1.105709   | -1.013440 | 1.033784  |
| AAK1_T(ph)620_S(ph)623_phsilac          | 1.003735    | -1.002832 | -0.015575 |
| AARS_(ca)_173_194_phsilac               | 1.039944    | 1.243000  | 1.254237  |
| AARS_225_235_phsilac                    | 1.094279    | 1.107042  | 1.051156  |
| AASDHPPT_253_267_phsilac                | 1.007512    | 1.013656  | 1.002298  |
| AATF_S(ph)316_S(ph)320_S(ph)321_phsilac | -0.020251   | -1.538099 | 1.119900  |
| ABCE1_(ox)_542_557_phsilac              | -1.254600   | -1.226600 | 1.005787  |
| ABCE1_213_224_phsilac                   | 1.072050    | -1.006802 | 1.097534  |

| sample_id<br>label                      | p_value   |           |          |        |
|-----------------------------------------|-----------|-----------|----------|--------|
|                                         | 012_hr    | 024_hr    | 000030_s | 001_hr |
| AAAS_S(ph)495_phsilac                   | -1.288961 | -1.486965 | 1.0      | 1.000  |
| AAGAB_S(ph)310_S(ph)311_phsilac         | -0.000927 | -1.657294 | 1.0      | 0.049  |
| AAK1_T(ph)606_phsilac                   | -2.708685 | -2.866159 | 1.0      | 1.000  |
| AAK1_T(ph)620_S(ph)623_phsilac          | -1.082963 | -1.051561 | 1.0      | 1.000  |
| AARS_(ca)_173_194_phsilac               | -1.347523 | -1.034186 | 1.0      | 1.000  |
| AARS_225_235_phsilac                    | -1.199240 | 1.101794  | 1.0      | 1.000  |
| AASDHPPT_253_267_phsilac                | -1.222638 | 1.148329  | 1.0      | 1.000  |
| AATF_S(ph)316_S(ph)320_S(ph)321_phsilac | -1.107462 | -1.393000 | 1.0      | 0.049  |
| ABCE1_(ox)_542_557_phsilac              | -1.732200 | 1.001636  | 1.0      | 1.000  |
| ABCE1_213_224_phsilac                   | -1.155031 | -1.085661 | 1.0      | 1.000  |

| sample_id<br>label                      | 006_hr                | 012_hr | 024_hr |
|-----------------------------------------|-----------------------|--------|--------|
|                                         | AAAS_S(ph)495_phsilac | 1.000  | 1.000  |
| AAGAB_S(ph)310_S(ph)311_phsilac         | 0.049                 | 1.000  | 1.000  |
| AAK1_T(ph)606_phsilac                   | 1.000                 | 0.049  | 0.049  |
| AAK1_T(ph)620_S(ph)623_phsilac          | 1.000                 | 1.000  | 1.000  |
| AARS_(ca)_173_194_phsilac               | 1.000                 | 1.000  | 1.000  |
| AARS_225_235_phsilac                    | 1.000                 | 1.000  | 1.000  |
| AASDHPPT_253_267_phsilac                | 1.000                 | 1.000  | 1.000  |
| AATF_S(ph)316_S(ph)320_S(ph)321_phsilac | 1.000                 | 1.000  | 1.000  |
| ABCE1_(ox)_542_557_phsilac              | 1.000                 | 0.049  | 1.000  |
| ABCE1_213_224_phsilac                   | 1.000                 | 1.000  | 1.000  |

This shows that out of the 25613 unique species measured in ph\_silac proteomics, only 5595 were measured in all time points. What one can do with this information is dependent on the analysis. For now, we will keep using the full dataset.

We can use this same principle and filter that data by requiring a species to be significant in n sample\_id.

In [25]: lf\_4\_tp = exp\_data.label\_free.require\_n\_sig(

```

        index='label',
        columns='sample_id',
        n_sig=4
    )
    display(lf_4_tp.head(10))

```

|        | identifier | label                      | fold_change | significant | \ |
|--------|------------|----------------------------|-------------|-------------|---|
| 515805 | KIF11      | KIF11_lf                   | 1.70        | True        |   |
| 515807 | CDC20      | CDC20_lf                   | 2.78        | True        |   |
| 515810 | CKAP2      | CKAP2_lf                   | 1.63        | True        |   |
| 515813 | TPX2       | TPX2_lf                    | 1.93        | True        |   |
| 515814 | KIFC1      | KIFC1_lf                   | 1.73        | True        |   |
| 515822 | RRM2       | RRM2_lf                    | 1.92        | True        |   |
| 515825 | NUSAP1     | NUSAP1_lf                  | 1.92        | True        |   |
| 515827 | CDCA5      | CDCA5_lf                   | 1.76        | True        |   |
| 515831 | UBE2S      | UBE2S_lf                   | 1.52        | True        |   |
| 515835 | HIST1H1B   | HIST1H1B_N-term S(ace)2_lf | -1.51       | True        |   |

|        | p_value | species_type | sample_id | source     |
|--------|---------|--------------|-----------|------------|
| 515805 | 0.0008  | protein      | 036_hr    | label_free |
| 515807 | 0.0012  | protein      | 036_hr    | label_free |
| 515810 | 0.0024  | protein      | 036_hr    | label_free |
| 515813 | 0.0038  | protein      | 036_hr    | label_free |
| 515814 | 0.0040  | protein      | 036_hr    | label_free |
| 515822 | 0.0075  | protein      | 036_hr    | label_free |
| 515825 | 0.0087  | protein      | 036_hr    | label_free |
| 515827 | 0.0108  | protein      | 036_hr    | label_free |
| 515831 | 0.0120  | protein      | 036_hr    | label_free |
| 515835 | 0.0131  | protein      | 036_hr    | label_free |

## 1.2.7 Visualization

### Volcano plots

```
In [26]: exp_data.label_free.volcano_plot();
```

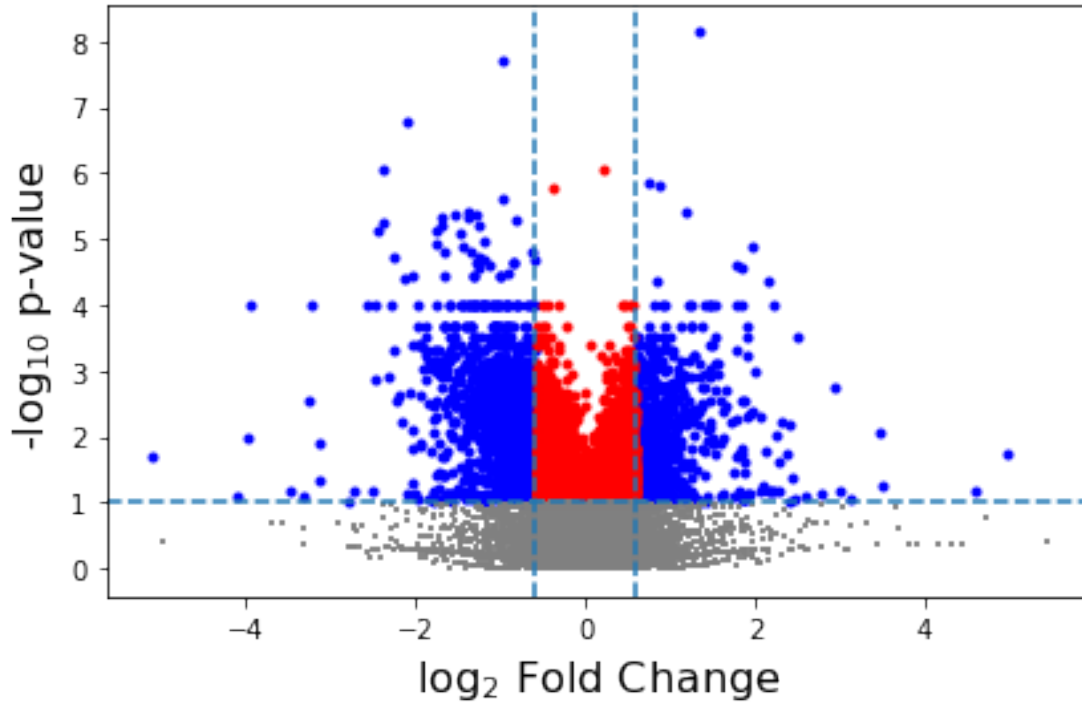

In [27]: `exp_data.label_free.volcano_by_sample(sig_column=True);`

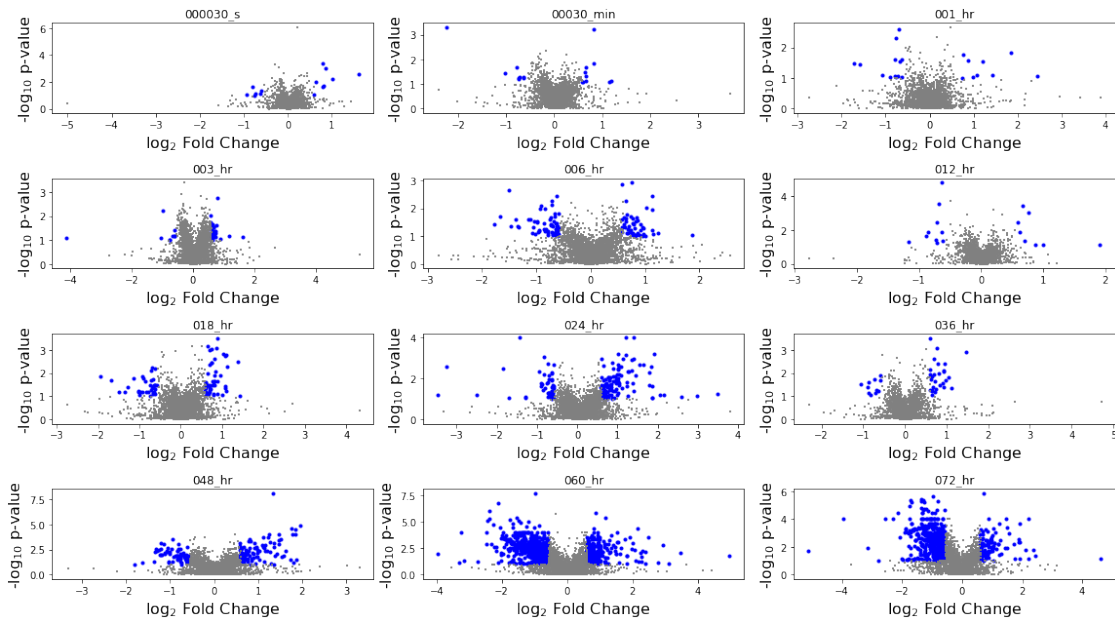

## Histogram

```
In [28]: exp_data.label_free.plot_histogram();
```

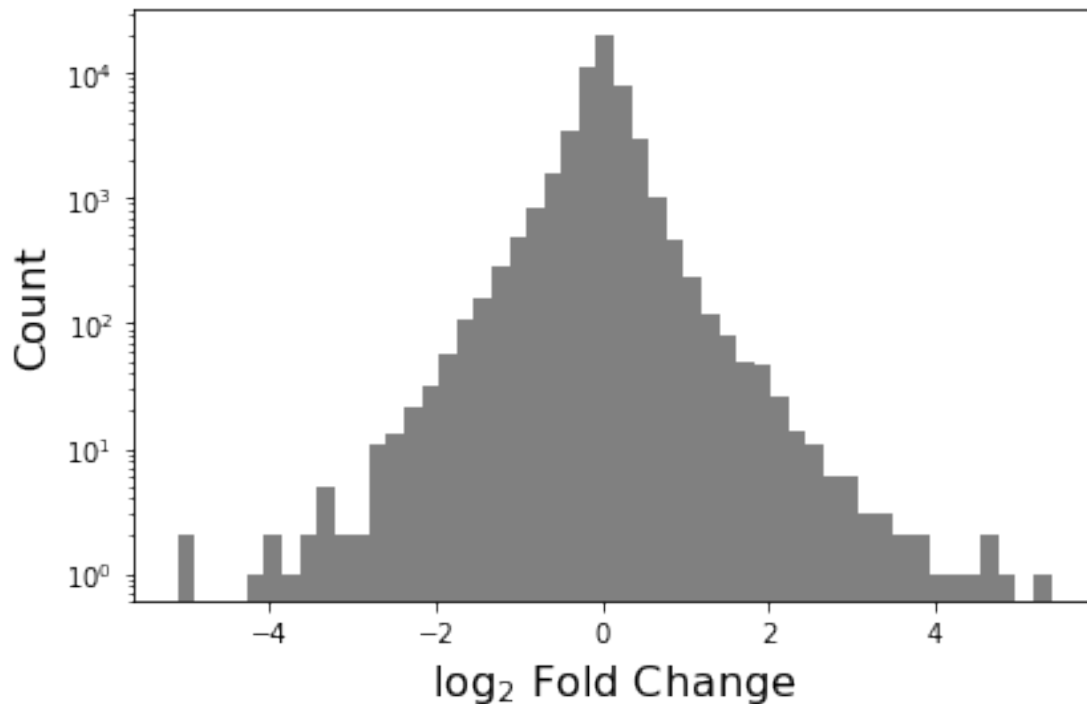

**Plotting subset of species** We provide the a few plotting interfaces to explore that subsets of the data. Basically, you create a list of species and provide it to the function. It filters based on these and then returns the results.

### Time series using ploty and matplotlib

```
In [29]: # sample list for demo purposes
interesting_list = ['CCNA2', 'CDCA5', 'CDC20', 'AURKA', 'AURKB']

exp_data.label_free.plot_species(interesting_list, plot_type='matplotlib');
```

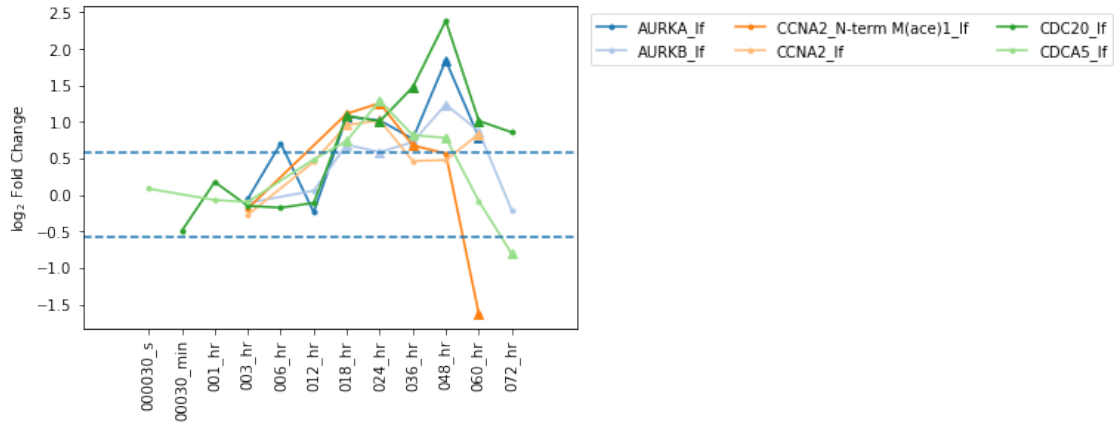

In [30]: `exp_data.label_free.plot_species(interesting_list, plot_type='plotly')`

### Heatplots

In [31]: `exp_data.label_free.heatmap(interesting_list, linewidths=0.01, figsize=(4,3));`

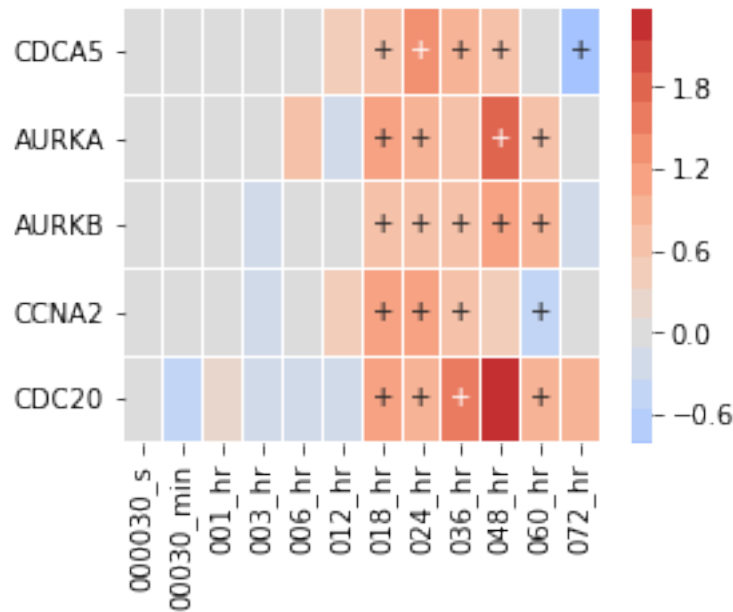

Notice that the above plot doesn't show any of the modifiers of `CCNA2_N-term M(ace)1_if`. This is because the default index to pivot plots is the identifier column. You can set the label column for plotting by passing `index=label` to the function. Note, if you want to filter the data using the more generic identifier column, you just specify that with `subset_index=identifier`

```
In [32]: exp_data.label_free.heatmap(
    interesting_list,
    index='label',
    subset_index='identifier',
    linewidths=0.01,
    figsize=(4,3)
);
```

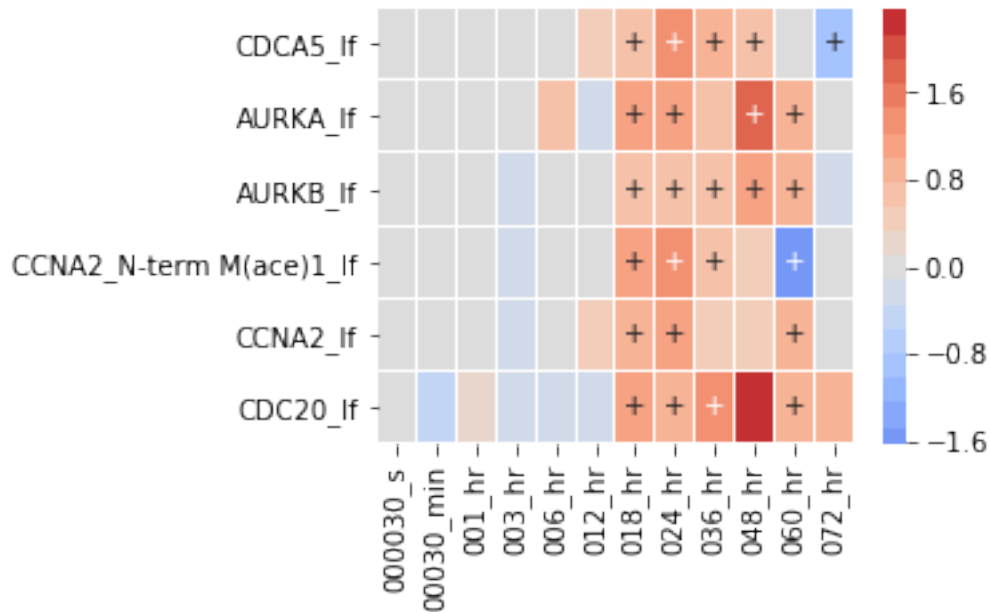

## 1.2.8 Examples

Here are a few examples how all the above commands can be chained together to create plots with varying degrees of criteria.

### Query 1:

Heatmap of label-free proteomics that are significantly change in at least 3 time points. Extract clusters and visualize separately.

```
In [33]: lf_sig = exp_data.label_free.require_n_sig(
    index='label',
    columns='sample_id',
    n_sig=3
)
fig = lf_sig.heatmap(
    convert_to_log=True,
    cluster_row=True,
    index='label',
```

```
values='fold_change',
columns='sample_id',
annotate_sig=True,
figsize=(8, 12),
div_colors=True,
num_colors=21,
linewidths=0.01
);
for i, j in fig.row_clusters.items():
    lf_sig.heatmap(j, index='label', linewidths=0.01, figsize=(6, 8))
plt.show()
```



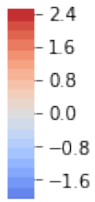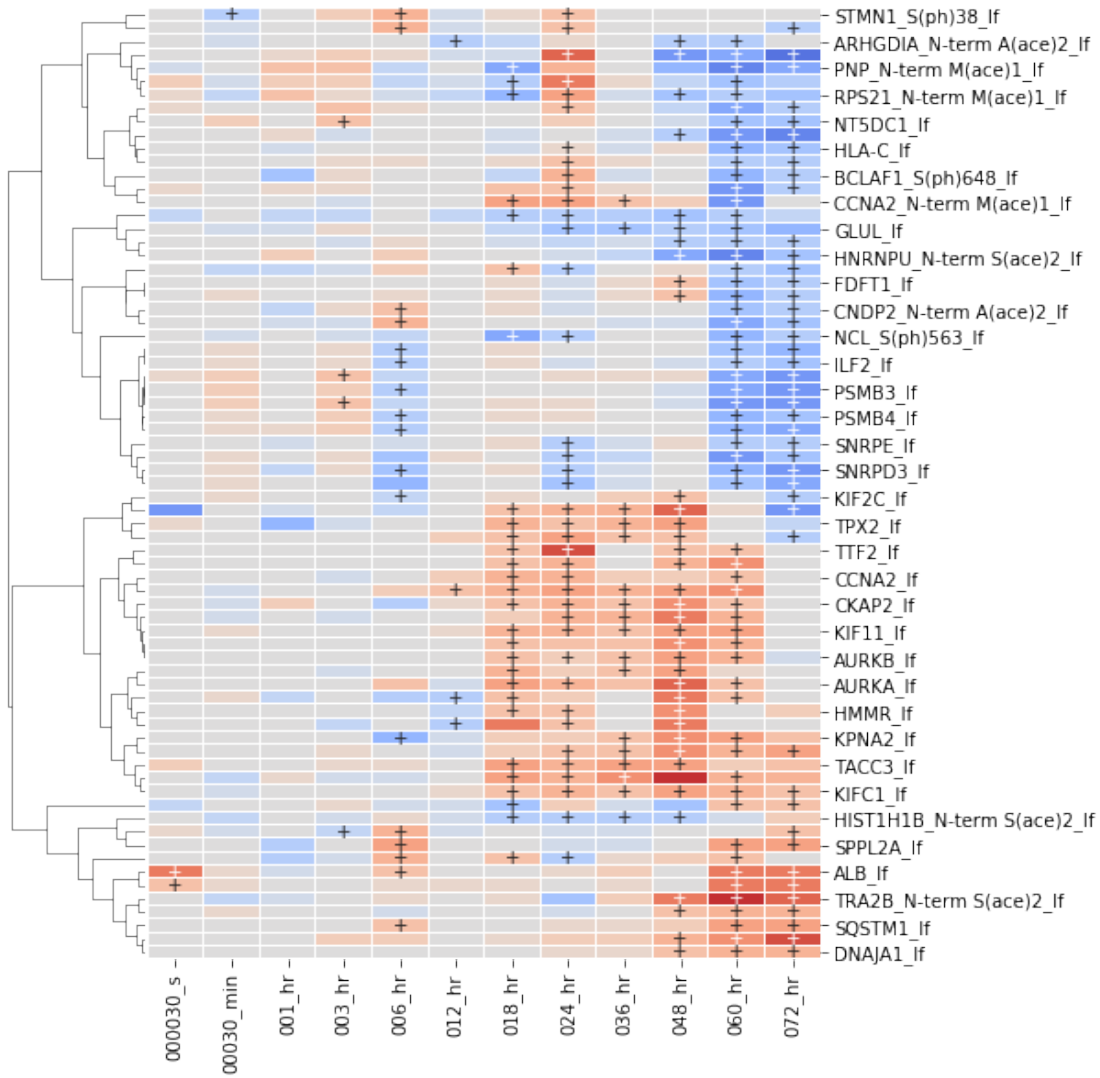

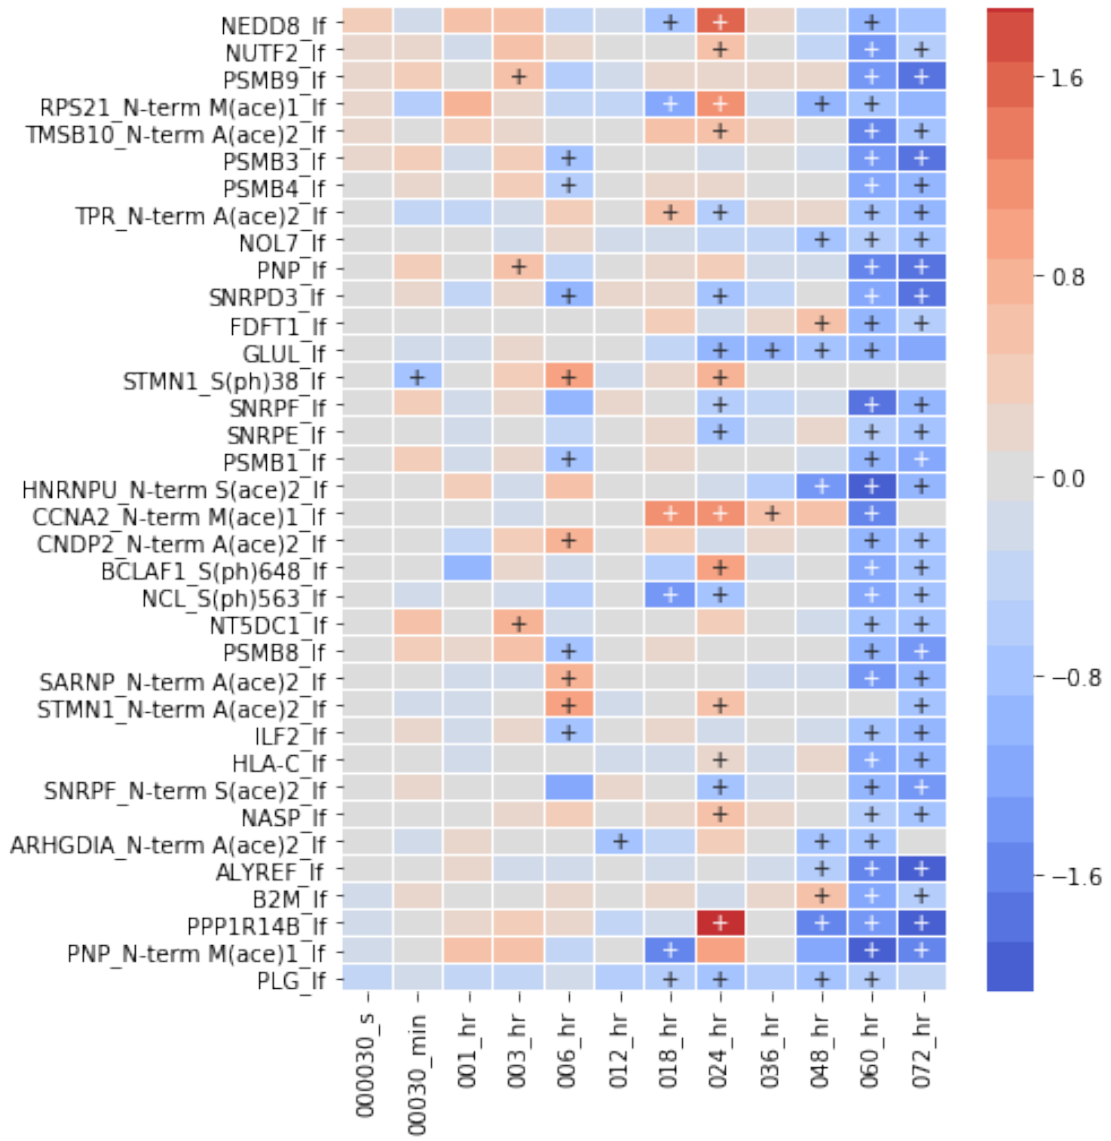

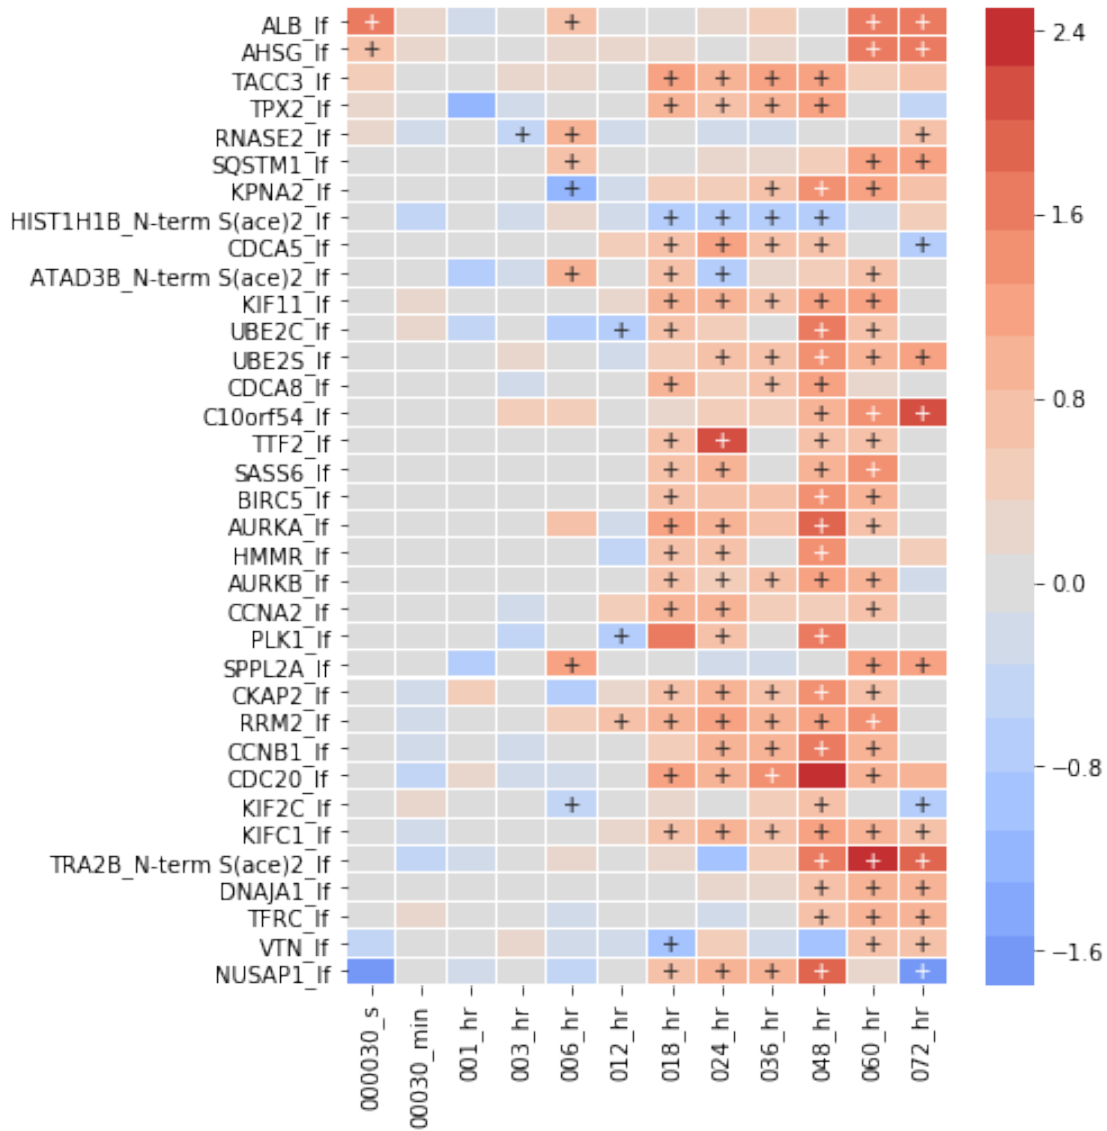

**Query 2:**

Changes that happen at all 2 timepoints for silac.

```
In [34]: exp_data.silac.require_n_sig(
         n_sig=2, index='label'
         ).plot_species(plot_type='matplotlib');
```

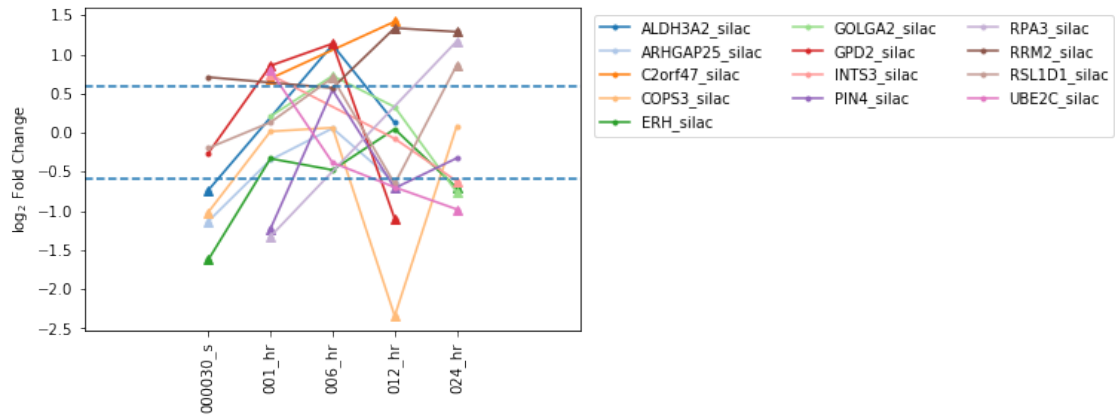

```
In [35]: int_species = 'CDK'
exp_data.label_free.heatmap(
    int_species,
    subset_index='identifier',
    index='label',
    min_sig=1,
    linewidths=0.01,
    figsize=(4, 3)
);
```

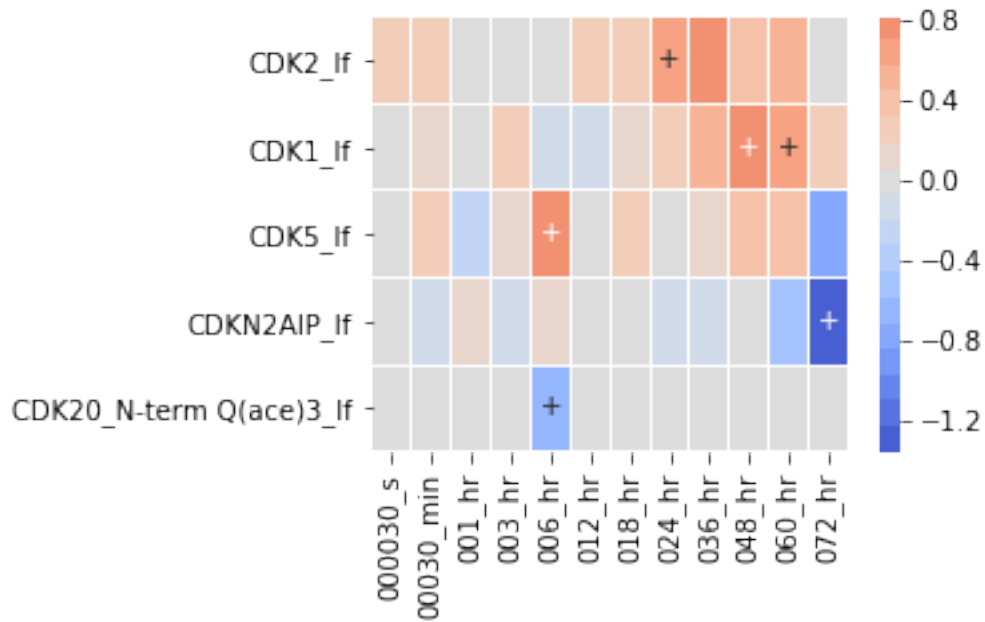

## 1.2.9 Extending to other plots

Since our `exp_data` is built off a `pandas.DataFrame`, we can use other packages that take that data format. Seaborn is one such tool that provides some very nice plots.

```
In [36]: label_free = exp_data.label_free.copy()
label_free.log2_normalize_df(column='fold_change', inplace=True)

g = sns.PairGrid(label_free,
                 x_vars=('sample_id'),
                 y_vars=('fold_change', 'p_value'),
                 hue='source',
                 aspect=3.25, height=3.5)

g.map(
    sns.violinplot,
    palette="pastel",
    split=True,
    order=label_free.sample_ids
);
```

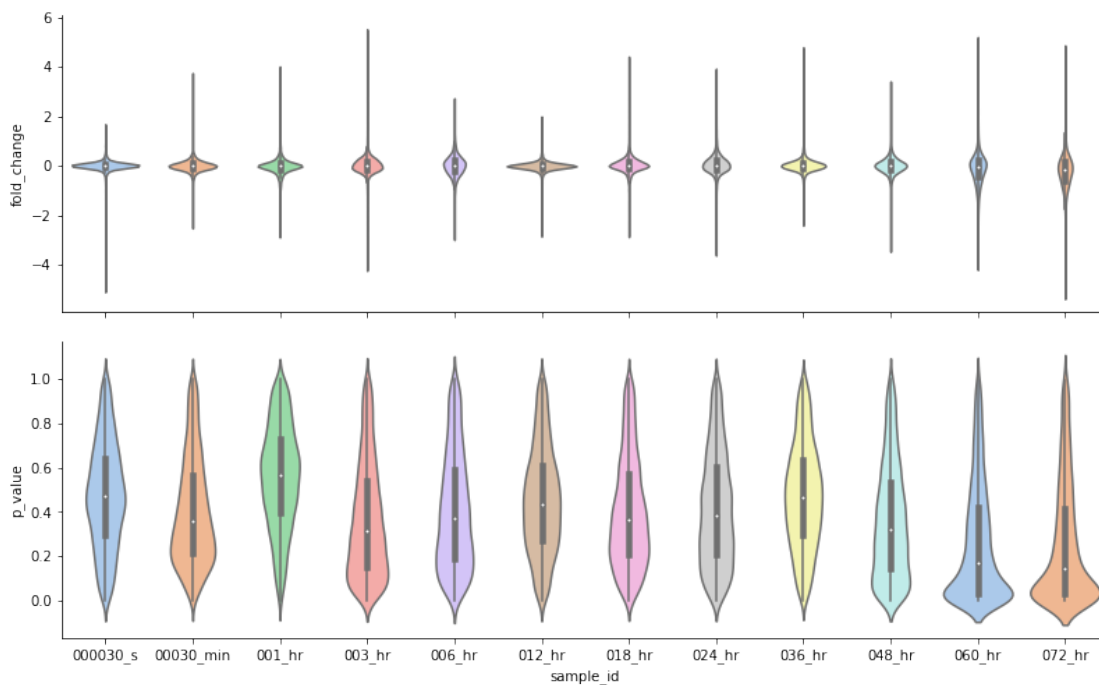

## Visualizing significant fraction of measured species

```
In [37]: fig = plt.figure(figsize=(5,5))
exp_data.label_free.plot_pie_sig_ratio('pie_label_free', fig.add_subplot(221))
plt.title("label_free");
exp_data.rna.plot_pie_sig_ratio('pie_rna_seq', fig.add_subplot(222))
```

```

plt.title("rna_seq");
exp_data.silac.plot_pie_sig_ratio('pie_silac', fig.add_subplot(223))
plt.title("silac");
exp_data.ph_silac.plot_pie_sig_ratio('pie_ph_silac', fig.add_subplot(224))
plt.title("ph_silac");
plt.savefig("pie_sig_omics.png", dpi=300, bbox_inches='tight')

```

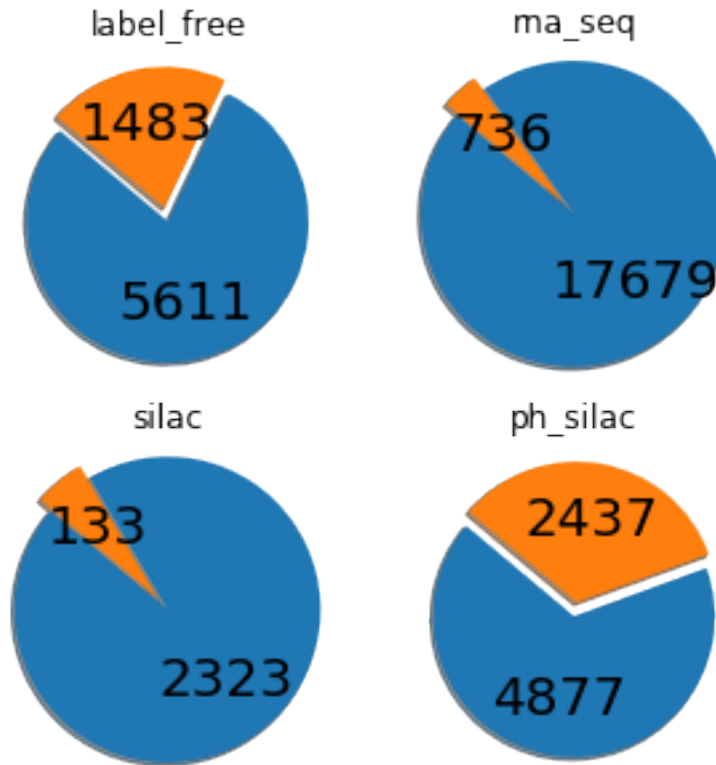

### Venn diagram comparisons between measurements

```
In [38]: from imagine.plotting.venn_diagram_maker import create_venn2, create_venn3
```

```

lf = exp_data.label_free.sig.id_list
silac = exp_data.silac.sig.id_list
phsilac = exp_data.ph_silac.sig.id_list
rna_names = exp_data.rna_seq.sig.id_list
hilic = exp_data.HILIC.sig.id_list
rplc = exp_data.C18.sig.id_list
fig = plt.figure(figsize=(8,6))

create_venn3(lf, silac, phsilac, 'LF', 'SILAC', 'ph-SILAC', ax=fig.add_subplot(221));
plt.title("Compare proteomics");
create_venn2(set.union(*[lf, silac, phsilac]), rna_names,

```

```

        'Protein', 'RNA', ax=fig.add_subplot(223));
plt.title("Compare rna vs protein");
create_venn2(hilic, rplc, 'HILIC', 'RPLC', ax=fig.add_subplot(122));
plt.title("Compare metabolomics");
plt.tight_layout()
plt.savefig("venn_diagrams.png", dpi=300, bbox_inches='tight')

```

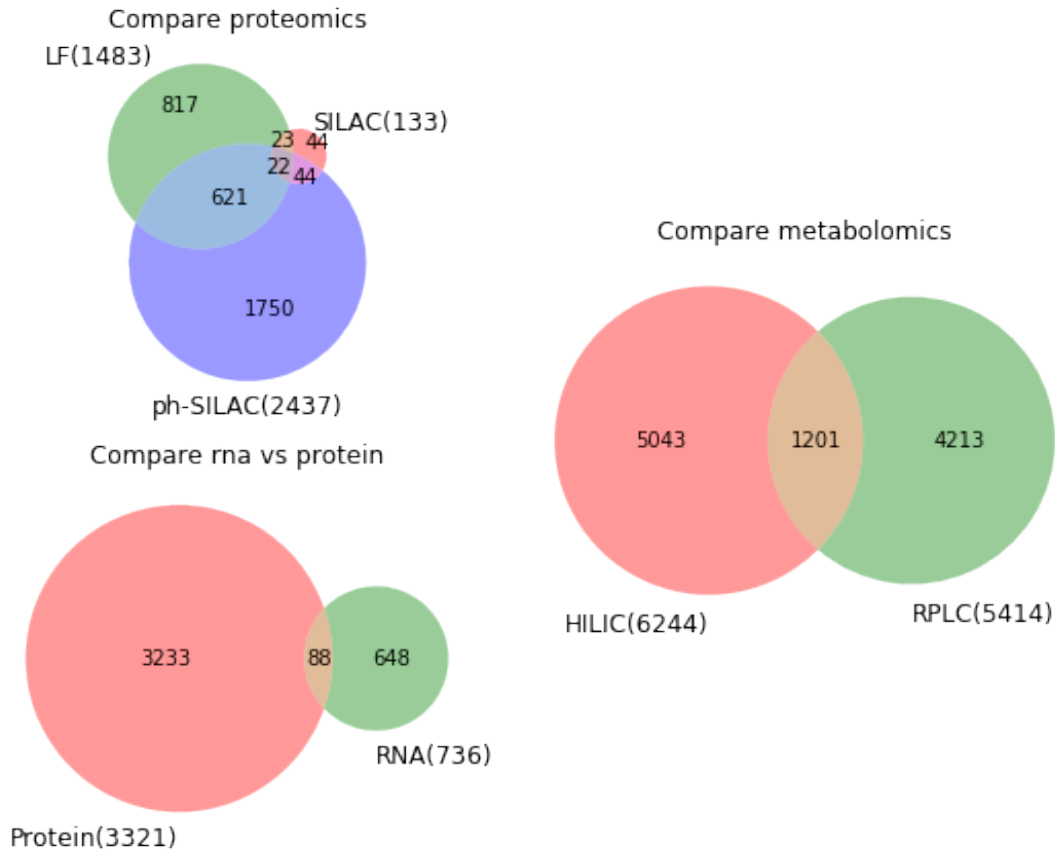

### Query 3:

Extract out species that are significantly changed in all three omics (label-free, silac, ph-s

```
In [39]: all_three_omics = lf.intersection(silac).intersection(phsilac)
```

```
In [40]: exp_data.species.subset(all_three_omics).heatmap(
    all_three_omics,
    subset_index='identifier',
    columns=['source', 'sample_id',],
    min_sig=0,
    figsize=(8, 12), cluster_row=True,
    y_tick_labels=True, linewidths=0.01
);
```

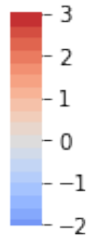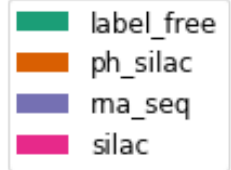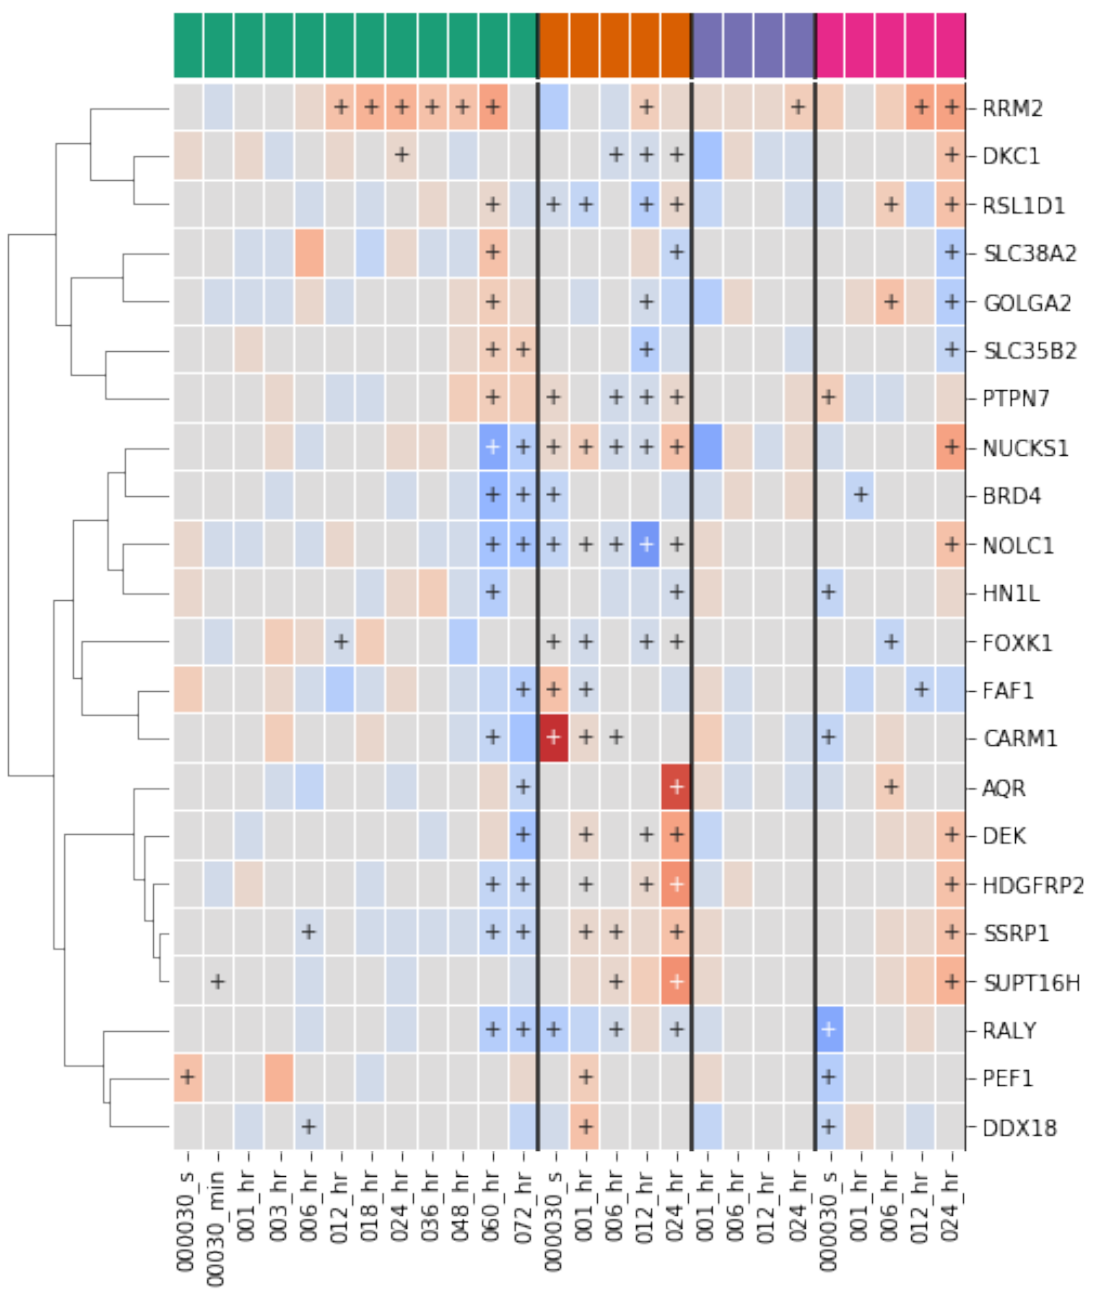



### 1.2.10 Plot lists of interest

```
In [41]: # sample list for demo purposes  
mrn_complex = ['NBN', 'RAD50', 'MRE11A']
```

```
exp_data.species.heatmap(  
    mrn_complex,  
    index='label',  
    subset_index='identifier',  
    min_sig=1,  
    linewidths=0.01,  
    figsize=(4,6)  
);
```

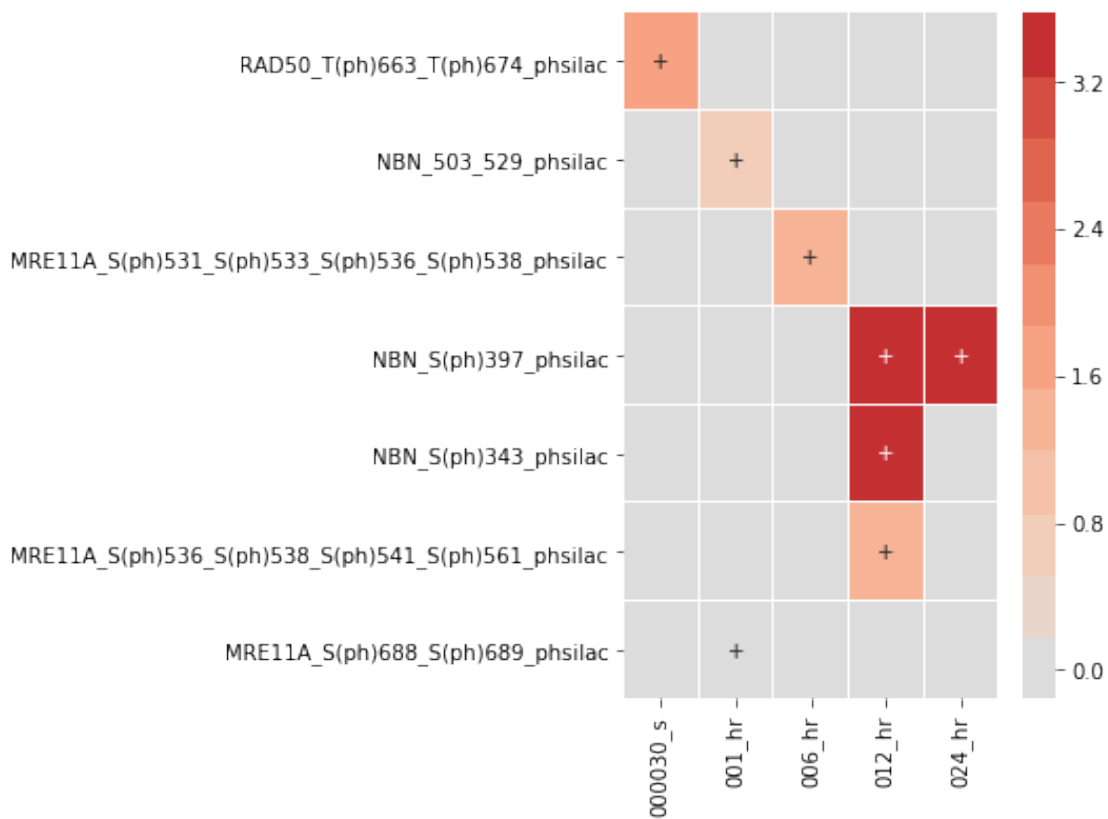

```
In [42]: # sample list for demo purposes  
interesting_list = ['CHEK1', 'CHEK2']
```

```
exp_data.species.heatmap(  
    interesting_list,  
    index='label',  
    subset_index='identifier',
```

```

min_sig=1,
linewidths=0.01,
figsize=(4,6)
);

```

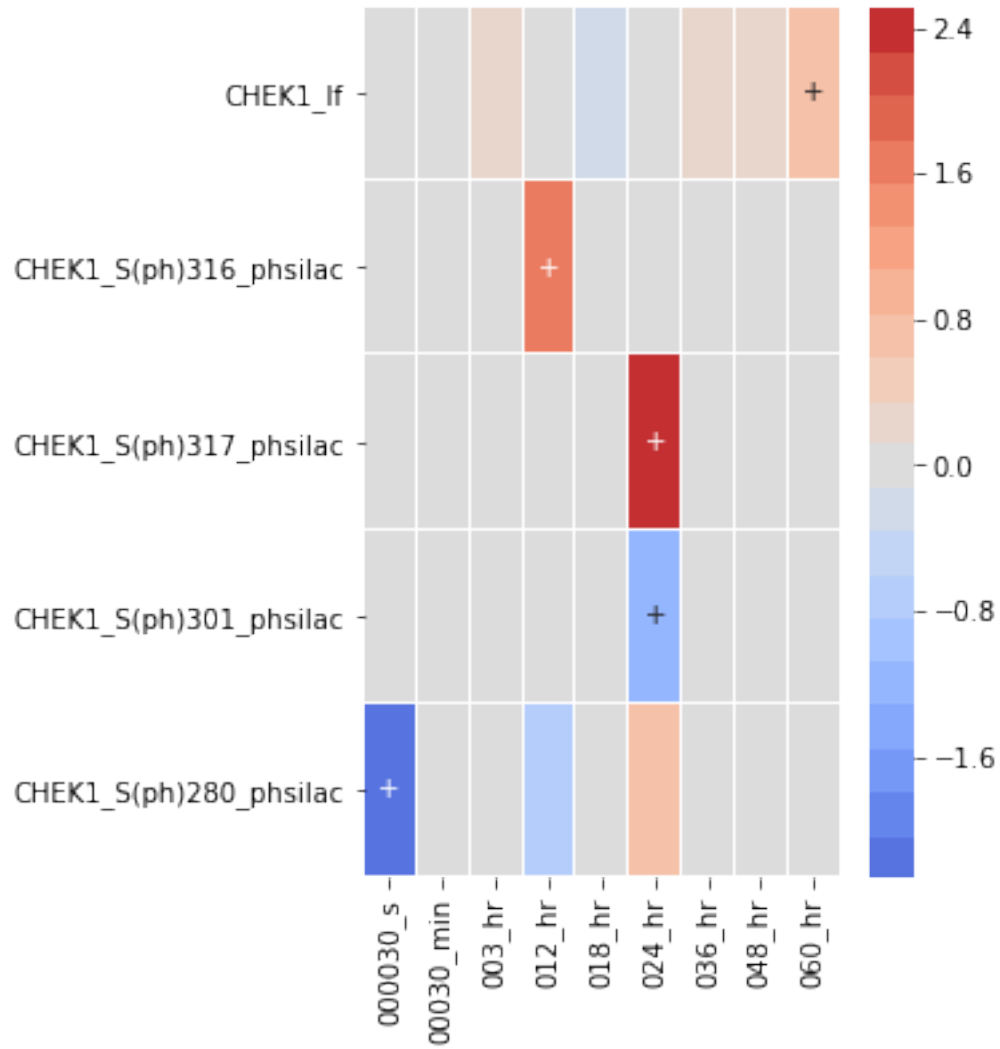

```

In [43]: # sample list for demo purposes
interesting_list = ['ATRIP', 'ERCC5']

```

```

exp_data.species.heatmap(
    interesting_list,
    index='label',
    subset_index='identifier',
    min_sig=1,
    linewidths=0.01,

```

```
    figsize=(4,6)
);
```

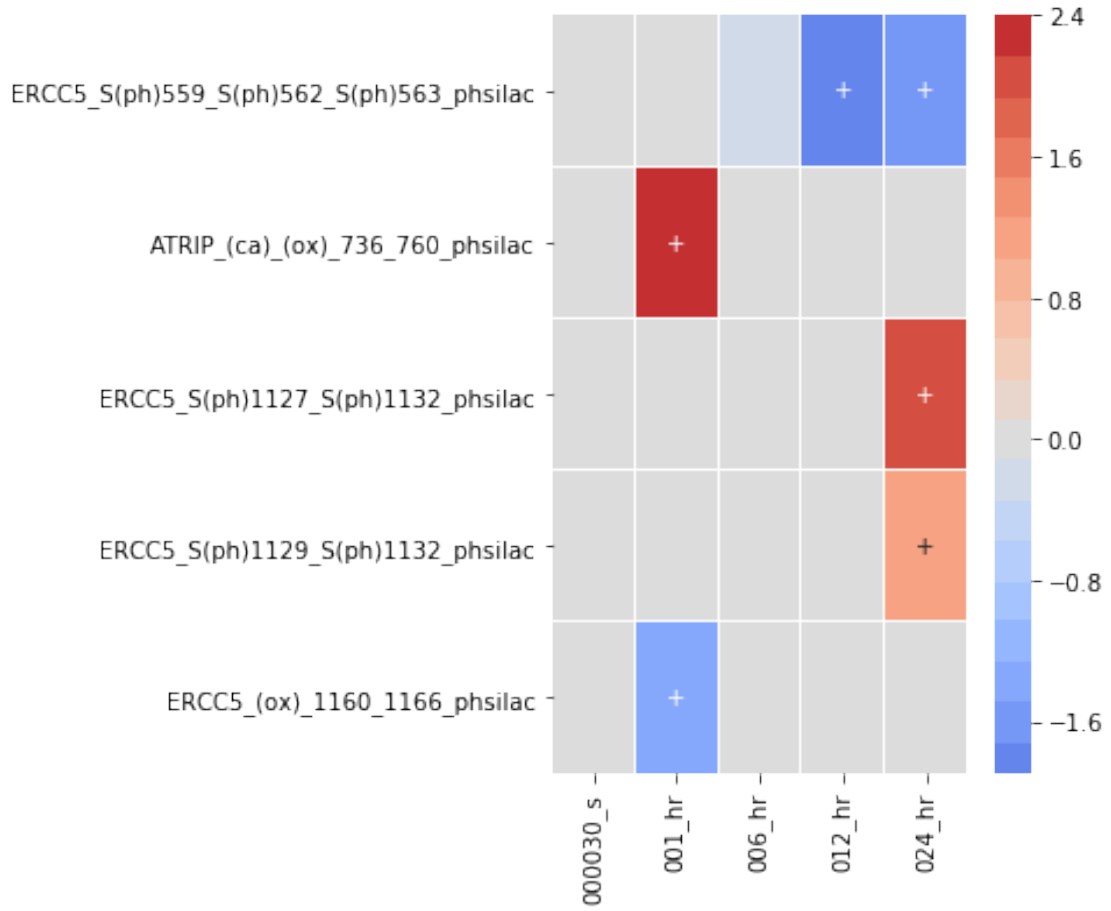

# Data S2. Network construction and exploration demonstration. Related to STAR METHODS and Figure 2.

## 1 Creating a data driven network

This example shows how we create and add annotations to a data driven network.

```
[2]: %matplotlib inline
import sys
import os
import networkx as nx
from IPython.display import display, Image
```

```
[3]: # NBVAL_IGNORE_OUTPUT
from exp_data import exp_data
import magine.networks.utils as utils
from magine.networks.network_generator import build_network
from magine.networks.subgraphs import Subgraph
import magine.networks.exporters as exporters
import magine.networks.visualization as viz
```

```
2019-07-01 11:14:25.012 - magine - INFO - Logging started on MAGINE
```

```
2019-07-01 11:14:25.015 - magine - INFO - Log entry time offset from UTC: -7.00
hours
```

Creating list of seed species and background species for network

```
[4]: measured = exp_data.species.id_list
sig_measured = exp_data.species.sig.id_list
print(len(measured))
print(len(sig_measured))
```

```
54750
```

```
14136
```

Now we will create the network. We pass the seed and background list to the network as well as flags turning on all of the network databases. We also trim source/sink nodes (optional). This basically cleans up dangling nodes that are not in our seed or background lists.

```
[5]: save_name = 'bendamustine_network_w_attributes'

execute = False
```

```

if execute:
    network = build_network(
        seed_species=sig_measured, # seed species
        all_measured_list=measured, # all data measured
        use_biogrid=True, # expand with biogrid
        use_hmdb=True, # expand with hmdb
        use_reactome=True, # expand with reactome
        use_signor=True, # expand with signor
        trim_source_sink=True, # remove all source and sink nodes not measured
        save_name='Networks/bendamustine_network'
    )
    # add data to networks
    network = utils.add_data_to_graph(network, exp_data)

    # write to GML for cytoscape or other program
    nx.write_gml(network, os.path.join('Networks', save_name+'.gml'))

    # write to gpickle for fast loading in python
    nx.write_gpickle(network, os.path.join('Networks', save_name+'.p'))
else:
    network = nx.read_gpickle(os.path.join('Networks', save_name+'.p'))

```

```

[7]: print(len(network.nodes))
      print(len(network.edges))

```

```

21130
515061

```

21130 nodes and 515061 edges are too much to manually explore. Thus, we are going to use the Subgraph Class to being to query the network.

```

[8]: # initialize it
      net_sub = Subgraph(network)

```

```

[10]: help(net_sub)

```

Help on Subgraph in module magine.networks.subgraphs object:

```

class Subgraph(builtins.object)
|   Subgraph(network, exp_data=None, pool=None)
|
|   Methods defined here:
|
|   __init__(self, network, exp_data=None, pool=None)
|       Generates network subgraphs
|
|       Parameters
|       -----

```

```

|     network : networkx.DiGraph
|     exp_data : magine.data.datatypes.ExperimentalData
|
|     downstream_of_node(self, species_1, include_list=None, save_name=None,
draw=False)
|         Generate network of all downstream species of provides species
|
|         Parameters
|         -----
|         species_1 : str
|             species name
|         save_name : str
|             name to save gml file
|         draw : bool
|             create figure of graph
|         include_list : list_like
|             list of species that must be in path in order to consider a path
|         Returns
|         -----
|         nx.DiGraph
|
|         Examples
|         -----
|         >>> from networkx import DiGraph
|         >>> from magine.networks.subgraphs import Subgraph
|         >>> g = DiGraph()
|         >>> g.add_edges_from([('a','b'),('b','c'), ('c', 'd'), ('a', 'd'),
('e', 'd')])
|         >>> net_sub = Subgraph(g)
|         >>> downstream_d = net_sub.downstream_of_node('d')
|         >>> sorted(downstream_d.edges)
|         []
|         >>> downstream_c = net_sub.downstream_of_node('c')
|         >>> sorted(downstream_c.edges)
|         [('c', 'd')]
|
|     expand_neighbors(self, network=None, nodes=None, upstream=False,
downstream=False, max_dist=1, include_only=None,
add_interconnecting_edges=False)
|         Create/expand a network based on neighbors from a list of species
|
|         Parameters
|         -----
|         network : nx.DiGraph or None
|             Starting network to expand nodes. If not provided, will use
|             default network

```

```

|     nodes : list_like
|         List of nodes to expand
|     upstream : bool
|         Expand upstream nodes
|     downstream : bool
|         Expand downstream nodes
|     max_dist :
|         Max distance to explore
|     include_only : list_like
|         Limit network to only contain these species
|     add_interconnecting_edges : bool
|         Add edges connecting all nodes. Default if False, so only direct
|         edges to neighbors will be added.
|
|     Returns
|     -----
|     nx.DiGraph
|
| measured_networks_over_time(self, graph, colors, prefix)
|     Adds color to a network over time
|
|     Parameters
|     -----
|     graph : nx.DiGraph
|     colors : list
|         List of colors for time points
|     prefix : str
|         Prefix for image files
|
|     Returns
|     -----
|
| measured_networks_over_time_up_down(self, graph, prefix, color_up='tomato',
color_down='lightblue')
|     Parameters
|     -----
|     graph : nx.DiGraph
|
|     prefix : str
|         Prefix for image files
|     color_up : str
|
|     color_down : str
|
|     Returns
|     -----

```

```

|
| neighbors(self, node, upstream=True, downstream=True, max_dist=1,
include_only=None, start_network=None)
|     Create network containing provided node and its neighbors.
|
|     Parameters
|     -----
|     node : str
|     upstream : bool
|     downstream : bool
|     max_dist : int
|     include_only : list
|     start_network : nx.DiGraph
|
|     Returns
|     -----
|     nx.DiGraph
|
| paths_between_list(self, species_list, single_path=False, max_length=None,
add_interconnecting_edges=False, include_only=None, pool=None, save_name=None,
draw=False, image_format='png')
|     Returns graph containing all shortest paths between list.
|
|     Parameters
|     -----
|
|     species_list : list_like
|         list of species
|     save_name : str
|         name to save
|     single_path : bool
|         use single shortest path if True, else use all shortest paths
|     draw : bool
|         create a dot generated figure
|     image_format : str
|         dot acceptable output formats, (pdf, png, etc)
|     pool : multiprocessing.Pool
|         If it is provided, it uses its map function to run this function.
|     max_length : int
|         Max length for path between any 2 species
|     include_only : list_like
|         List of species that must be present
|     Returns
|     -----
|     graph : networkx.DiGraph
|         graph containing paths between species list provided
|

```



```

|
| Examples
| -----
| >>> from networkx import DiGraph
| >>> from magine.networks.subgraphs import Subgraph
| >>> g = DiGraph()
| >>> g.add_edges_from([('a','b'),('b','c'), ('c', 'd'), ('a', 'd'), ('e',
'd')])
| >>> g.add_path(['g', 'h', 'c', 'i', 'j', 'k'])
| >>> net_sub = Subgraph(g)
| >>> path_a_d = net_sub.paths_between_list(['a','c','d'])
| >>> sorted(path_a_d.edges)
| [('a', 'b'), ('a', 'd'), ('b', 'c'), ('c', 'd')]
| >>> path_a_f = net_sub.paths_between_list(['g', 'h', 'j'], max_length=4)
| >>> sorted(path_a_f.edges)
| [('c', 'i'), ('g', 'h'), ('h', 'c'), ('i', 'j')]
|
| paths_between_pair(self, node_1, node_2, bidirectional=False,
single_path=False, draw=False, image_format='png')
|     Generates a graph based on all shortest paths between two species.
|
|
| Parameters
| -----
| node_1 : str
|     name of first species
| node_2 : str
|     name of second species
| bidirectional : bool
|     If you want to search bidirectionally
| single_path : bool
|     If you only want a single shortest path
| draw : bool
|     create an image of returned network
| image_format : str, optional
|     If draw=True you can pass an image format. (pdf, png, svg).
|     default=png
|
| Returns
| -----
| graph : networkx.DiGraph
|
|
| Examples
| -----
| >>> from networkx import DiGraph
| >>> from magine.networks.subgraphs import Subgraph
| >>> g = DiGraph()

```

```

|     >>> g.add_edges_from([('a','b'),('b','c'), ('c', 'd'), ('e', 'd'),
| ('d', 'a')])
|     >>> net_sub = Subgraph(g)
|     >>> path_a_d = net_sub.paths_between_pair('a','d', False)
|     >>> sorted(path_a_d.edges)
|     [('a', 'b'), ('b', 'c'), ('c', 'd')]
|     >>> path_a_d = net_sub.paths_between_pair('a','d', True)
|     >>> sorted(path_a_d.edges)
|     [('a', 'b'), ('b', 'c'), ('c', 'd'), ('d', 'a')]
|
| paths_between_two_lists(self, list_1, list_2, single_path=False,
max_length=None, include_only=None, reverse=False,
add_interconnecting_edges=False, draw=False, save_name=None, image_format='png')
|     Generates a graph based on all shortest paths between two species.
|
|
| Parameters
| -----
| list_1 : list
|         Node names
| list_2 : list
|         Node names
| single_path : bool
|         If you only want a single shortest path.
| max_length : int
|         Maximum distance between any two species.
| include_only : list
|         Species required to be in paths/
| reverse : bool
|         Flag to check list_2 to list_1. Default will only look for list_1
|         to list_2.
| add_interconnecting_edges : bool
|         Add edges between species even if not between list_1 and list_2
|         nodes.
| save_name : str
|         Save of figure/network
| draw : bool
|         create an image of returned network
| image_format : str, optional
|         If draw=True you can pass an image format. (pdf, png, svg).
|         default=png
|
| Returns
| -----
| graph : networkx.DiGraph
|
| Examples
| -----

```

```

|     >>> from networkx import DiGraph
|     >>> from magine.networks.subgraphs import Subgraph
|     >>> g = DiGraph()
|     >>> g.add_path(['a', 'b', 'c', 'd'])
|     >>> g.add_path(['g', 'h', 'c', 'i'])
|     >>> net_sub = Subgraph(g)
|     >>> path_a_d = net_sub.paths_between_two_lists(['a','g'], ['c', 'i'],
max_length=3)
|     >>> sorted(path_a_d.edges)
|     [('a', 'b'), ('b', 'c'), ('g', 'h'), ('h', 'c')]
|
|     upstream_of_node(self, species_1, include_list=None, save_name=None,
draw=False)
|         Generate network of all upstream species of provides species
|
|         Parameters
|         -----
|         species_1 : str
|             species name
|         save_name : str
|             name to save gml file
|         draw : bool
|             create figure of graph
|         include_list : list_like
|             Species that must be in path in order to consider a path
|
|         Returns
|         -----
|         nx.DiGraph
|
|         Examples
|         -----
|         >>> from networkx import DiGraph
|         >>> from magine.networks.subgraphs import Subgraph
|         >>> g = DiGraph()
|         >>> g.add_edges_from([('a','b'),('b','c'), ('c', 'd'), ('a', 'd'),
('e', 'd')])
|         >>> net_sub = Subgraph(g)
|         >>> upstream_d = net_sub.upstream_of_node('d')
|         >>> sorted(upstream_d.edges())
|         [('a', 'd'), ('b', 'c'), ('c', 'd'), ('e', 'd')]
|         >>> upstream_c = net_sub.upstream_of_node('c')
|         >>> sorted(upstream_c.edges())
|         [('a', 'b'), ('b', 'c')]
|
|     -----
|     Data descriptors defined here:

```

```

|
|  __dict__
|      dictionary for instance variables (if defined)
|
|  __weakref__
|      list of weak references to the object (if defined)

```

## 1.1 Exploring neighbors of nodes of interest

For demonstration purposes, we are starting with the protein CASP3. CASP3 is an effector caspase that is required for apoptosis. It cleaves other proteins and starts the degradation [CASP3](#). We start our exploration at CASP3 as it is a marker for intrinsic apoptosis, which is what is generally regarded as bendamustines pathway for cell death.

First, we are going to look at all the neighbors of CASP3 that were significantly changed in our experimental data.

```
[23]: casp3_neighbors = net_sub.neighbors(
      'CASP3', # node of interest
      upstream=True, # include upstream nodes
      downstream=False, # include downstream nodes
      include_only=exp_data.species.sig.id_list # limit nodes to only significant
      →changed species
    )
```

```
[24]: # one of many ways to draw the network.
      # draw_cyjs is ideal for Jupyter notebooks since it allows us to move nodes,
      →apply various layouts
      # Notice that if you click on an edge, it provides you with the interaction
      →type.
      # If you click on a node, it provides a link to genecards.
      viz.draw_cyjs(casp3_neighbors)
```

<IPython.core.display.HTML object>

Next we can continue to expand this network to explore nodes of interest.

This next function expands a single node and creates plots of the species that are connected to thht node.

```
[61]: def show_neighbors(node, df, upstream=True, downstream=False, max_dist=1,
      include_only=None, figsize=None, show_network=False):

      neighbors = net_sub.expand_neighbors(
          network=None,
          nodes=node,
          upstream=upstream,
          downstream=downstream,
          max_dist=max_dist,
          include_only=include_only
```

```

)
df_copy = df.subset(neighbors.nodes).copy()

# remove nodes not connected to casp3
neighbors = utils.delete_disconnected_network(neighbors)

# moves a time point if no significant changes
df_copy.require_n_sig(n_sig=1, inplace=True, index='sample_id',
↳columns='label',)

# removes measured species if no significant changes
df_copy.require_n_sig(n_sig=1, index='label', inplace=True)
if show_network:
    # export image
    s_name = 'node_{}.png'.format(node)
    exporters.export_to_dot(neighbors, s_name, image_format='png',
↳engine='circo')

    # display image
    display(Image(s_name, width=400))

# create heatmap of the neighbor nodes
fig = df_copy.heatmap(
    rank_index=True,
    index='label',
    linewidths=0.01,
    figsize=figsize
);

show_neighbors('CYCS',
               exp_data.species,
               upstream=True,
               downstream=False,
               max_dist=1,
               include_only=exp_data.species.sig.id_list
)

```

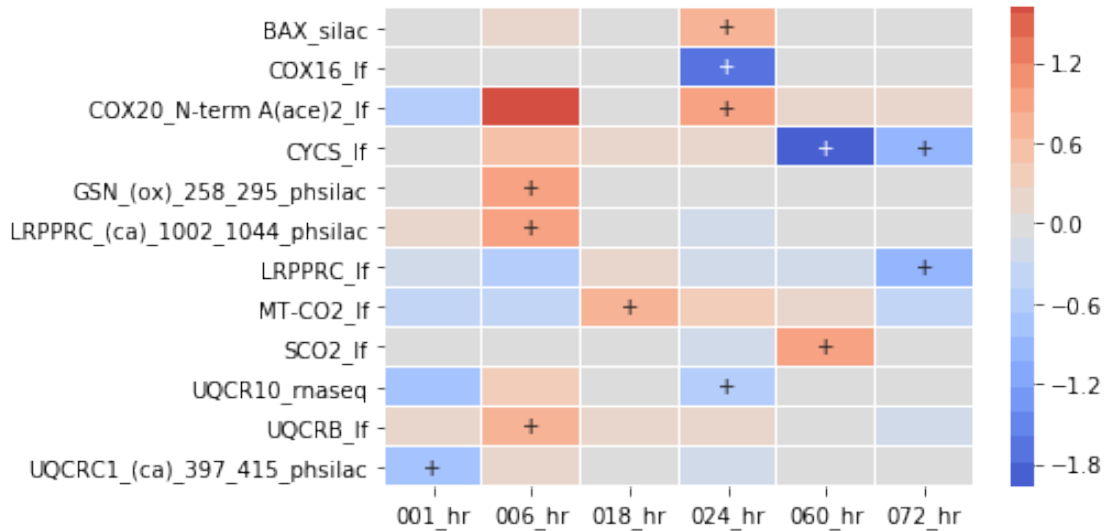

```
[62]: expand = net_sub.expand_neighbors(casp3_neighbors,
                                         nodes='CYCS',
                                         upstream=True,
                                         include_only=exp_data.species.sig.id_list)
```

```
[63]: viz.draw_cyjs(expand)
```

<IPython.core.display.HTML object>

```
[64]: expand = net_sub.expand_neighbors(expand, nodes='BAX', upstream=True,
                                         include_only=exp_data.species.sig.id_list)
viz.draw_cyjs(expand)
```

<IPython.core.display.HTML object>

```
[65]: expand = net_sub.expand_neighbors(expand, nodes='BID', upstream=True,
                                         include_only=exp_data.species.sig.id_list)
viz.draw_cyjs(expand)
```

<IPython.core.display.HTML object>

```
[67]: show_neighbors('CASP8',
                     exp_data.species,
                     upstream=True,
                     downstream=False,
                     max_dist=1,
```

```

include_only=exp_data.species.sig.id_list,
figsize=(6, 12)
)

```

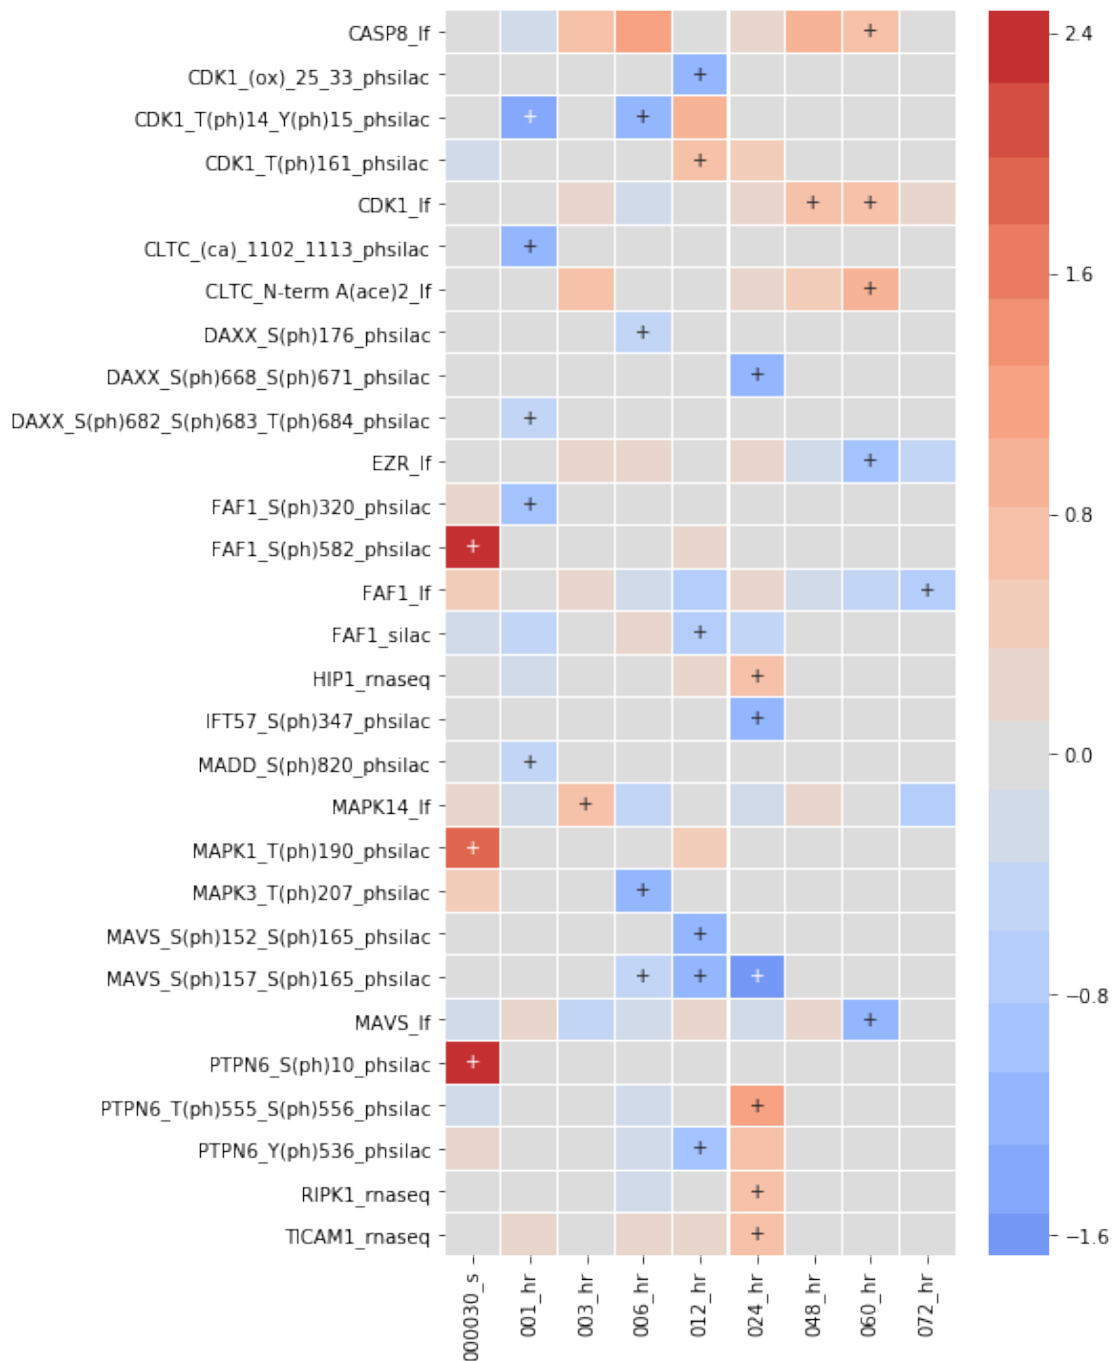

```

[68]: expand = net_sub.expand_neighbors(expand, nodes='CASP8', upstream=True,
→include_only=exp_data.species.sig.id_list)

```

```
viz.draw_cyjs(expand)
```

<IPython.core.display.HTML object>

```
[ ]: show_neighbors(['FAF1', 'MADD', 'DAXX'],  
                    exp_data.species,  
                    upstream=True,  
                    downstream=False,  
                    max_dist=1,  
                    include_only=exp_data.species.require_n_sig(n_sig=1).id_list,  
                    figsize=(8, 6)  
)
```

```
[79]: expand = net_sub.expand_neighbors(expand,  
                                         nodes=['FAF1', 'MADD', 'DAXX'],  
                                         upstream=True,  
                                         include_only=exp_data.species.sig.id_list)  
  
# NBVAL_IGNORE_OUTPUT  
viz.draw_cyjs(expand)
```

<IPython.core.display.HTML object>

```
[70]: show_neighbors('TNFRSF1B',  
                    exp_data.species,  
                    upstream=True,  
                    downstream=False,  
                    max_dist=1,  
                    include_only=exp_data.species.require_n_sig(n_sig=1).id_list,  
                    figsize=(8, 6)  
)
```



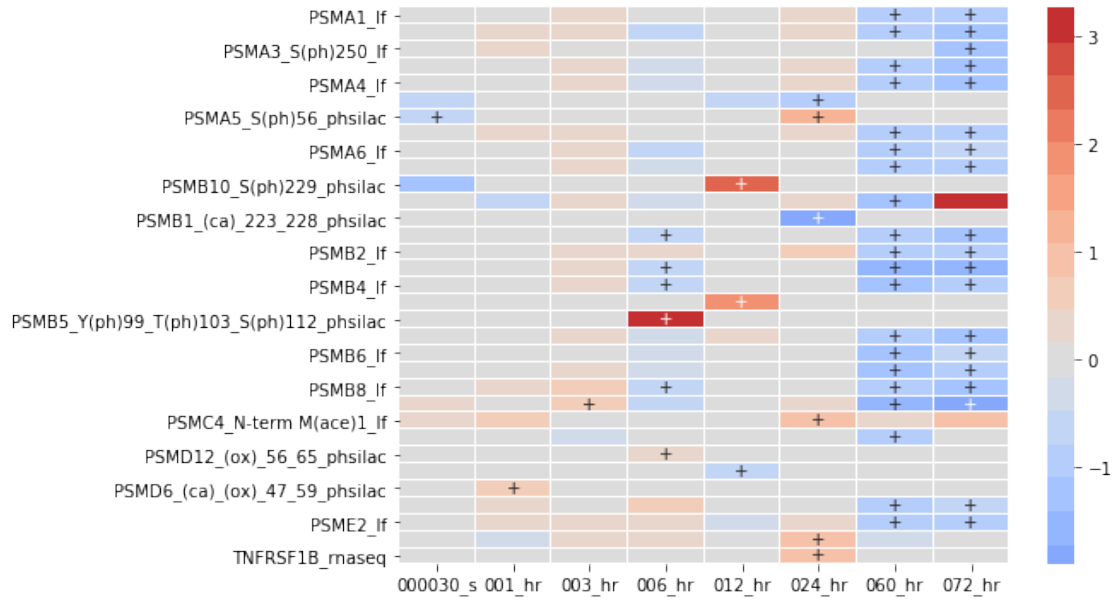

```
[71]: show_neighbors('AURKA',
                    exp_data.species,
                    upstream=True,
                    downstream=False,
                    max_dist=1,
                    include_only=exp_data.species.require_n_sig(n_sig=1).id_list,
                    figsize=(8, 12),
                    show_network=True
                    )
```



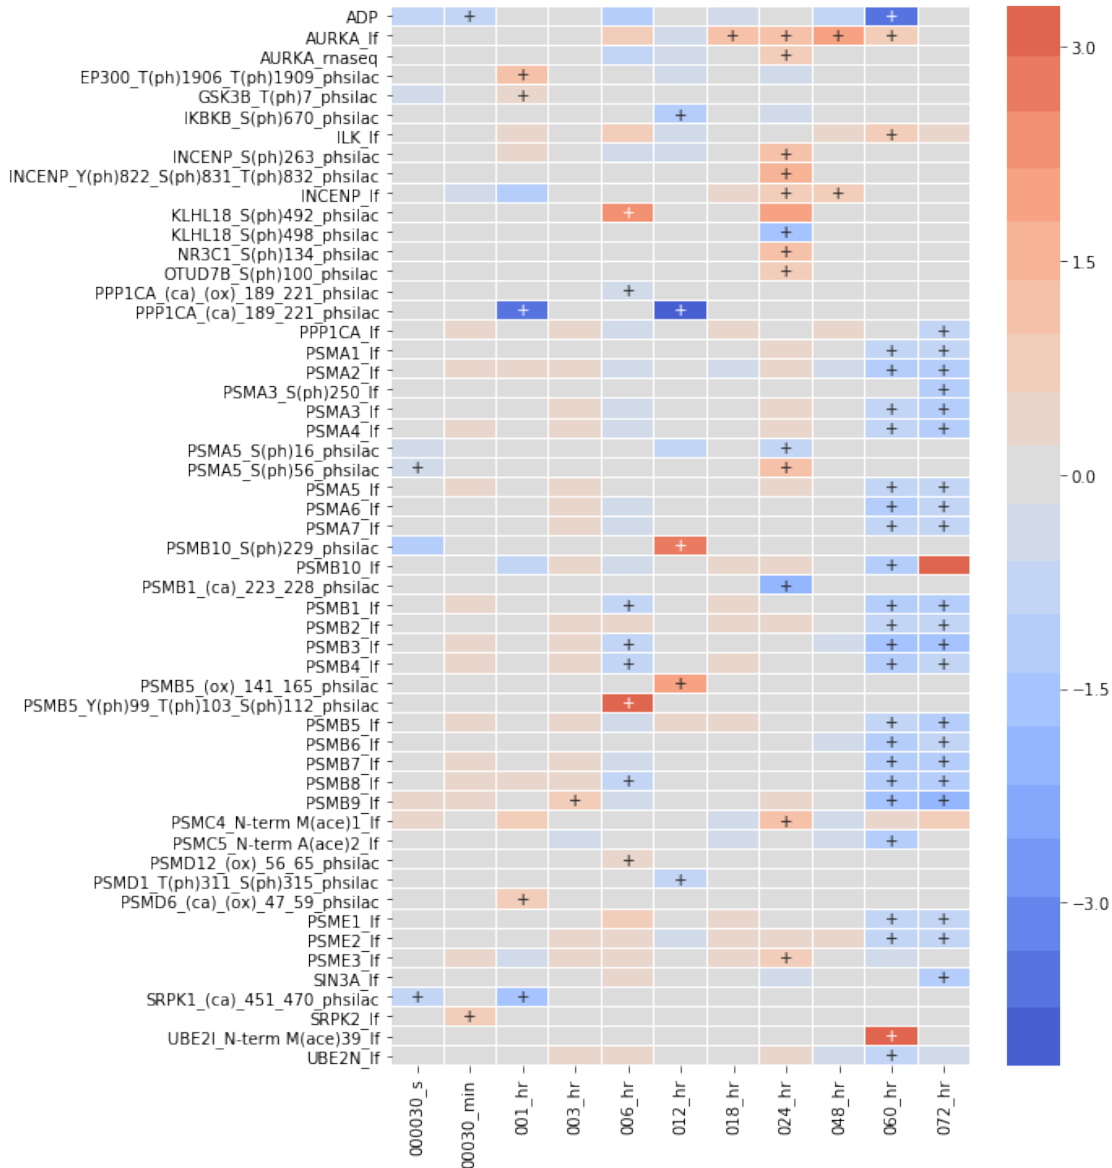

```
[83]: expand = net_sub.expand_neighbors(expand, nodes=['AURKA'], upstream=True,
    →include_only=exp_data.species.require_n_sig(n_sig=2).id_list)
# NBVAL_IGNORE_OUTPUT
viz.draw_cyjs(expand)
```

<IPython.core.display.HTML object>

This last network has gotten a little hard to explore. We can simplify it by just looking for a single path, in this case AURKA to CYCS

```
[87]: sub_g_2 = Subgraph(expand)
aurka_to_cycs = sub_g_2.paths_between_pair('AURKA', 'CYCS')
```

```
[88]: viz.draw_cyjs(aurka_to_cyjs)
```

# Data S3. Enrichment analysis demonstration. Related to Figure 4 and STAR methods.

December 6, 2019

```
[1]: from IPython.display import display
      %matplotlib inline

      import pandas as pd
      import numpy as np
      import networkx as nx
      import matplotlib.pyplot as plt
      import seaborn as sns
```

```
[2]: # load the experimental data
      from exp_data import exp_data
```

## 0.0.1 Running enrichment analysis via EnrichR

MAGINE allows users to upload lists of genes for analysis and retrieves the results in an `EnrichmentResult` Class.

```
[ ]: from magine.enrichment.enrichr import Enrichr
      e = Enrichr()
```

```
[8]: help(e)
```

Help on `Enrichr` in module `magine.enrichment.enrichr` object:

```
class Enrichr(builtins.object)
|   Enrichr(verbose=False)
|
|   Methods defined here:
|
|   __init__(self, verbose=False)
|       Initialize self.  See help(type(self)) for accurate signature.
|
|   print_valid_libs(self)
|       Print a list of all available libraries EnrichR has to offer.
|
|   run(self, list_of_genes, gene_set_lib='GO_Biological_Process_2017')
|       Parameters
|       -----
```

```

| list_of_genes : list_like
|     List of genes using HGNC gene names
| gene_set_lib : str or list
|     Name of gene set library
|     To print options use Enrichr.print_valid_libs
|
|
| Examples
| -----
| >>> import pandas as pd
| >>> pd.set_option('display.max_colwidth', 40)
| >>> pd.set_option('precision', 3)
| >>> e = Enrichr()
| >>> df = e.run(['BAX', 'BCL2', 'CASP3', 'CASP8'],
gene_set_lib='Reactome_2016')
| >>> print(df[['term_name', 'combined_score']].head(5))#doctest:
+NORMALIZE_WHITESPACE
|
|             term_name  combined_score
| 0  intrinsic pathway for apoptosis_hsa_...    48.157
| 1  programmed cell death_hsa_r-hsa-5357801    41.516
| 2                apoptosis_hsa_r-hsa-109581    41.403
| 3  caspase-mediated cleavage of cytoske...    27.349
| 4  caspase activation via extrinsic apo...    22.438
|
| Returns
| -----
| df : EnrichmentResult
|     Results from enrichR
|
| run_samples(self, sample_lists, sample_ids,
gene_set_lib='GO_Biological_Process_2017', save_name=None, create_html=False,
out_dir=None, run_parallel=False, exp_data=None, pivot=False)
|     Run enrichment analysis on a list of samples.
|
| Parameters
| -----
| sample_lists : list_like
|     List of lists of genes for enrichment analysis
| sample_ids : list
|     list of ids for the provided sample list
| gene_set_lib : str, list
|     Type of gene set, refer to Enrichr.print_valid_libs
| save_name : str, optional
|     if provided it will save a file as a pivoted table with
|     the term_ids vs sample_ids
| create_html : bool
|     Creates html of output with plots of species across sample
| out_dir : str

```

```

|         If create_html, it will place all html plots into this directory
| run_parallel : bool
|         If create_html, it will create plots using multiprocessing
| exp_data : magine.data.ExperimentalData
|         Must be provided if create_html=True
| pivot : bool
|
| Examples
| -----
| .. plot::
|     :context: close-figs
|
|     >>> import pandas as pd
|     >>> import matplotlib.pyplot as plt
|     >>> from magine.enrichment.enrichr import Enrichr
|     >>> pd.set_option('display.max_colwidth', 40)
|     >>> pd.set_option('precision', 3)
|     >>> samples = [['BAX', 'BCL2', 'CASP3', 'CASP8'], ['ATR', 'ATM',
| 'TP53', 'CHEK1']]
|     >>> sample_ids = ['apoptosis', 'dna_repair']
|     >>> e = Enrichr()
|     >>> df = e.run_samples(samples, sample_ids,
| gene_set_lib='Reactome_2016')
|     >>> print(df[['term_name', 'combined_score']].head(5))#doctest:
+NORMALIZE_WHITESPACE
|
|                                     term_name  combined_score
|          0  intrinsic pathway for apoptosis_hsa_...      48.157
|          1  programmed cell death_hsa_r-hsa-5357801      41.516
|          2          apoptosis_hsa_r-hsa-109581      41.403
|          3  caspase-mediated cleavage of cytoske...      27.349
|          4  caspase activation via extrinsic apo...      22.438
|     >>> df.filter_multi(rank=10, inplace=True)
|     >>> df['term_name'] = df['term_name'].str.split('_').str.get(0)
|     >>> fig = df.sig.heatmap(figsize=(6, 6), linewidths=.05)
|
| Returns
| -----
| EnrichmentResult
|
| -----
| Data descriptors defined here:
|
| __dict__
|     dictionary for instance variables (if defined)
|
| __weakref__
|     list of weak references to the object (if defined)

```

```
[5]: # from supplement_notebook_1
exp_data.label_free.heatmap(
    index='label',
    linewidths=0.01,
    cluster_row=True,
    min_sig=4,
    figsize=(4, 8)
);
```

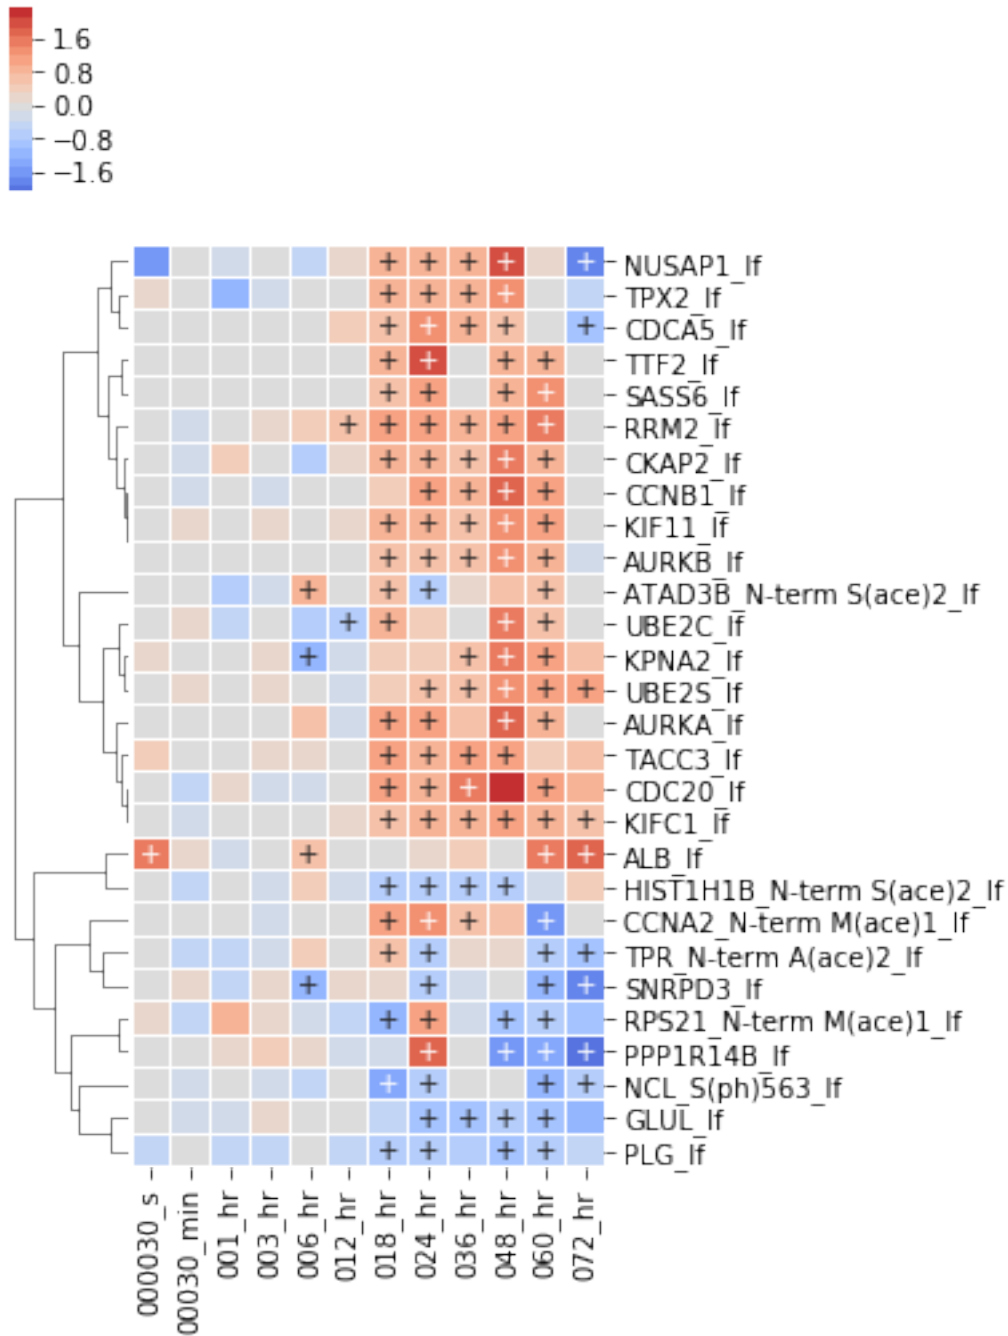



```
[10]: df = e.run_samples(
    [exp_data.label_free.up.require_n_sig(n_sig=4).id_list,
     exp_data.label_free.down.require_n_sig(n_sig=4).id_list,],
    ['label_free_up', 'label_free_down'],
    gene_set_lib='Reactome_2016')
df.term_name = df.term_name.str.split('_').str.get(0)
```

```
[ ]: df.heatmap(
    min_sig=1,
    linewidths=0.01,
    convert_to_log=False,
    figsize=(3, 12)
);
print(up_only.shape)
```

```
[24]: df.head(10)
```

```
[24]:
```

|   | term_name                                         | rank | p_value      | \ |
|---|---------------------------------------------------|------|--------------|---|
| 0 | cell cycle, mitotic                               | 1    | 1.545920e-09 |   |
| 1 | cell cycle                                        | 2    | 7.603575e-09 |   |
| 2 | apc/c-mediated degradation of cell cycle proteins | 3    | 7.316318e-09 |   |
| 3 | regulation of mitotic cell cycle                  | 4    | 7.316318e-09 |   |
| 4 | resolution of sister chromatid cohesion           | 5    | 1.279403e-06 |   |
| 5 | mitotic prometaphase                              | 6    | 1.746644e-06 |   |
| 6 | regulation of tp53 activity through phosphoryl... | 7    | 8.341746e-07 |   |
| 7 | transcriptional regulation by tp53                | 8    | 8.074179e-06 |   |
| 8 | g2/m transition                                   | 9    | 1.178583e-05 |   |
| 9 | mitotic g2-g2/m phases                            | 10   | 1.233244e-05 |   |

|   | z_score   | combined_score | adj_p_value  | \ |
|---|-----------|----------------|--------------|---|
| 0 | -2.477071 | 50.253950      | 2.056073e-07 |   |
| 1 | -2.434067 | 45.504030      | 2.528189e-07 |   |
| 2 | -2.284682 | 42.799318      | 2.528189e-07 |   |
| 3 | -2.274341 | 42.605591      | 2.528189e-07 |   |
| 4 | -2.047109 | 27.777462      | 2.836010e-05 |   |
| 5 | -1.999010 | 26.502501      | 3.318624e-05 |   |
| 6 | -1.893455 | 26.502358      | 2.218904e-05 |   |
| 7 | -2.238861 | 26.254767      | 1.145954e-04 |   |
| 8 | -2.098984 | 23.820552      | 1.261703e-04 |   |
| 9 | -2.099087 | 23.726560      | 1.261703e-04 |   |

|   | genes                                                | n_genes | db            | \ |
|---|------------------------------------------------------|---------|---------------|---|
| 0 | AURKA, AURKB, CCNA2, CCNB1, CDC20, CDCA5, RRM2, TPX2 | 8       | Reactome_2016 |   |
| 1 | AURKA, AURKB, CCNA2, CCNB1, CDC20, CDCA5, RRM2, TPX2 | 8       | Reactome_2016 |   |
| 2 | AURKA, AURKB, CCNA2, CCNB1, CDC20                    | 5       | Reactome_2016 |   |
| 3 | AURKA, AURKB, CCNA2, CCNB1, CDC20                    | 5       | Reactome_2016 |   |

|   |                              |   |               |
|---|------------------------------|---|---------------|
| 4 | AURKB,CCNB1,CDC20,CDCA5      | 4 | Reactome_2016 |
| 5 | AURKB,CCNB1,CDC20,CDCA5      | 4 | Reactome_2016 |
| 6 | AURKA,AURKB,CCNA2,TPX2       | 4 | Reactome_2016 |
| 7 | AURKA,AURKB,CCNA2,CCNB1,TPX2 | 5 | Reactome_2016 |
| 8 | AURKA,CCNA2,CCNB1,TPX2       | 4 | Reactome_2016 |
| 9 | AURKA,CCNA2,CCNB1,TPX2       | 4 | Reactome_2016 |

|   | significant | sample_id     |
|---|-------------|---------------|
| 0 | True        | label_free_up |
| 1 | True        | label_free_up |
| 2 | True        | label_free_up |
| 3 | True        | label_free_up |
| 4 | True        | label_free_up |
| 5 | True        | label_free_up |
| 6 | True        | label_free_up |
| 7 | True        | label_free_up |
| 8 | True        | label_free_up |
| 9 | True        | label_free_up |

If we look at the top ranked terms, we see that some of them have similar descriptions cell cycle, cell cycle, mitotic, regulation of mitotic cell cycle. If we look at the gene list, we can also see that some of the genes are similar. To see if there are redundant terms that are enriched, we can calculate their similarity with the Jaccard Index (intersection over union).

```
[22]: d = df.find_similar_terms('cell cycle', remove_subset=False )
      display(d.head(20))
```

|    | term_name                                         | similarity_score |
|----|---------------------------------------------------|------------------|
| 0  | cell cycle, mitotic                               | 1.000            |
| 2  | regulation of mitotic cell cycle                  | 0.625            |
| 23 | generic transcription pathway                     | 0.625            |
| 52 | gene expression                                   | 0.625            |
| 6  | transcriptional regulation by tp53                | 0.625            |
| 1  | apc/c-mediated degradation of cell cycle proteins | 0.625            |
| 8  | mitotic g2-g2/m phases                            | 0.500            |
| 11 | m phase                                           | 0.500            |
| 9  | regulation of tp53 activity                       | 0.500            |
| 7  | g2/m transition                                   | 0.500            |
| 5  | regulation of tp53 activity through phosphoryl... | 0.500            |
| 4  | mitotic prometaphase                              | 0.500            |
| 3  | resolution of sister chromatid cohesion           | 0.500            |
| 18 | separation of sister chromatids                   | 0.375            |
| 22 | cell cycle checkpoints                            | 0.375            |
| 21 | mitotic metaphase and anaphase                    | 0.375            |
| 20 | mitotic g1-g1/s phases                            | 0.375            |
| 19 | mitotic anaphase                                  | 0.375            |
| 15 | regulation of apc/c activators between g1/s an... | 0.375            |
| 16 | g1/s transition                                   | 0.375            |

```
[25]: # We can visualize this with the dist_matrix function
df.dist_matrix(figsize=(9,9));
```

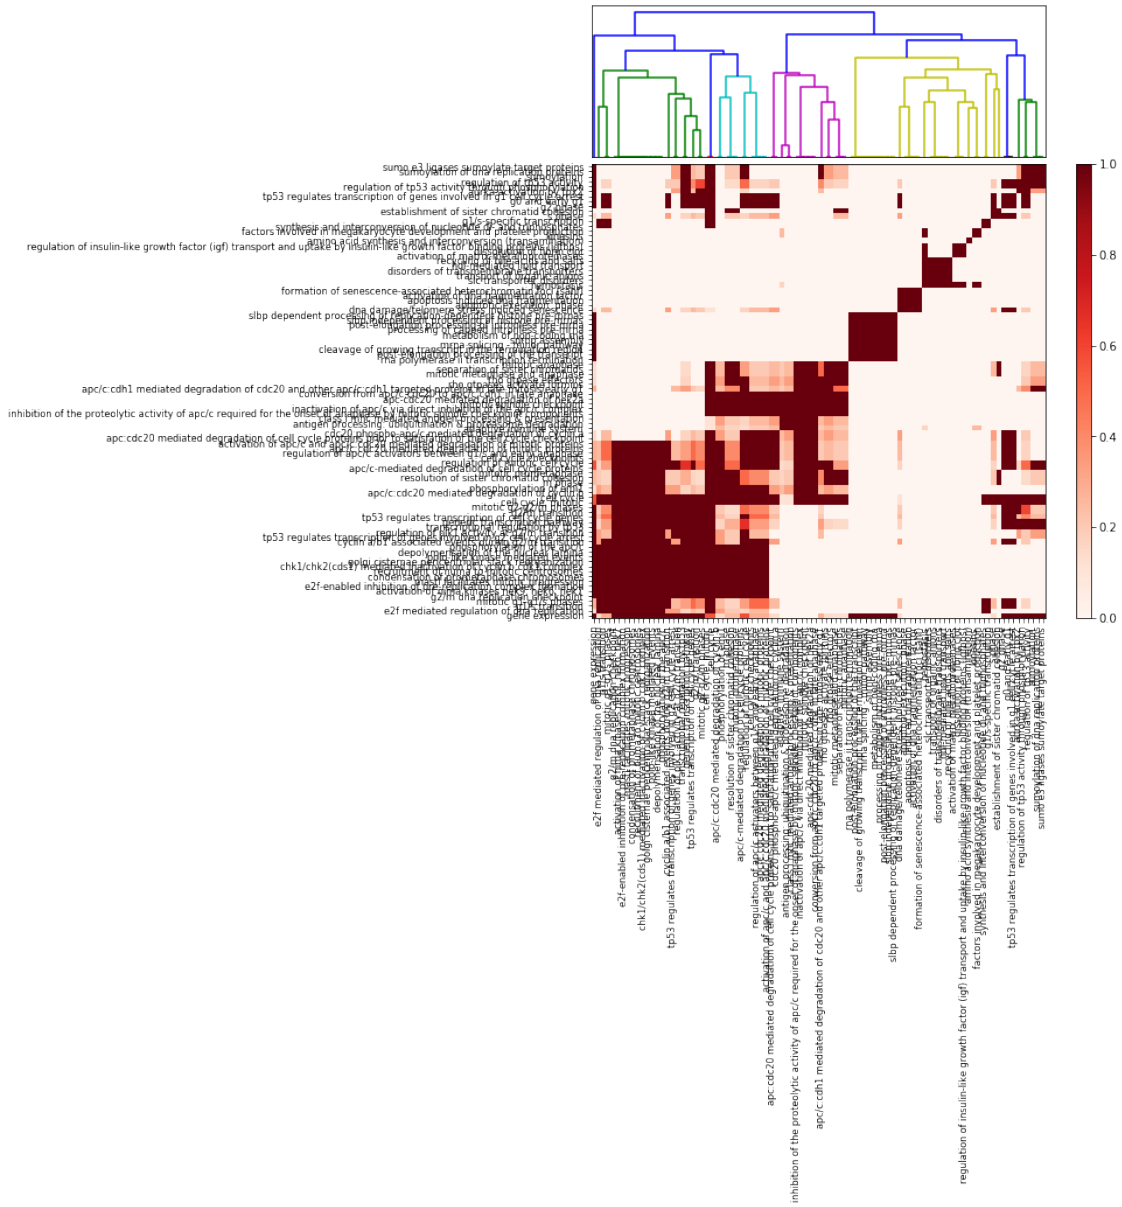

```
[26]: # we can apply it to remove the lesser enriched terms with the remove_redundant_
      ↪ function
df_slim = df.remove_redundant(level='dataframe')
```

Number of rows went from 92 to 8

```
[27]: df_slim.heatmap(
      min_sig=1,
      linewidths=0.01,
      convert_to_log=False,
      figsize=(3, 3)
    );
```

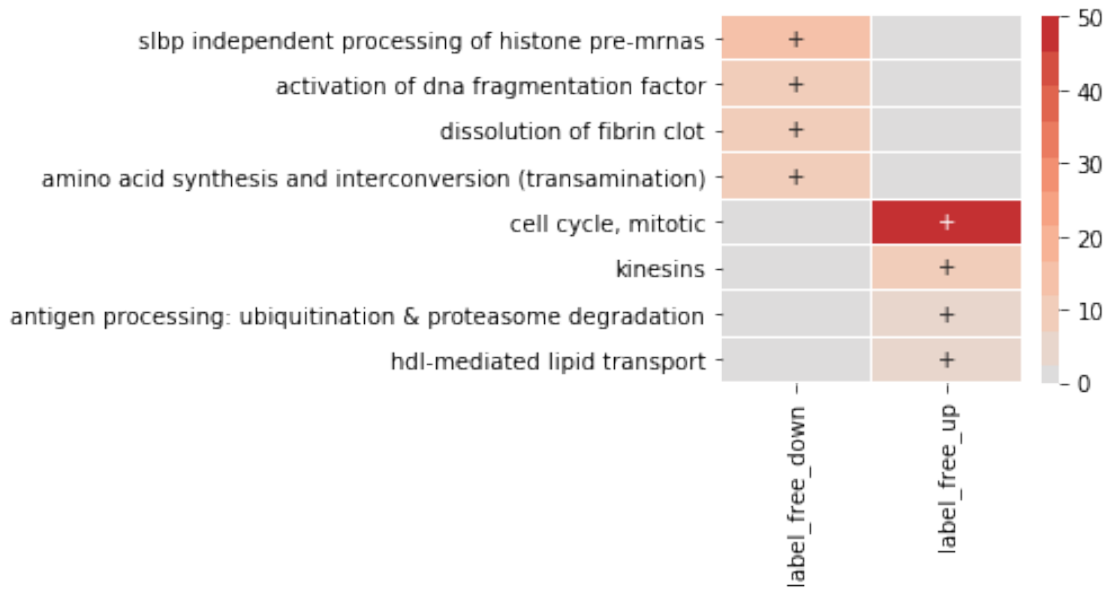

```
[28]: df_slim.dist_matrix(figsize=(9,9));
```

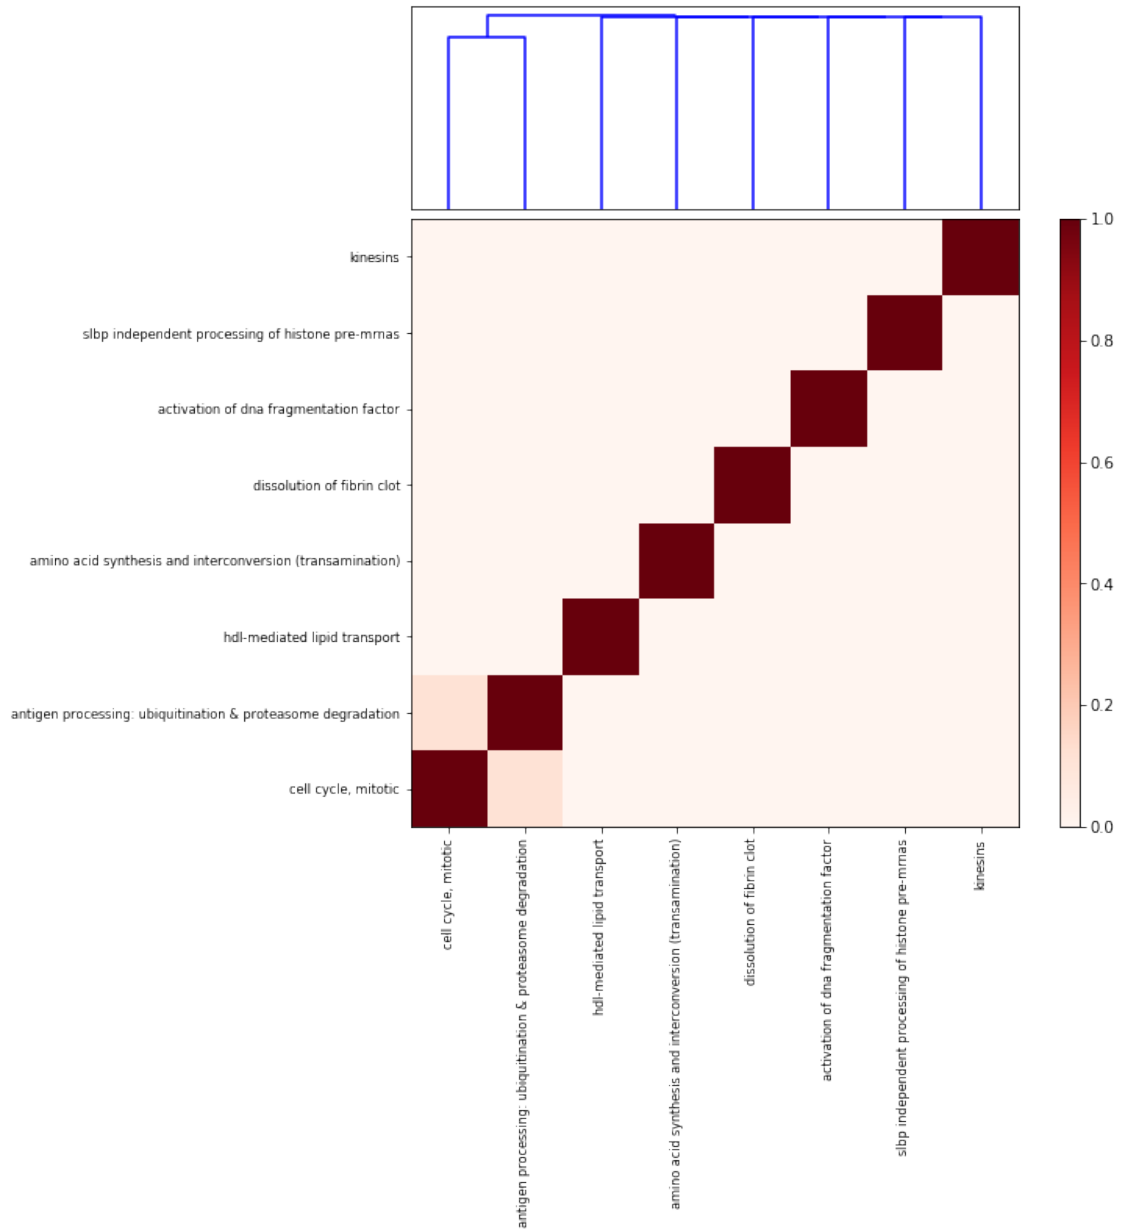

We can still recover the terms removed based on the highest level term kept.

```
[29]: df.show_terms_below('cell cycle, mitotic').heatmap(
        linewidths=0.01,
        convert_to_log=False,
        figsize=(3, 8));
```

Number of rows went from 92 to 8

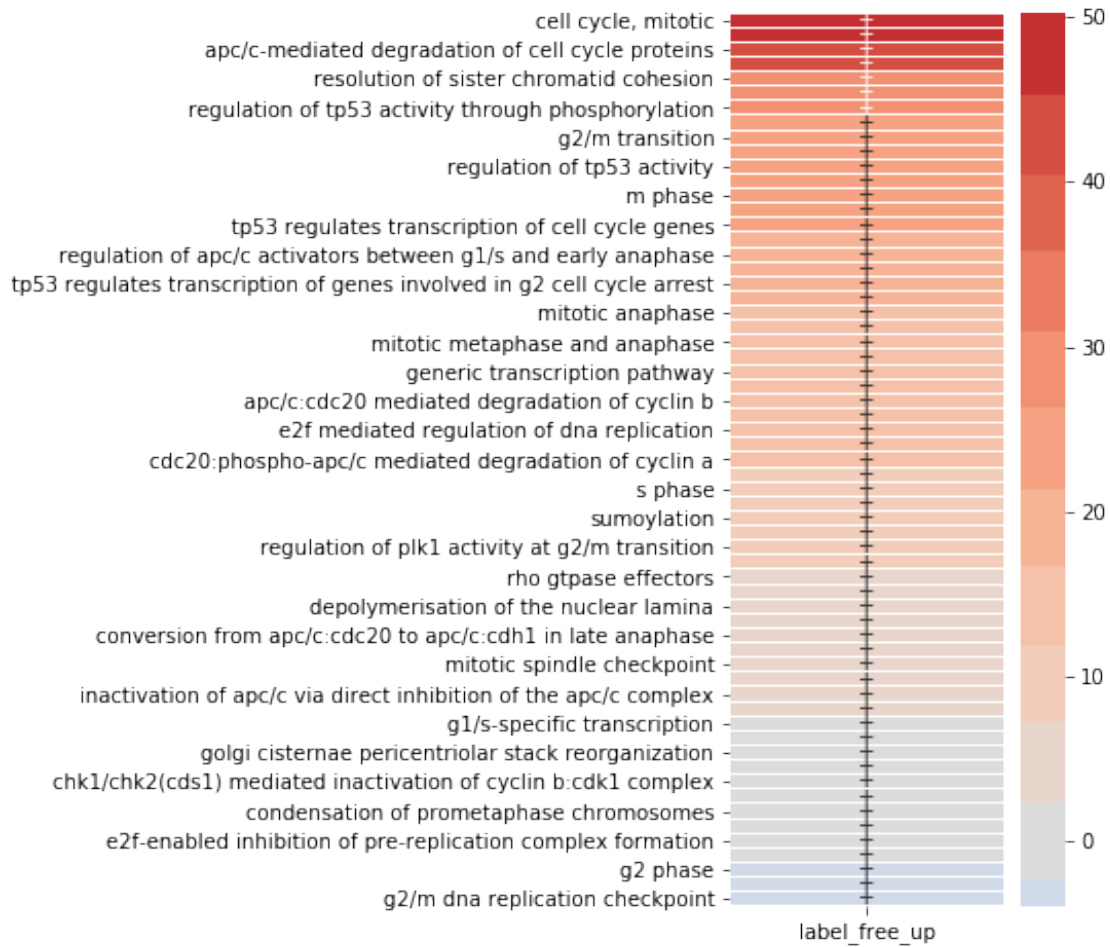

```
[30]: df.show_terms_below('kinesins').heatmap(
        linewidths=0.01,
        convert_to_log=False,
        figsize=(3, 3));
```

Number of rows went from 92 to 8

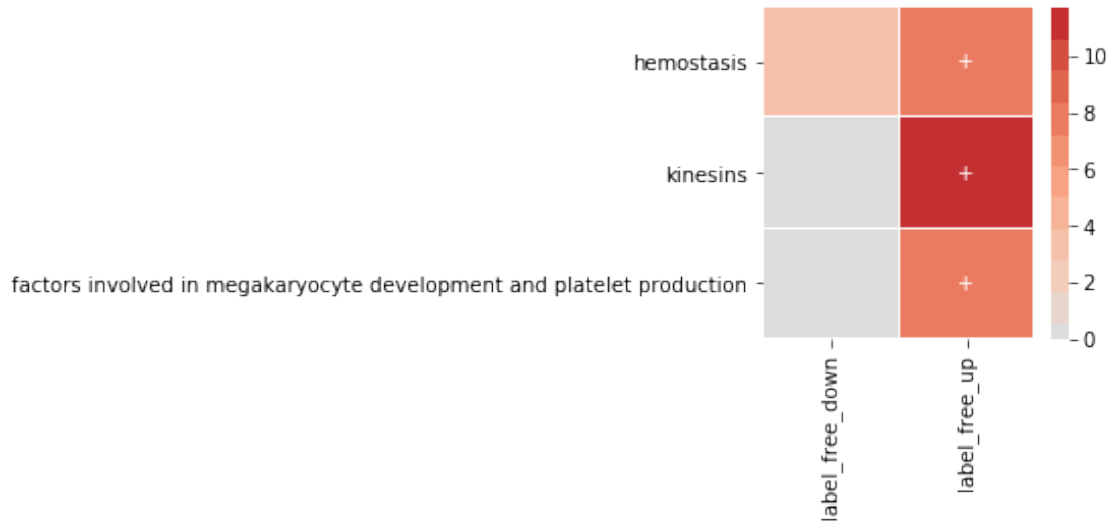

We can use these enriched terms and create a heatmap of those terms.

```
[ ]: exp_data.label_free.heatmap(
    df_slim.term_to_genes('cell cycle, mitotic'),
    subset_index='identifier',
    index='label',
    linewidths=0.01,
    cluster_row=True,
    min_sig=4,
    figsize=(4, 8)
);

[32]: from magine.utils
genes_in_labels = utils.create_dict_from_node_attributes(mol_net, 'termName')
heatmap_by_terms(
    exp_data.rna,
    convert_to_log=True,
    index='label',
    term_labels=list(genes_in_labels.keys()),
    term_sets=list(genes_in_labels.values()),
    div_colors=True,
    linewidths=0.01,
    min_sig=1,
    annotate_sig=True,
    cluster_col=False,
    cluster_row=False,
    y_tick_labels=True,
    figsize=(8, 8)
);
```

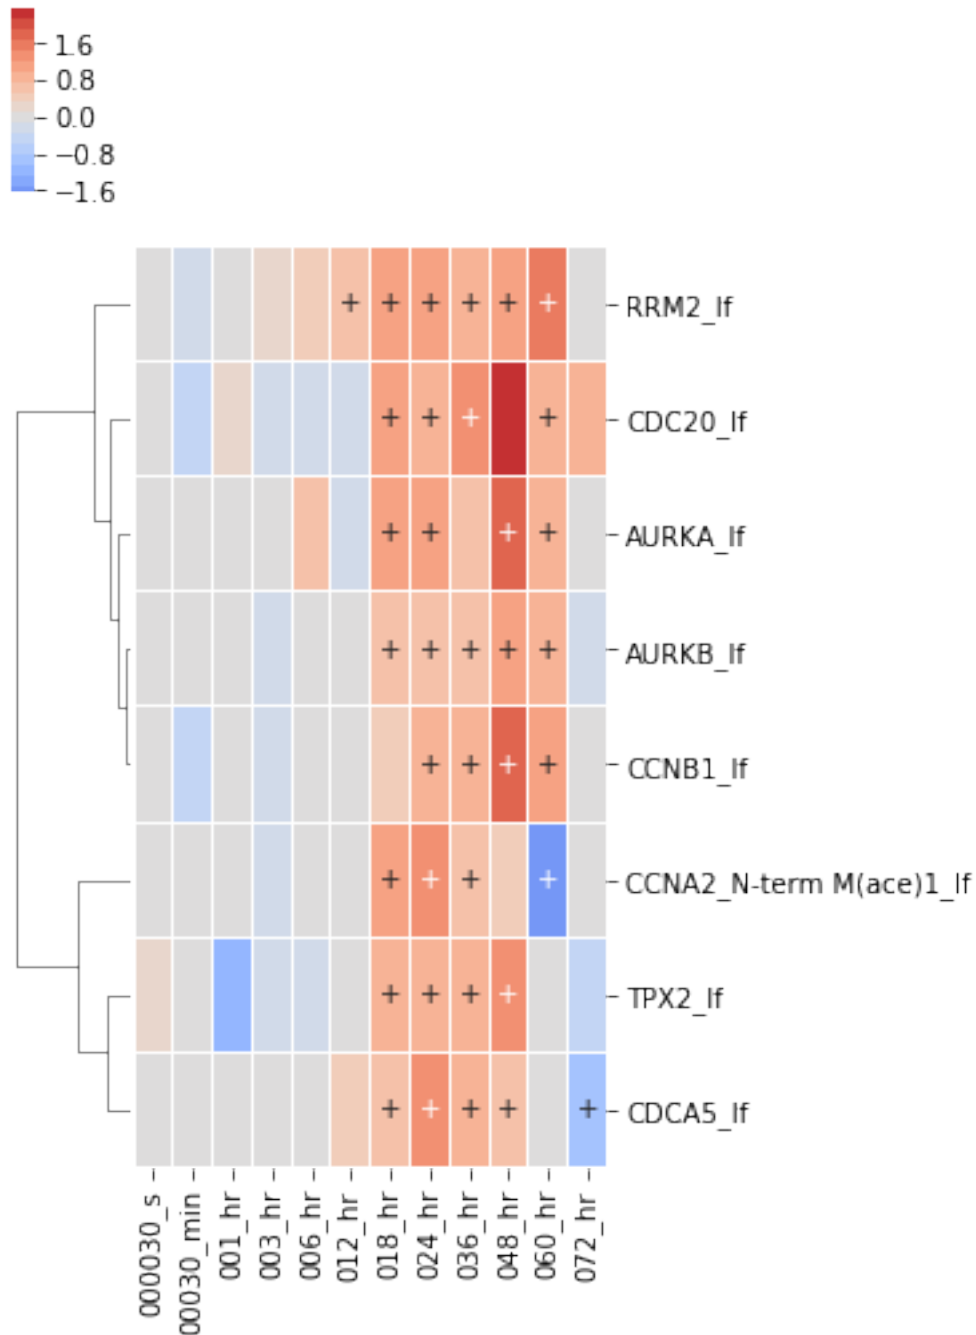

## 0.1 Enrichment analysis

We can use the `ExperimentalData` class to filter the data to create lists of genes for further analysis. We take these lists and run enrichment analysis using `Enrichr`. Since this part is time consuming, it is best to do it outside of a notebook. The code to do so can be found in `run_enrichment.py`. The results will be a csv file that we will load next.



```

[ ]: enrichment_array = load_enrichment_csv('Data/bendamustine_enrichment.csv.gz',
      ↪index_col=0)

[ ]: drug_dbs = [
      'DrugMatrix',
      'Drug_Perturbations_from_GEO_2014',
      # 'LINCS_L1000_Chem_Pert_down',
      # 'LINCS_L1000_Chem_Pert_up'
    ]
drug = enrichment_array.filter_multi(
    p_value=0.05,
    # combined_score=0.0,
    db=drug_dbs,
    # rank=100,
    category=['ph_silac_down', 'ph_silac_up'],
)
drug.sort_values('rank', inplace=True, ascending=True)
# drug.term_name = drug.term_name.str.split('_').str.get(0)
drug.head(10)
drug = clean_drug_dbs(drug)

[ ]: word_cloud = create_wordcloud(drug)
word_cloud.plot();

```

# Data S4. Annotated gene set network construction and exploration. Related to STAR METHODS

December 6, 2019

## 1 Exploring enrichment analysis of HL60 response to bendamustine.

This is the second notebook for the Pino Et. Al. In this notebook we demonstrate how MAGINE can be used to explore the enrichment analysis.

```
[1]: from IPython.display import display, Image
      %matplotlib inline
      import networkx as nx
      import matplotlib.pyplot as plt
      import pandas as pd
      pd.set_option('display.precision', 2)
      pd.set_option('display.max_colwidth', 50)
      %load_ext autoreload
      %autoreload 2

[2]: # load magine specific tools
      from magine.plotting.wordcloud_tools import create_wordcloud
      from magine.plotting.heatmaps import heatmap_by_terms
      from magine.plotting.venn_diagram_maker import create_venn3, create_venn2

      from magine.enrichment import load_enrichment_csv
      from magine.networks import visualization as vis
      from magine.networks import utils, exporters

      from magine.networks.annotated_set import create_subnetwork
      from magine.networks.subgraphs import Subgraph
```

## 2 Exploring enrichment output

### 2.1 Loading data and networks

```
[3]: from exp_data import exp_data
```

**Load enrichment array.** This `bendamustine_enrichment.csv.gz` was created by `run_enrichment.py` script. If it doesn't exist, run that file to generate the results. Due to the number of samples, we run this outside a Jupyter notebook as it can take quite a bit of time.

```
[4]: enrichment_array = load_enrichment_csv('Data/bendamustine_enrichment.csv.gz',
      ↪index_col=0)

enrichment_array['significant'] = False
enrichment_array.loc[(enrichment_array['adj_p_value'] <= 0.05) &
      (enrichment_array['combined_score'] > 0.0),
      'significant'] = True
# Remove terms that are not significant in at least one time point/sample/
↪category
enrichment_array.require_n_sig(
    columns='sample_id',
    index='term_name',
    n_sig=1,
    inplace=True
)
```

```
[5]: enrichment_array[['term_name', 'db', 'category']].nunique()
```

```
[5]: term_name    20758
db              52
category        15
dtype: int64
```

```
[6]: display(enrichment_array.head(5))
```

|   | term_name          | rank | combined_score | adj_p_value | \ |
|---|--------------------|------|----------------|-------------|---|
| 0 | vinblastine-up     | 1    | 34.53          | 2.83e-05    |   |
| 1 | mitotane-up        | 2    | 31.90          | 3.64e-05    |   |
| 2 | dideoxycytidine-dn | 3    | 30.15          | 1.38e-04    |   |
| 3 | busulfan-dn        | 4    | 29.18          | 1.01e-04    |   |
| 4 | mitotane-up        | 5    | 28.76          | 1.39e-04    |   |

  

|   | genes                                                     | n_genes | sample_id | \ |
|---|-----------------------------------------------------------|---------|-----------|---|
| 0 | ADSS, APOA1, APOE, BSG, BTF3, CANX, COPA, DNAJC9, EI24... | 24      | 000030_s  |   |
| 1 | ABI1, ACLY, ALDH3A2, BTF3, CD97, COL4A3BP, COPA, GIT2...  | 23      | 000030_s  |   |
| 2 | ACADVL, ACLY, ALDH3A2, APOA1, APOA2, APOE, BSG, CANX, ... | 23      | 000030_s  |   |
| 3 | ABI1, BTF3, CANX, COPA, DNAJC9, FBXW5, FLNA, HMHA1, HP... | 22      | 000030_s  |   |
| 4 | ACLY, ADSS, AKAP8L, BTF3, CANX, CD97, COL4A3BP, COPA, ... | 21      | 000030_s  |   |

  

|   | category        | db         | significant |
|---|-----------------|------------|-------------|
| 0 | proteomics_both | DrugMatrix | True        |
| 1 | proteomics_both | DrugMatrix | True        |
| 2 | proteomics_both | DrugMatrix | True        |
| 3 | proteomics_both | DrugMatrix | True        |
| 4 | proteomics_both | DrugMatrix | True        |

```
[7]: # clean up printing by selecting fewer columns
cols = ['term_name', 'rank', 'combined_score', 'adj_p_value',
```

```
'n_genes', 'sample_id', 'category']
```

```
[8]: display(enrichment_array[cols].head(5))
```

```
      term_name  rank  combined_score  adj_p_value  n_genes  sample_id  \
0  vinblastine-up    1         34.53    2.83e-05      24  000030_s
1    mitotane-up    2         31.90    3.64e-05      23  000030_s
2  dideoxycytidine-dn  3         30.15    1.38e-04      23  000030_s
3    busulfan-dn    4         29.18    1.01e-04      22  000030_s
4    mitotane-up    5         28.76    1.39e-04      21  000030_s

      category
0  proteomics_both
1  proteomics_both
2  proteomics_both
3  proteomics_both
4  proteomics_both
```

**Load network** Load in the network and initialize Subgraph. We will use this later to construct networks from queries.

```
[9]: network = nx.read_gpickle('Networks/bendamustine_network_w_attributes.p')
net_sub = Subgraph(network)
```

### 3 Single database exploration

Here we will focus on the Reactome enrichment.

```
[10]: reactome_only = enrichment_array.filter_multi(
      db='Reactome_2016', # Only reactome db
    )
# This just cleans up the term name
display(reactome_only['term_name'].head(5))
reactome_only['term_name'] = reactome_only['term_name'].str.split('_').str.
  →get(0)
display(reactome_only['term_name'].head(5))
```

```
80551  processing of capped intron-containing pre-mrn...
80552                gene expression_hsa_r-hsa-74160
80553                mrna splicing_hsa_r-hsa-72172
80554  mrna splicing - major pathway_hsa_r-hsa-72163
80555  transport of mature transcript to cytoplasm_hs...
Name: term_name, dtype: object
```

```
80551  processing of capped intron-containing pre-mrna
80552                gene expression
```

```

80553                               mrna splicing
80554                               mrna splicing - major pathway
80555                               transport of mature transcript to cytoplasm
Name: term_name, dtype: object

```

```

[11]: # we can use a word cloud to view what terms are enriched
word_cloud = create_wordcloud(reactome_only.sig)
word_cloud.plot();

```

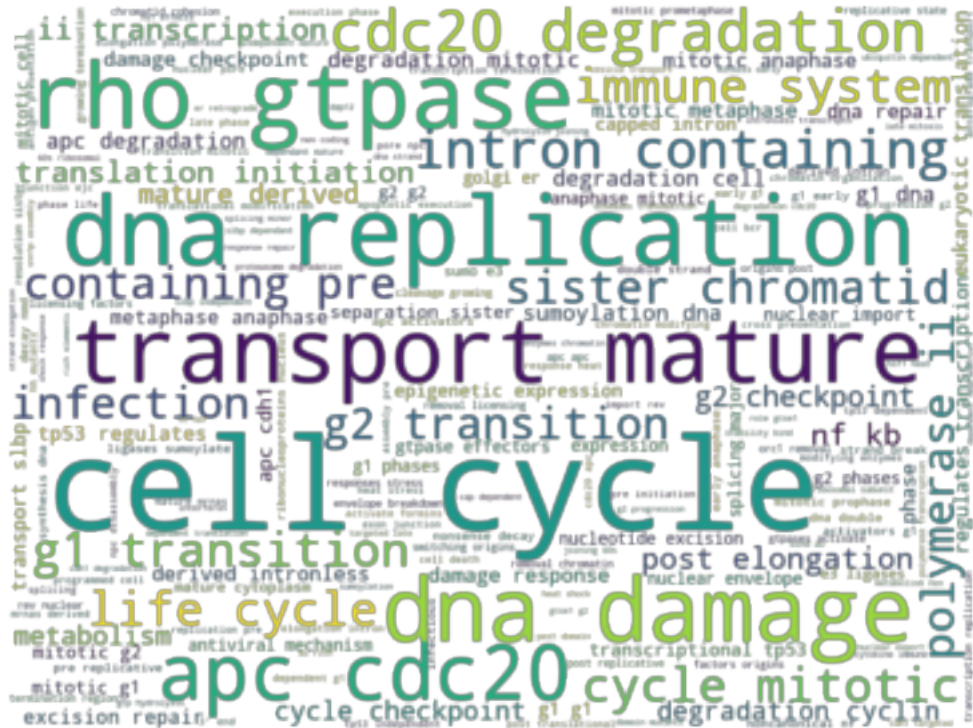

```

[12]: word_cloud.data.head(20)

```

```

[12]:

```

|     | words              | counts |
|-----|--------------------|--------|
| 181 | cell cycle         | 325    |
| 208 | dna replication    | 160    |
| 249 | rho gtpase         | 142    |
| 243 | dna damage         | 139    |
| 179 | transport mature   | 138    |
| 586 | apc cdc20          | 132    |
| 587 | cdc20 degradation  | 122    |
| 175 | introns containing | 121    |
| 353 | immune system      | 98     |
| 199 | life cycle         | 97     |
| 228 | cycle mitotic      | 95     |

|     |                        |    |
|-----|------------------------|----|
| 381 | g1 transition          | 94 |
| 355 | sister chromatid       | 86 |
| 176 | containing pre         | 80 |
| 236 | polymerase ii          | 79 |
| 400 | g2 transition          | 79 |
| 5   | infection              | 77 |
| 429 | translation initiation | 77 |
| 237 | ii transcription       | 75 |
| 261 | post elongation        | 73 |

[ ]:

### 3.1 Phospho-SILAC enrichment

#### 3.1.1 Filtering enrichment output

```
[13]: # subset the data to only look at ph-silac data.
# Later on we will look at label-free, then both.

ph_silac = reactome_only.filter_multi(
    category=['ph_silac_up', 'ph_silac_down'],
)

# arbitrary value that can be easily changed.
ph_silac.require_n_sig(n_sig=4, inplace=True)

not_useful = [
    'gene expression', 'translation',
    'immune system',
    'disease', 'diseases of signal transduction',
    'infectious disease',
    'influenza infection', 'influenza life cycle',
    'influenza viral rna transcription and replication',
]
# ph_silac = ph_silac.loc[~ph_silac['term_name'].isin(not_useful)]
ph_silac_copy = ph_silac.copy()

ph_silac.remove_redundant(
    threshold=.5,
    level='dataframe',
    sort_by='combined_score',
    inplace=True
)
ph_silac.remove_redundant(
    threshold=.5,
    level='sample',
    sort_by='combined_score',
```

```
inplace=True
)
```

Number of rows went from 110 to 19  
Number of rows went from 19 to 19

```
[14]: ph_silac.dist_matrix();
```

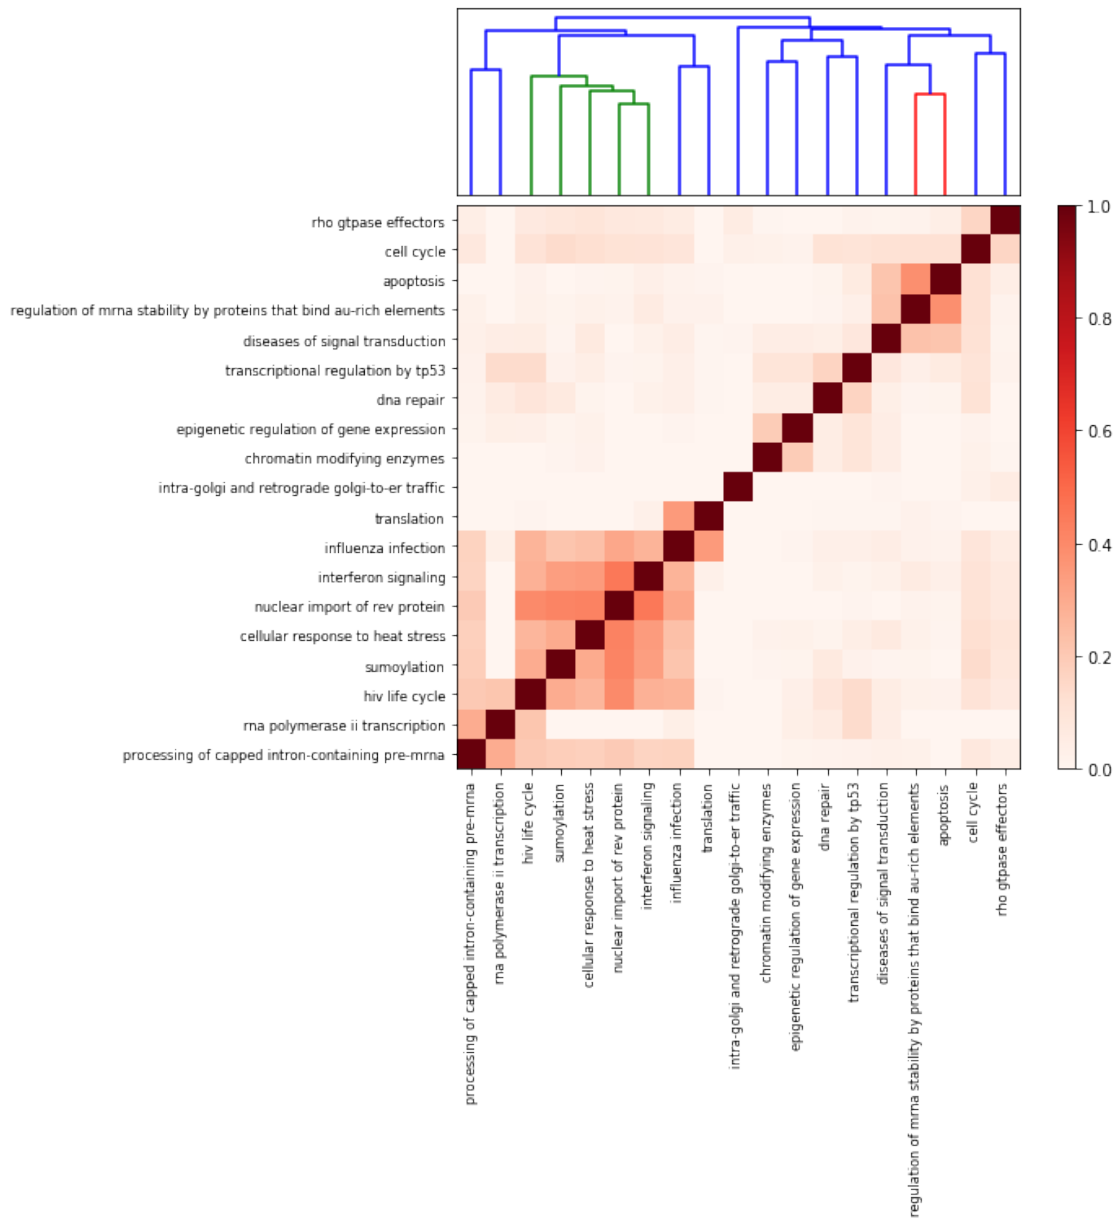

```
[16]: ph_silac.heatmap(
        convert_to_log=False,
```

```

cluster_by_set=False,
cluster_row=False,
values='combined_score',
columns=['category', 'sample_id'],
annotate_sig=True,
div_colors=True,
linewidths=.005,
figsize=(5,12)
);
plt.savefig("ph_silac_enriched.png", dpi=300, bbox_inches='tight')

```

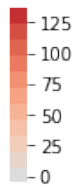

■ ph\_silac\_down  
■ ph\_silac\_up

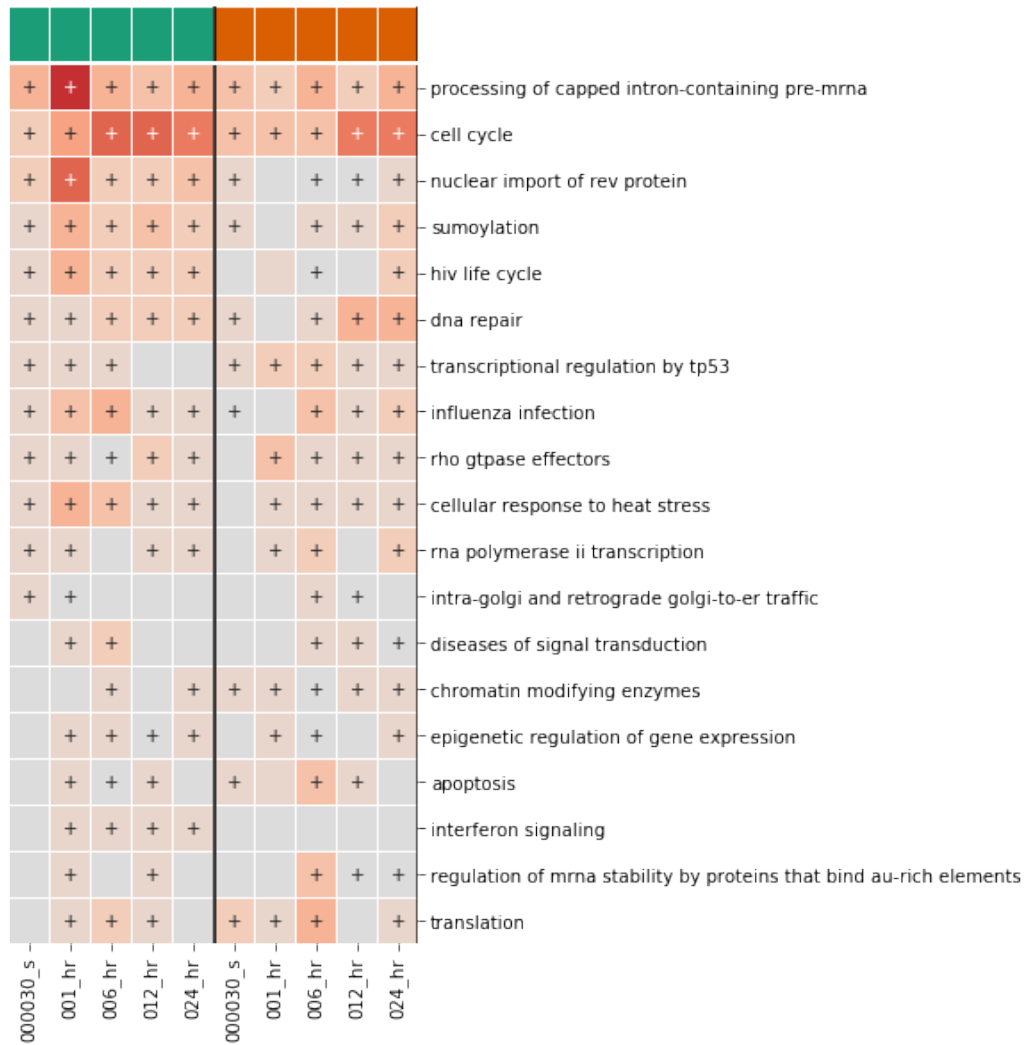



```
[17]: # This figure shows the process of discovering "too general/not useful term".
# Translation involves various genes that make up individual process
ph_silac_copy.show_terms_below("translation").heatmap(
    convert_to_log=False,
    cluster_by_set=False,
    cluster_row=False,
    values='combined_score',
    columns=['category', 'sample_id'],
    annotate_sig=True,
    div_colors=True,
    linewidths=.005,
    figsize=(5, 12)
);
```

Number of rows went from 110 to 23

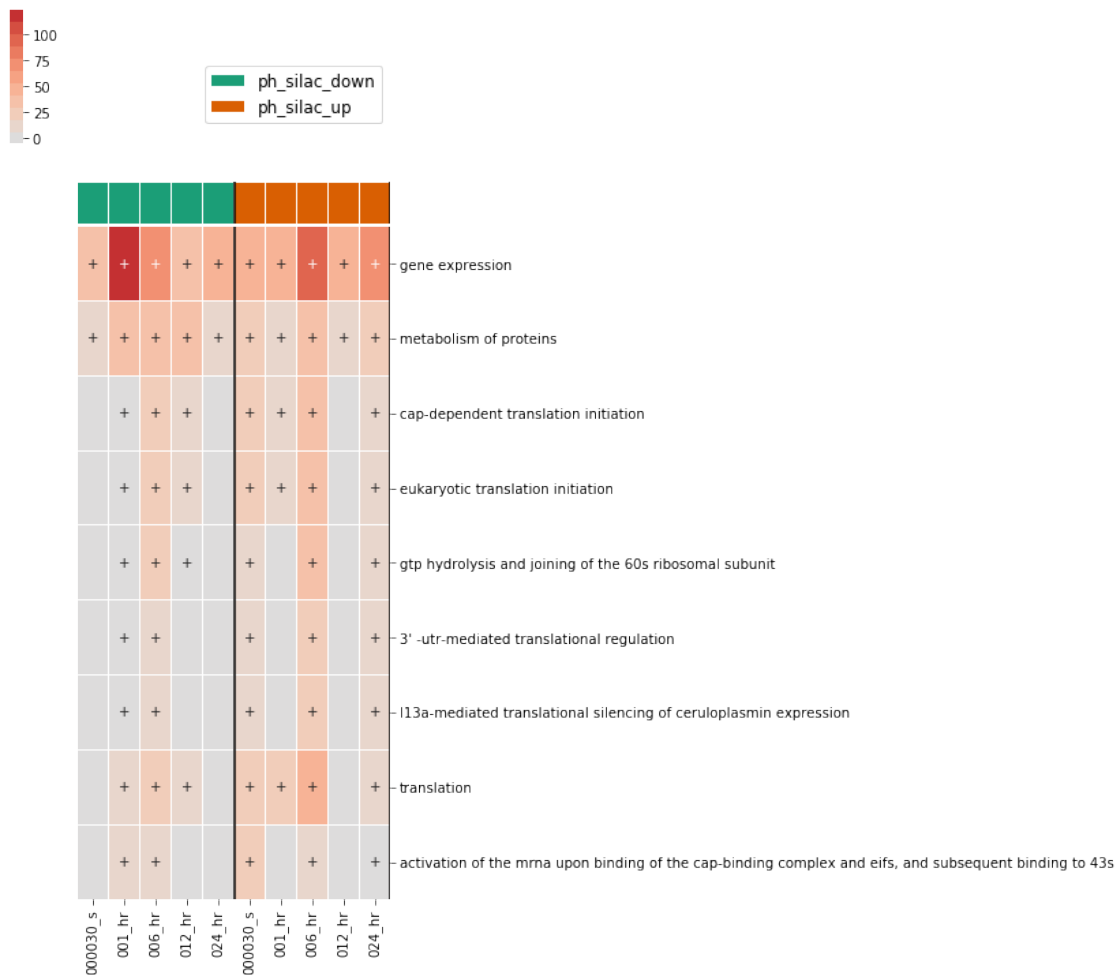

```
[18]: # We can use the same thought process to find more specific terms
ph_silac_copy.show_terms_below("cell cycle", remove_subset=False, threshold=.5).
→require_n_sig(n_sig=1).heatmap(
    convert_to_log=False,
    cluster_by_set=False,
    cluster_row=False,
    values='combined_score',
    columns=['category', 'sample_id'],
    annotate_sig=True,
    div_colors=True,
    linewidths=.005,
    figsize=(5, 12)
);
plt.savefig("below_cell_cycle.png", bbox_inches='tight', dpi=300)
```

Number of rows went from 110 to 19

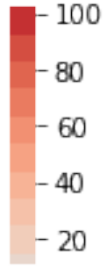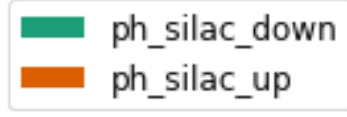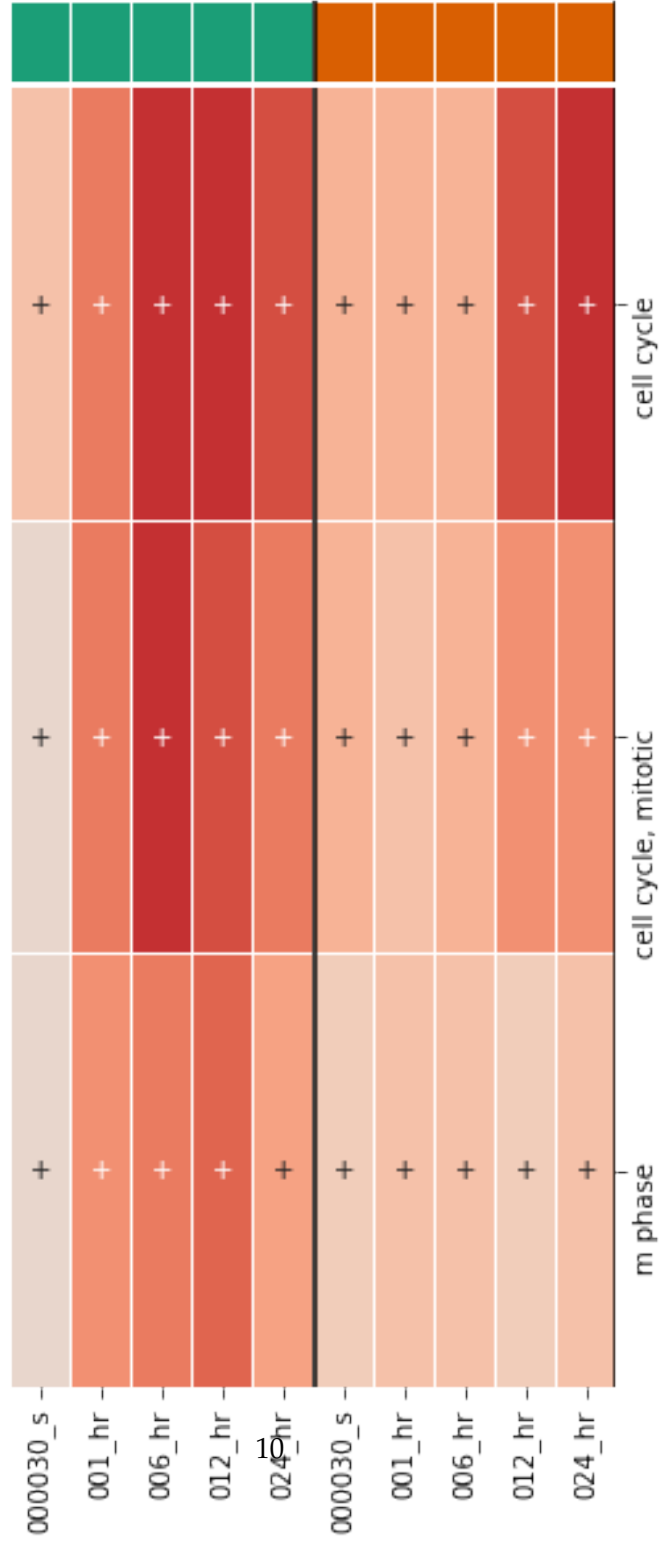

### 3.1.2 Creating an annotated set network.

```
[19]: import matplotlib.pyplot as plt
import numpy as np
from scipy import ndimage
from scipy import misc
import matplotlib.image as mpimg
import imageio

def trip_photo(im_location, title=None):
    """
    Removes whitespace and adds title to image

    Parameters
    -----
    im_location: str
        location of file, will be used for output as well
    title : str
        title to provide to add to image
        Will be the sample id

    Returns
    -----

    """
    img = mpimg.imread(im_location)
    # mask = img[:, :, 0] < 1

    # img = img[np.ix_(mask.any(1), mask.any(0))]

    plt.imshow(img, interpolation='none')
    plt.xticks([])
    plt.yticks([])
    if title is not None:
        plt.title(title, fontsize=18)
    plt.axis('off')
    out = im_location.replace('.png', '_formatted.png')
    out2 = im_location.replace('.png', '_formatted.svg')
    plt.savefig(out, dpi=1000, bbox_inches='tight', transparent=True)
    plt.savefig(out2, bbox_inches='tight', transparent=True)
    plt.close()
```

```

def create_gif(prefix, timepoints, save_name):
    f_names = ["{}_{}.png".format(prefix, i) for i in tps]
    for i,j in zip(f_names, tps):
        trip_photo(i, j)

    kargs = {'duration': 8 / len(f_names)}

    imageio.mimsave(
        '{}.gif'.format(save_name),
        [imageio.imread(i.replace('.png', '_formatted.png')) for i in f_names],
        **kargs
    )
    return Image('{}.gif'.format(save_name),)

```

```

[20]: prefix = 'ph_silac_ags'
      tps = ['000030s', '001hr', '006hr', '012hr', '024hr']
      term_net, mol_net = create_subnetwork(
          ph_silac,
          network=network,
          save_name='ph_silac_ags',
          use_cytoscape=True,
          use_fdr=True, use_threshold=True, min_edges=20,
          scale=150
      )
      create_gif(prefix, tps, 'scale_150')

```

Creating ontology network

```

↳ -----
↳
↳ ConnectionRefusedError                                Traceback (most recent call↳
↳ last)
↳
↳ ~\miniconda3\envs\magine_37\lib\site-packages\urllib3\connection.py in↳
↳ _new_conn(self)
↳     158             conn = connection.create_connection(
↳ --> 159                 (self._dns_host, self.port), self.timeout,↳
↳ **extra_kw)
↳     160
↳
↳ ~\miniconda3\envs\magine_37\lib\site-packages\urllib3\util\connection.py↳
↳ in create_connection(address, timeout, source_address, socket_options)
↳     79         if err is not None:
↳ ---> 80             raise err
↳     81

```

```

~\miniconda3\envs\magine_37\lib\site-packages\urllib3\util\connection.py
↳ in create_connection(address, timeout, source_address, socket_options)
    69             sock.bind(source_address)
---> 70             sock.connect(sa)
    71             return sock

```

ConnectionRefusedError: [WinError 10061] No connection could be made  
↳ because the target machine actively refused it

During handling of the above exception, another exception occurred:

```

NewConnectionError                                Traceback (most recent call
↳ last)

```

```

~\miniconda3\envs\magine_37\lib\site-packages\urllib3\connectionpool.py
↳ in urlopen(self, method, url, body, headers, retries, redirect,
↳ assert_same_host, timeout, pool_timeout, release_conn, chunked, body_pos,
↳ **response_kw)
    599                                     body=body,
↳ headers=headers,
--> 600                                     chunked=chunked)
    601

```

```

~\miniconda3\envs\magine_37\lib\site-packages\urllib3\connectionpool.py
↳ in _make_request(self, conn, method, url, timeout, chunked,
↳ **httplib_request_kw)
    353             else:
--> 354                 conn.request(method, url, **httplib_request_kw)
    355

```

```

~\miniconda3\envs\magine_37\lib\http\client.py in request(self, method,
↳ url, body, headers, encode_chunked)
    1228         """Send a complete request to the server."""
-> 1229         self._send_request(method, url, body, headers,
↳ encode_chunked)
    1230

```

```

~\miniconda3\envs\magine_37\lib\http\client.py in _send_request(self,
↳ method, url, body, headers, encode_chunked)

```

```

1274             body = _encode(body, 'body')
-> 1275             self.endheaders(body, encode_chunked=encode_chunked)
1276

~\miniconda3\envs\magine_37\lib\http\client.py in endheaders(self,
↳message_body, encode_chunked)
1223             raise CannotSendHeader()
-> 1224             self._send_output(message_body,
↳encode_chunked=encode_chunked)
1225

~\miniconda3\envs\magine_37\lib\http\client.py in _send_output(self,
↳message_body, encode_chunked)
1015             del self._buffer[:]
-> 1016             self.send(msg)
1017

~\miniconda3\envs\magine_37\lib\http\client.py in send(self, data)
955             if self.auto_open:
--> 956                 self.connect()
957             else:

~\miniconda3\envs\magine_37\lib\site-packages\urllib3\connection.py in
↳connect(self)
180         def connect(self):
--> 181             conn = self._new_conn()
182             self._prepare_conn(conn)

~\miniconda3\envs\magine_37\lib\site-packages\urllib3\connection.py in
↳_new_conn(self)
167             raise NewConnectionError(
--> 168                 self, "Failed to establish a new connection: %s" % e)
169

NewConnectionError: <urllib3.connection.HTTPConnection object at
↳0x000001D71B544710>: Failed to establish a new connection: [WinError 10061] No
↳connection could be made because the target machine actively refused it

```

During handling of the above exception, another exception occurred:

```

MaxRetryError                                Traceback (most recent call
↳last)

~\miniconda3\envs\magine_37\lib\site-packages\requests\adapters.py in
↳send(self, request, stream, timeout, verify, cert, proxies)
    448                 retries=self.max_retries,
--> 449                 timeout=timeout
    450             )

~\miniconda3\envs\magine_37\lib\site-packages\urllib3\connectionpool.py
↳in urlopen(self, method, url, body, headers, retries, redirect,
↳assert_same_host, timeout, pool_timeout, release_conn, chunked, body_pos,
↳**response_kw)
    637                 retries = retries.increment(method, url, error=e,
↳_pool=self,
--> 638                 _stacktrace=sys.
↳exc_info()[2])
    639                 retries.sleep()

~\miniconda3\envs\magine_37\lib\site-packages\urllib3\util\retry.py in
↳increment(self, method, url, response, error, _pool, _stacktrace)
    398                 if new_retry.is_exhausted():
--> 399                     raise MaxRetryError(_pool, url, error or
↳ResponseError(cause))
    400

MaxRetryError: HTTPConnectionPool(host='localhost', port=1234): Max
↳retries exceeded with url: /v1/styles/visualproperties (Caused by
↳NewConnectionError('<urllib3.connection.HTTPConnection object at
↳0x000001D71B544710>: Failed to establish a new connection: [WinError 10061] No
↳connection could be made because the target machine actively refused it'))

```

During handling of the above exception, another exception occurred:

```

ConnectionError                                Traceback (most recent call
↳last)

<ipython-input-20-6f0dfd01020f> in <module>
     7     use_cytoscape=True,
     8     use_fdr=True, use_threshold=True, min_edges=20,
----> 9     scale=150

```



```

10 )
11 create_gif(prefix, tps, 'scale_150')

E:\PycharmProjects\PycharmProjects\Magine\magine\networks\annotated_set.
↳py in create_subnetwork(df, network, terms, save_name, draw_png,
↳remove_isolated, use_cytoscape, merge, out_dir, use_threshold, use_fdr,
↳min_edges, scale)
    310     if use_cytoscape:
    311         from magine.networks.visualization.cytoscape import
↳RenderModel
    --> 312         rm = RenderModel(term_g, layout='force-directed')
    313         rm.visualize_by_list_of_time(labels,
    314                                     prefix=save_name,

E:
↳\PycharmProjects\PycharmProjects\Magine\magine\networks\visualization\cytoscape.
↳py in __init__(self, graph, layout, style)
    76
    77     self.graph = graph
    ---> 78     self.cy = CyRestClient()
    79     self.cy.session.delete()
    80     self.cy.layout2 = LayoutClient()

E:
↳\PycharmProjects\PycharmProjects\py2cytoscape\py2cytoscape\data\cyrest_client.
↳py in __init__(self, ip, port, version)
    17
    18     self.network = NetworkClient(self.__url)
    ---> 19     self.style = StyleClient(self.__url)
    20     self.layout = LayoutClient(self.__url)
    21     self.edgebundling = EdgeBundlingClient(self.__url)

E:
↳\PycharmProjects\PycharmProjects\py2cytoscape\py2cytoscape\data\style_client.
↳py in __init__(self, url)
    14     self.__url_apply = url + 'apply/styles/'
    15
    ---> 16     self.vps = VisualProperties(url)
    17
    18     def create(self, name=None, original_style=None):

```

```

E:
↳\PycharmProjects\PycharmProjects\py2cytoscape\py2cytoscape\data\style_client.
↳py in __init__(self, url)
    75     def __init__(self, url):
    76         self.__url = url + 'styles/visualproperties'
---> 77         self.__convert_to_dict()
    78
    79     def __convert_to_dict(self):

```

```

E:
↳\PycharmProjects\PycharmProjects\py2cytoscape\py2cytoscape\data\style_client.
↳py in __convert_to_dict(self)
    78
    79     def __convert_to_dict(self):
---> 80         vps = requests.get(self.__url).json()
    81         vp_dict = {}
    82         node_vps = []

```

```

~\miniconda3\envs\magine_37\lib\site-packages\requests\api.py in
↳get(url, params, **kwargs)
    73
    74     kwargs.setdefault('allow_redirects', True)
---> 75     return request('get', url, params=params, **kwargs)
    76
    77

```

```

~\miniconda3\envs\magine_37\lib\site-packages\requests\api.py in
↳request(method, url, **kwargs)
    58     # cases, and look like a memory leak in others.
    59     with sessions.Session() as session:
---> 60         return session.request(method=method, url=url, **kwargs)
    61
    62

```

```

~\miniconda3\envs\magine_37\lib\site-packages\requests\sessions.py in
↳request(self, method, url, params, data, headers, cookies, files, auth,
↳timeout, allow_redirects, proxies, hooks, stream, verify, cert, json)
    531     }
    532     send_kwargs.update(settings)
--> 533     resp = self.send(prepare_request(method, url, **kwargs))
    534
    535     return resp

```

```

~\miniconda3\envs\magine_37\lib\site-packages\requests\sessions.py in
↳ send(self, request, **kwargs)
    644
    645         # Send the request
--> 646         r = adapter.send(request, **kwargs)
    647
    648         # Total elapsed time of the request (approximately)

```

```

~\miniconda3\envs\magine_37\lib\site-packages\requests\adapters.py in
↳ send(self, request, stream, timeout, verify, cert, proxies)
    514             raise SSLError(e, request=request)
    515
--> 516             raise ConnectionError(e, request=request)
    517
    518         except ClosedPoolError as e:

```

```

ConnectionError: HTTPConnectionPool(host='localhost', port=1234): Max
↳ retries exceeded with url: /v1/styles/visualproperties (Caused by
↳ NewConnectionError('<urllib3.connection.HTTPConnection object at
↳ 0x000001D71B544710>: Failed to establish a new connection: [WinError 10061] No
↳ connection could be made because the target machine actively refused it'))

```

```

[26]: term_net, mol_net = create_subnetwork(
    ph_silac,
    network=network,
    save_name='ph_silac_ags',
    use_cytoscape=False,
    use_fdr=True, use_threshold=True, min_edges=20,
    scale=200
)
create_gif(prefix, tps, 'scale_200')

```

Creating ontology network

[26]: <IPython.core.display.Image object>

```

[]: term_net, mol_net = create_subnetwork(
    ph_silac,
    network=network,
    save_name='ph_silac_ags',
    use_cytoscape=True,
    use_fdr=True, use_threshold=True, min_edges=20,
    scale=300
)

```

```
create_gif(prefix, tps, 'scale_300')
```

```
[27]: vis.draw_cyjs(term_net, default_color='white', layout='concentric',  
→spacingFactor=2.8)
```

<IPython.core.display.HTML object>

### 3.1.3 Known mechanisms of bendamustine

Next, we will demonstrate how to explore known mechanisms. Bendamustine is known to cause dna damage, cell cycle arrest, and apoptosis, so we will start there.

```
[ ]: selected_terms = ['dna repair', 'cell cycle', 'apoptosis']  
  
# extract out lists of genes for each term  
g_sets = [ph_silac.sig.term_to_genes(i) for i in selected_terms]  
  
# visualize the overlap  
create_venn3(*g_sets+selected_terms, save_name='venn_canonical');
```

```
[ ]: def print_numbers(term_name):  
    genes = reactome_only.sig.term_to_genes(term_name)  
    n_sig = len(genes)  
    if n_sig:  
        n_sig_ptms = len(exp_data.subset(genes).sig.label_list)  
        print("{} : {} : {}".format(term_name, n_sig, n_sig_ptms))  
print_numbers('cell cycle')  
print_numbers('dna repair')  
print_numbers('apoptosis')
```

```
[ ]: # though we focused on ph-silac originally, we can see if the terms of interest  
→are in other datasets  
subset = reactome_only.loc[reactome_only.term_name.isin(selected_terms)].copy()  
  
subset.filter_multi(  
    category=['ph_silac_down', 'ph_silac_up',  
             'label_free_down', 'label_free_up',  
             'silac_up', 'silac_down',  
             'rna_up', 'rna_down'],  
    inplace=True,  
)  
  
# remove time points and samples that don't contain a significant term  
subset.require_n_sig(  
    n_sig=1,  
    index=['category', 'sample_id'],  
    columns='term_name',  
    inplace=True
```

```

)
subset.require_n_sig(
    n_sig=1,
    index=['sample_id', 'category'],
    columns='term_name',
    inplace=True
)

fig = subset.heatmap(
    convert_to_log=False,
    cluster_by_set=False,
    annotate_sig=True,
    columns=['category', 'sample_id'],
    div_colors=True,
    linewidths=.005,
    figsize=(12, 16)
);

```

```

[:]: # subset the data to only include these terms
subset = reactome_only.sig.loc[reactome_only.sig.term_name.
    →isin(selected_terms)].copy()

```

```

term_net, mol_net = create_subnetwork(
    subset,
    network=network,
    save_name='apop_dna_cell_cycle',
    use_cytoscape=False,
    use_fdr=True,
    use_threshold=True,
    min_edges=10
)
print(len(mol_net.nodes))
print(len(mol_net.edges))

```

```

[:]: nx.set_node_attributes(term_net, 'white', 'color')
vis.draw_cyjs(term_net, layout='concentric', spacingFactor=2.8)

```

## DNA damage response

```

[:]: # extract dna repair genes
dna_repair_genes = reactome_only.sig.term_to_genes('dna repair')

exp_data.ph_silac.heatmap(
    dna_repair_genes,
    convert_to_log=True,
    subset_index='identifier',
    index='label',

```

```

cluster_row=True,
rank_index=True,
min_sig=2,
num_colors=13,
linewidths=0.01
);

```

```

exp_data.label_free.heatmap(
    dna_repair_genes,
    convert_to_log=True,
    subset_index='identifier',
    index='label',
    cluster_row=True,
    rank_index=True,
    min_sig=2,
    num_colors=13,
    linewidths=0.01
);

```

```

exp_data.rna_seq.heatmap(
    dna_repair_genes,
    convert_to_log=True,
    subset_index='identifier',
    index='label',
    cluster_row=True,
    rank_index=True,
    min_sig=2,
    num_colors=13,
    linewidths=0.01
);

```

```

[:]: # Look at only first time point
first_tp = exp_data.species.subset(dna_repair_genes, sample_ids=['000030_s']).
    →sig

first_tp.heatmap(figsize=(3,6), index='label', linewidths=0.01);

```

```

[:]: # Create a network based on the first time point, include dna damage nodes
dna_repair_subnet = net_sub.expand_neighbors(
    nodes=first_tp.id_list,
    upstream=False,
    downstream=True,
    add_interconnecting_edges=True,
    max_dist=1,
    include_only=dna_repair_genes
)

```

```

# removes disconnected nodes in network
dna_repair_subnet = utils.delete_disconnected_network(dna_repair_subnet)

colors = dict()
for i in dna_repair_subnet.nodes:
    if i in first_tp.id_list:
        colors[i] = 'lightgreen'
    else:
        colors[i] = 'lightblue'
nx.set_node_attributes(dna_repair_subnet, colors, 'color')

```

```
[]: vis.draw_cyjs(dna_repair_subnet, layout='cose-bilkent', spacingFactor=2.)
```

```
[]: vis.draw_cyjs(dna_repair_subnet, layout='concentric', spacingFactor=1.)
```

## Cell cycle

```
[]: cell_cycle_genes = reactome_only.sig.term_to_genes('cell cycle')
```

```

exp_data.ph_silac.heatmap(
    cell_cycle_genes,
    subset_index='identifier',
    index='label',
    cluster_row=True,
    rank_index=True,
    min_sig=2,
    num_colors=13,
    linewidths=0.01,
    figsize=(6, 20),
    y_tick_labels=True
);

```

```

exp_data.label_free.heatmap(
    cell_cycle_genes,
    subset_index='identifier',
    index='label',
    cluster_row=True,
    rank_index=True,
    min_sig=2,
    num_colors=13,
    linewidths=0.01,
    figsize=(6,16)
);

```

```

exp_data.rna_seq.heatmap(
    cell_cycle_genes,
    subset_index='identifier',

```

```
index='label',
cluster_row=True,
rank_index=True,
min_sig=1,
num_colors=13,
linewidths=0.01,
figsize=(6,10)
);
```

```
[ ]: apoptosis_genes = reactome_only.sig.term_to_genes('apoptosis')
```

```
exp_data.ph_silac.heatmap(
    apoptosis_genes,
    subset_index='identifier',
    index='label',
    cluster_row=False,
    rank_index=True,
    min_sig=1,
    num_colors=13,
    linewidths=0.01,
    figsize=(6,16)
);
```

```
exp_data.label_free.heatmap(
    apoptosis_genes,
    subset_index='identifier',
    index='label',
    cluster_row=False,
    rank_index=True,
    min_sig=1,
    num_colors=13,
    linewidths=0.01,
    figsize=(6,16)
);
```

```
exp_data.rna_seq.heatmap(
    apoptosis_genes,
    subset_index='identifier',
    index='label',
    cluster_row=True,
    rank_index=True,
    min_sig=1,
    num_colors=13,
    linewidths=0.01,
    figsize=(6,10)
);
```



```

[ ]: print("DNA repair")
    for i in exp_data.exp_methods:
        print("\t", i, len(exp_data[i].subset(dna_repair_genes).sig.id_list),
              len(exp_data[i].subset(dna_repair_genes).sig.label_list))
    print("Cell cycle")
    for i in exp_data.exp_methods:
        print("\t", i, len(exp_data[i].subset(cell_cycle_genes).sig.id_list),
              len(exp_data[i].subset(cell_cycle_genes).sig.label_list))
    print("Apoptosis")
    for i in exp_data.exp_methods:
        print("\t", i, len(exp_data[i].subset(apoptosis_genes).sig.id_list),
              len(exp_data[i].subset(apoptosis_genes).sig.label_list))

[ ]: # create plots grouping together data for each platform

genes_in_labels = utils.create_dict_from_node_attributes(mol_net, 'termName')

# phosph-silac
heatmap_by_terms(
    exp_data.ph_silac,
    convert_to_log=True,
    index='label',
    term_labels=list(genes_in_labels.keys()),
    term_sets=list(genes_in_labels.values()),
    div_colors=True,
    linewidths=0.01,
    min_sig=3,
    annotate_sig=True,
    cluster_col=False,
    cluster_row=False,
    y_tick_labels=True,
    figsize=(6, 12)
);

# label free
heatmap_by_terms(
    exp_data.label_free,
    convert_to_log=True,
    index='label',
    term_labels=list(genes_in_labels.keys()),
    term_sets=list(genes_in_labels.values()),
    div_colors=True,
    linewidths=0.01,
    min_sig=3,
    annotate_sig=True,
    cluster_col=False,
    cluster_row=False,

```

```

    y_tick_labels=True,
    figsize=(8, 12)
);

# silac
heatmap_by_terms(
    exp_data.silac,
    convert_to_log=True,
    index='label',
    term_labels=list(genes_in_labels.keys()),
    term_sets=list(genes_in_labels.values()),
    div_colors=True,
    linewidths=0.01,
    min_sig=2,
    annotate_sig=True,
    cluster_col=False,
    cluster_row=False,
    y_tick_labels=True,
    figsize=(4, 4)
);

# rna
heatmap_by_terms(
    exp_data.rna_seq,
    convert_to_log=True,
    index='label',
    term_labels=list(genes_in_labels.keys()),
    term_sets=list(genes_in_labels.values()),
    div_colors=True,
    linewidths=0.01,
    min_sig=1,
    annotate_sig=True,
    cluster_col=False,
    cluster_row=False,
    y_tick_labels=True,
    figsize=(5, 10)
);

```

### 3.1.4 Lets look at only up-regulated ph-silac

```

[22]: ph_silac_up = reactome_only.filter_multi(category=['ph_silac_up'])

not_useful = [
    'gene expression', 'translation',

```

```

    'immune system',
    'disease', 'diseases of signal transduction',
    'infectious disease',
    'influenza infection', 'influenza life cycle',
    'influenza viral rna transcription and replication',
]

ph_silac_up = ph_silac_up.loc[~ph_silac_up['term_name'].isin(not_useful)]

print("Number of terms before filtering base on minimum time points : {}".format(len(ph_silac_up.term_name.unique())))

ph_silac_up.require_n_sig(
    index='term_name',
    columns='sample_id',
    n_sig=3,
    inplace=True
)

ph_silac_up_copy = ph_silac_up.copy()
print("Number of terms after filtering base on minimum time points : {}".format(len(ph_silac_up_copy.term_name.unique())))

fig = ph_silac_up_copy.heatmap(figsize=(4, 24));
fig.savefig('ph_silac.png', dpi=300, bbox_inches='tight')

ph_silac_up.remove_redundant(
    threshold=.7,
    level='sample',
    inplace=True,
    sort_by='combined_score'
)

ph_silac_up.remove_redundant(
    threshold=.7,
    level='dataframe',
    inplace=True,
    sort_by='combined_score'
)

print("Number of genes before : {}".format(len(ph_silac_up_copy.all_genes_from_df())))
print("Number of genes after : {}".format(len(ph_silac_up.all_genes_from_df())))

```

```

Number of terms before filtering base on minimum time points : 560
Number of terms after filtering base on minimum time points : 83
Number of rows went from 83 to 30
Number of rows went from 30 to 17
Number of genes before : 570

```

Number of genes after : 550

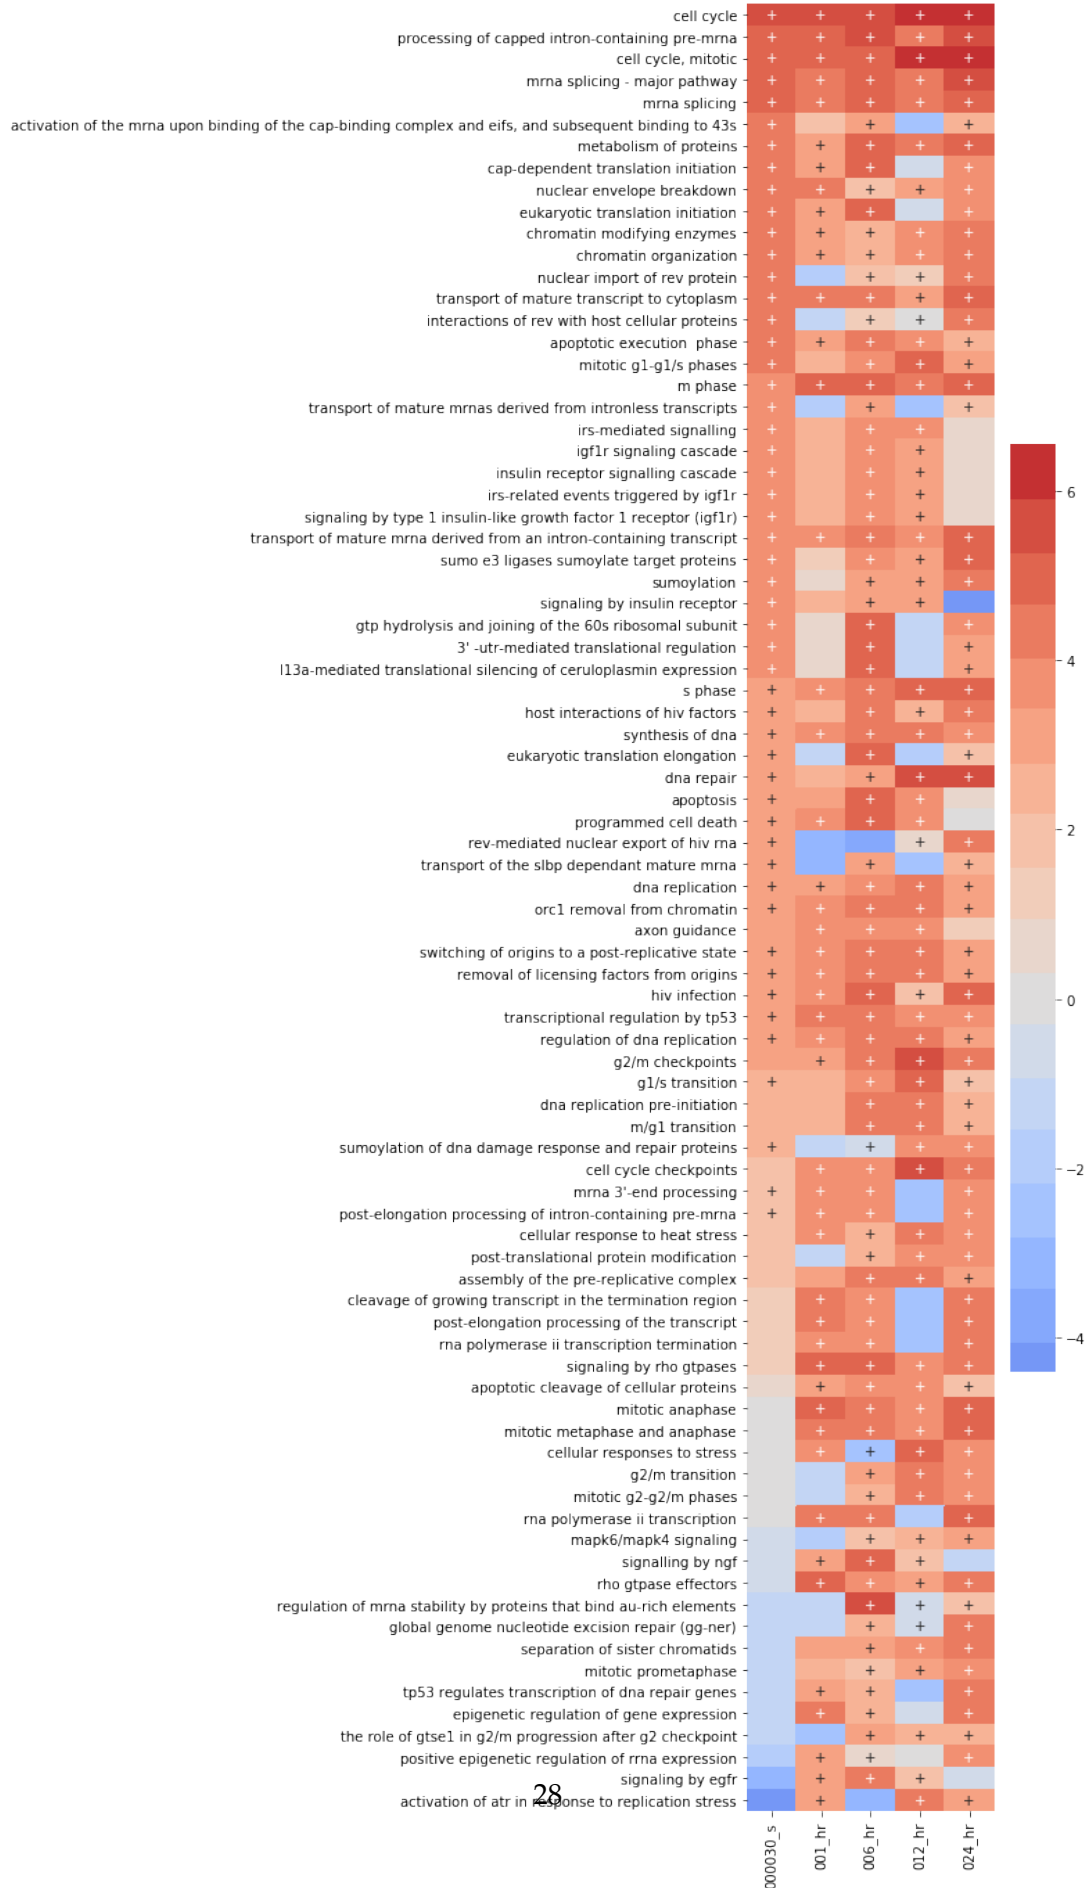

```
[23]: fig = ph_silac_up.heatmap(
    convert_to_log=False,
    cluster_by_set=False,
    cluster_row=False,
    values='combined_score',
    annotate_sig=True,
    div_colors=True,
    linewidths=.005,
    figsize=(4,8)
);
fig.savefig('ph_silac_slimmed.png', dpi=300, bbox_inches='tight')
```

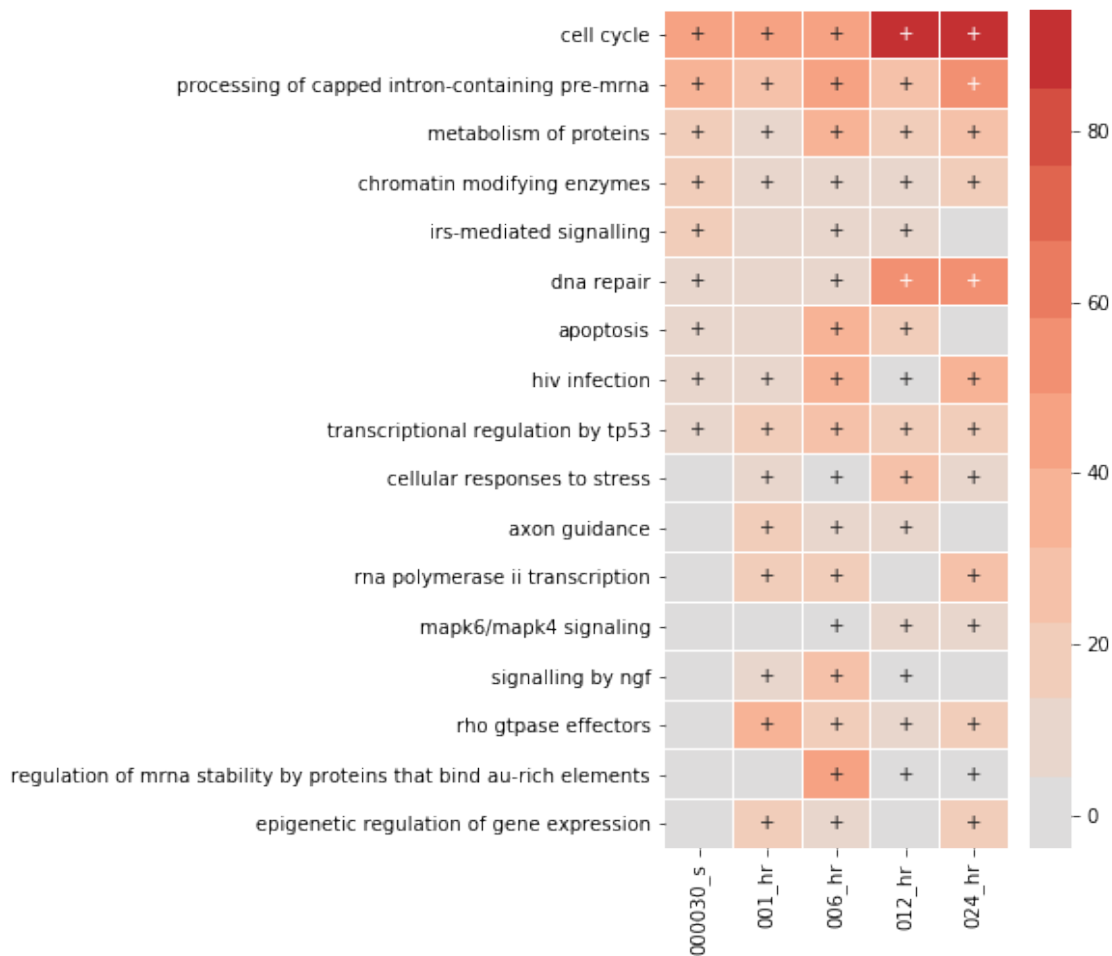

```
[24]: # note that we can still get back terms that were compressed
ph_silac_up_copy.show_terms_below(
    'cell cycle',
    threshold=.7,
```

```
    remove_subset=True
).heatmap(
    figsize=(3, 12),
    cluster_by_set=False,
    linewidths=0.01,
);
```

Number of rows went from 83 to 17

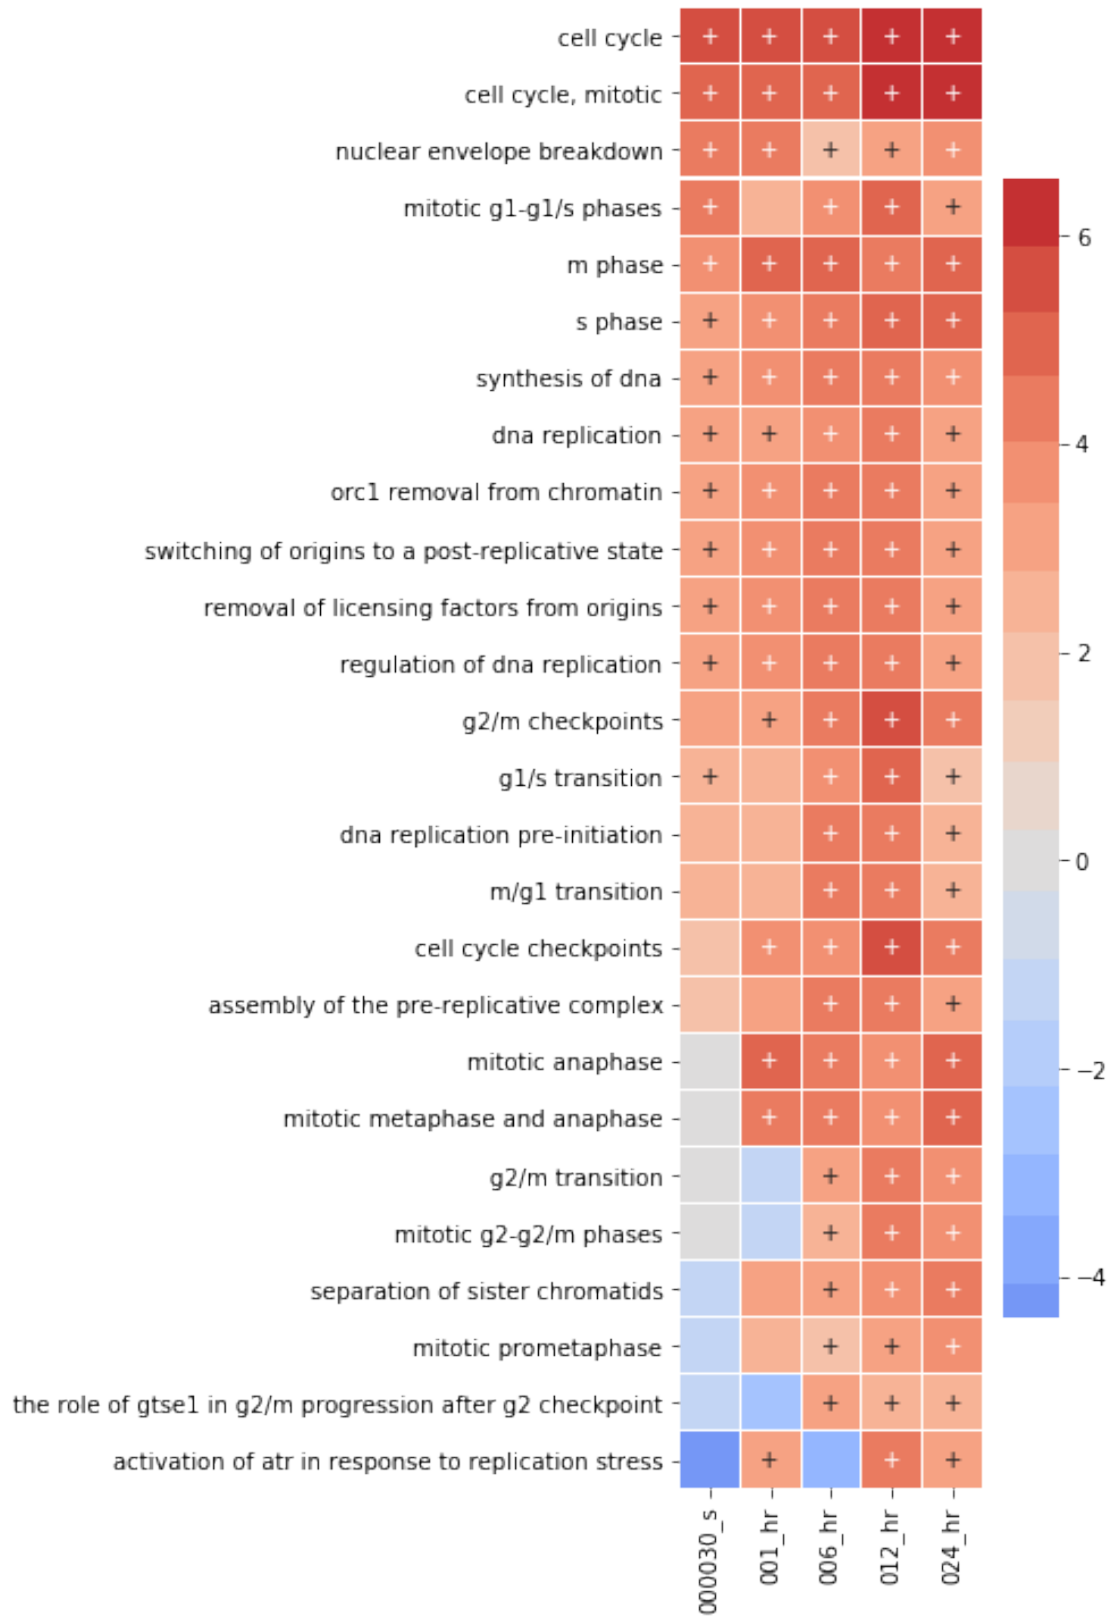



```
[25]: term_net, mol_net = create_subnetwork(
    ph_silac_up,
    network=network,
    save_name='time_series_agn',
    use_cytoscape=True,
    use_fdr=True, use_threshold=True, min_edges=25, scale=150
)
for i in ph_silac_up.term_name.unique():
    if i not in term_net.nodes:
        print(i)
```

Creating ontology network

```

└─
└─-----
ConnectionRefusedError                                Traceback (most recent call
└─last)

~\miniconda3\envs\magine_37\lib\site-packages\urllib3\connection.py in
└─_new_conn(self)
    158             conn = connection.create_connection(
--> 159                 (self._dns_host, self.port), self.timeout,
└─**extra_kw)
    160

~\miniconda3\envs\magine_37\lib\site-packages\urllib3\util\connection.py
└─in create_connection(address, timeout, source_address, socket_options)
    79         if err is not None:
---> 80             raise err
    81

~\miniconda3\envs\magine_37\lib\site-packages\urllib3\util\connection.py
└─in create_connection(address, timeout, source_address, socket_options)
    69             sock.bind(source_address)
---> 70             sock.connect(sa)
    71             return sock

ConnectionRefusedError: [WinError 10061] No connection could be made
└─because the target machine actively refused it
```

During handling of the above exception, another exception occurred:

```

NewConnectionError                                Traceback (most recent call
↳last)

~\miniconda3\envs\magine_37\lib\site-packages\urllib3\connectionpool.py
↳in urlopen(self, method, url, body, headers, retries, redirect,
↳assert_same_host, timeout, pool_timeout, release_conn, chunked, body_pos,
↳**response_kw)
    599                                     body=body,
↳headers=headers,
--> 600                                     chunked=chunked)
    601

~\miniconda3\envs\magine_37\lib\site-packages\urllib3\connectionpool.py
↳in _make_request(self, conn, method, url, timeout, chunked,
↳**httplib_request_kw)
    353         else:
--> 354             conn.request(method, url, **httplib_request_kw)
    355

~\miniconda3\envs\magine_37\lib\http\client.py in request(self, method,
↳url, body, headers, encode_chunked)
    1228         """Send a complete request to the server."""
-> 1229         self._send_request(method, url, body, headers,
↳encode_chunked)
    1230

~\miniconda3\envs\magine_37\lib\http\client.py in _send_request(self,
↳method, url, body, headers, encode_chunked)
    1274         body = _encode(body, 'body')
-> 1275         self.endheaders(body, encode_chunked=encode_chunked)
    1276

~\miniconda3\envs\magine_37\lib\http\client.py in endheaders(self,
↳message_body, encode_chunked)
    1223         raise CannotSendHeader()
-> 1224         self._send_output(message_body,
↳encode_chunked=encode_chunked)
    1225

```

```

~\miniconda3\envs\magine_37\lib\http\client.py in _send_output(self,
↳message_body, encode_chunked)
    1015         del self._buffer[:]
-> 1016         self.send(msg)
    1017

```

```

~\miniconda3\envs\magine_37\lib\http\client.py in send(self, data)
    955         if self.auto_open:
--> 956             self.connect()
    957         else:

```

```

~\miniconda3\envs\magine_37\lib\site-packages\urllib3\connection.py in
↳connect(self)
    180     def connect(self):
--> 181         conn = self._new_conn()
    182         self._prepare_conn(conn)

```

```

~\miniconda3\envs\magine_37\lib\site-packages\urllib3\connection.py in
↳_new_conn(self)
    167         raise NewConnectionError(
--> 168             self, "Failed to establish a new connection: %s" % e)
    169

```

```

NewConnectionError: <urllib3.connection.HTTPConnection object at
↳0x000001D71B658898>: Failed to establish a new connection: [WinError 10061] No
↳connection could be made because the target machine actively refused it

```

During handling of the above exception, another exception occurred:

```

MaxRetryError                                Traceback (most recent call
↳last)

```

```

~\miniconda3\envs\magine_37\lib\site-packages\requests\adapters.py in
↳send(self, request, stream, timeout, verify, cert, proxies)
    448         retries=self.max_retries,
--> 449         timeout=timeout
    450     )

```

```

~\miniconda3\envs\magine_37\lib\site-packages\urllib3\connectionpool.py
↳in urlopen(self, method, url, body, headers, retries, redirect,
↳assert_same_host, timeout, pool_timeout, release_conn, chunked, body_pos,
↳**response_kw)
    637             retries = retries.increment(method, url, error=e,
↳_pool=self,
    --> 638                 _stacktrace=sys.
↳exc_info()[2])
    639             retries.sleep()

```

```

~\miniconda3\envs\magine_37\lib\site-packages\urllib3\util\retry.py in
↳increment(self, method, url, response, error, _pool, _stacktrace)
    398         if new_retry.is_exhausted():
    --> 399             raise MaxRetryError(_pool, url, error or
↳ResponseError(cause))
    400

```

```

MaxRetryError: HTTPConnectionPool(host='localhost', port=1234): Max
↳retries exceeded with url: /v1/styles/visualproperties (Caused by
↳NewConnectionError('<urllib3.connection.HTTPConnection object at
↳0x000001D71B658898>: Failed to establish a new connection: [WinError 10061] No
↳connection could be made because the target machine actively refused it'))

```

During handling of the above exception, another exception occurred:

```

ConnectionError                                Traceback (most recent call
↳last)

```

```

<ipython-input-25-3897a1d095d0> in <module>
    4     save_name='time_series_agn',
    5     use_cytoscape=True,
----> 6     use_fdr=True, use_threshold=True, min_edges=25, scale=150
    7 )
    8 for i in ph_silac_up.term_name.unique():

```

```

E:\PycharmProjects\PycharmProjects\Magine\magine\networks\annotated_set.
↳py in create_subnetwork(df, network, terms, save_name, draw_png,
↳remove_isolated, use_cytoscape, merge, out_dir, use_threshold, use_fdr,
↳min_edges, scale)
    310         if use_cytoscape:
    311             from magine.networks.visualization.cytoscape import
↳RenderModel

```

```

--> 312         rm = RenderModel(term_g, layout='force-directed')
313         rm.visualize_by_list_of_time(labels,
314                                     prefix=save_name,

E:
↪\PycharmProjects\PycharmProjects\Magine\magine\networks\visualization\cytoscape.
↪py in __init__(self, graph, layout, style)
76
77         self.graph = graph
---> 78         self.cy = CyRestClient()
79         self.cy.session.delete()
80         self.cy.layout2 = LayoutClient()

E:
↪\PycharmProjects\PycharmProjects\py2cytoscape\py2cytoscape\data\cyrest_client.
↪py in __init__(self, ip, port, version)
17
18         self.network = NetworkClient(self.__url)
---> 19         self.style = StyleClient(self.__url)
20         self.layout = LayoutClient(self.__url)
21         self.edgebundling = EdgeBundlingClient(self.__url)

E:
↪\PycharmProjects\PycharmProjects\py2cytoscape\py2cytoscape\data\style_client.
↪py in __init__(self, url)
14         self.__url_apply = url + 'apply/styles/'
15
---> 16         self.vps = VisualProperties(url)
17
18         def create(self, name=None, original_style=None):

E:
↪\PycharmProjects\PycharmProjects\py2cytoscape\py2cytoscape\data\style_client.
↪py in __init__(self, url)
75         def __init__(self, url):
76             self.__url = url + 'styles/visualproperties'
---> 77             self.__convert_to_dict()
78
79         def __convert_to_dict(self):

```

```

E:
↳\PycharmProjects\PycharmProjects\py2cytoscape\py2cytoscape\data\style_client.
↳py in __convert_to_dict(self)
    78
    79     def __convert_to_dict(self):
---> 80         vps = requests.get(self.__url).json()
    81         vp_dict = {}
    82         node_vps = []

~\miniconda3\envs\magine_37\lib\site-packages\requests\api.py in
↳get(url, params, **kwargs)
    73
    74     kwargs.setdefault('allow_redirects', True)
---> 75     return request('get', url, params=params, **kwargs)
    76
    77

~\miniconda3\envs\magine_37\lib\site-packages\requests\api.py in
↳request(method, url, **kwargs)
    58     # cases, and look like a memory leak in others.
    59     with sessions.Session() as session:
---> 60         return session.request(method=method, url=url, **kwargs)
    61
    62

~\miniconda3\envs\magine_37\lib\site-packages\requests\sessions.py in
↳request(self, method, url, params, data, headers, cookies, files, auth,
↳timeout, allow_redirects, proxies, hooks, stream, verify, cert, json)
    531         }
    532         send_kwargs.update(settings)
--> 533         resp = self.send(prepare_request(self, url, method, params, data, headers, cookies, files, auth,
    534                                     timeout, allow_redirects, proxies, hooks, stream, verify, cert, json),
    535                             **send_kwargs)
    536         return resp

~\miniconda3\envs\magine_37\lib\site-packages\requests\sessions.py in
↳send(self, request, **kwargs)
    644
    645     # Send the request
--> 646     r = adapter.send(request, **kwargs)
    647
    648     # Total elapsed time of the request (approximately)

```

```

~\miniconda3\envs\magine_37\lib\site-packages\requests\adapters.py in
↳ send(self, request, stream, timeout, verify, cert, proxies)
    514             raise SSLError(e, request=request)
    515
--> 516             raise ConnectionError(e, request=request)
    517
    518         except ClosedPoolError as e:

```

```

    ConnectionError: HTTPConnectionPool(host='localhost', port=1234): Max
↳ retries exceeded with url: /v1/styles/visualproperties (Caused by
↳ NewConnectionError('<urllib3.connection.HTTPConnection object at
↳ 0x000001D71B658898>: Failed to establish a new connection: [WinError 10061] No
↳ connection could be made because the target machine actively refused it'))

```

```
[21]: create_gif('time_series_agn', tps, 'time_series_agn')
```

```

↳ -----

```

```

KeyboardInterrupt                                Traceback (most recent call
↳ last)

```

```

<ipython-input-21-d45f88c5bf26> in <module>
----> 1 create_gif('time_series_agn', tps, 'time_series_agn')

```

```

<ipython-input-19-35fad6325ce4> in create_gif(prefix, timepoints,
↳ save_name)

```

```

    44     f_names = ["{}_{}.png".format(prefix, i) for i in tps]
    45     for i,j in zip(f_names, tps):
--> 46         trip_photo(i, j)
    47
    48     kargs = {'duration': 8 / len(f_names)}

```

```

<ipython-input-19-35fad6325ce4> in trip_photo(im_location, title)
    36     out = im_location.replace('.png', '_formatted.png')
    37     out2 = im_location.replace('.png', '_formatted.svg')
--> 38     plt.savefig(out, dpi=1000, bbox_inches='tight', transparent=True)
    39     plt.savefig(out2, bbox_inches='tight', transparent=True)
    40     plt.close()

```

```

~\miniconda3\envs\magine_37\lib\site-packages\matplotlib\pyplot.py in
↳ savefig(*args, **kwargs)

```

```

714 def savefig(*args, **kwargs):
715     fig = gcf()
--> 716     res = fig.savefig(*args, **kwargs)
717     fig.canvas.draw_idle() # need this if 'transparent=True' to
↵reset colors
718     return res

```

```

~\miniconda3\envs\magine_37\lib\site-packages\matplotlib\figure.py in
↵savefig(self, fname, transparent, **kwargs)
2178         self.patch.set_visible(frameon)
2179
-> 2180         self.canvas.print_figure(fname, **kwargs)
2181
2182         if frameon:

```

```

~\miniconda3\envs\magine_37\lib\site-packages\matplotlib\backend_bases.
↵py in print_figure(self, filename, dpi, facecolor, edgecolor, orientation,
↵format, bbox_inches, **kwargs)
2080             orientation=orientation,
2081             bbox_inches_restore=_bbox_inches_restore,
-> 2082             **kwargs)
2083         finally:
2084             if bbox_inches and restore_bbox:

```

```

↵
↵~\miniconda3\envs\magine_37\lib\site-packages\matplotlib\backends\backend_agg.
↵py in print_png(self, filename_or_obj, metadata, pil_kwargs, *args, **kwargs)
525
526         else:
--> 527             FigureCanvasAgg.draw(self)
528             renderer = self.get_renderer()
529             with cbook._setattr_cm(renderer, dpi=self.figure.dpi), \

```

```

↵
↵~\miniconda3\envs\magine_37\lib\site-packages\matplotlib\backends\backend_agg.
↵py in draw(self)
386         self.renderer = self.get_renderer(cleared=True)
387         with RendererAgg.lock:
--> 388             self.figure.draw(self.renderer)
389             # A GUI class may be need to update a window using this
↵draw, so
390             # don't forget to call the superclass.

```



```

~\miniconda3\envs\magine_37\lib\site-packages\matplotlib\artist.py in
↳ draw_wrapper(artist, renderer, *args, **kwargs)
    36             renderer.start_filter()
    37
---> 38             return draw(artist, renderer, *args, **kwargs)
    39         finally:
    40             if artist.get_agg_filter() is not None:

```

```

~\miniconda3\envs\magine_37\lib\site-packages\matplotlib\figure.py in
↳ draw(self, renderer)
    1707         self.patch.draw(renderer)
    1708         mimage._draw_list_compositing_images(
-> 1709             renderer, self, artists, self.suppressComposite)
    1710
    1711         renderer.close_group('figure')

```

```

~\miniconda3\envs\magine_37\lib\site-packages\matplotlib\image.py in
↳ _draw_list_compositing_images(renderer, parent, artists, suppress_composite)
    133     if not_composite or not has_images:
    134         for a in artists:
--> 135             a.draw(renderer)
    136     else:
    137         # Composite any adjacent images together

```

```

~\miniconda3\envs\magine_37\lib\site-packages\matplotlib\artist.py in
↳ draw_wrapper(artist, renderer, *args, **kwargs)
    36             renderer.start_filter()
    37
---> 38             return draw(artist, renderer, *args, **kwargs)
    39         finally:
    40             if artist.get_agg_filter() is not None:

```

```

~\miniconda3\envs\magine_37\lib\site-packages\matplotlib\axes\_base.py
↳ in draw(self, renderer, inframe)
    2643         renderer.stop_rasterizing()
    2644
-> 2645         mimage._draw_list_compositing_images(renderer, self, artists)
    2646
    2647         renderer.close_group('axes')

```

```

~\miniconda3\envs\magine_37\lib\site-packages\matplotlib\image.py in
↳ _draw_list_compositing_images(renderer, parent, artists, suppress_composite)
    133     if not_composite or not has_images:
    134         for a in artists:
--> 135             a.draw(renderer)
    136     else:
    137         # Composite any adjacent images together

```

```

~\miniconda3\envs\magine_37\lib\site-packages\matplotlib\artist.py in
↳ draw_wrapper(artist, renderer, *args, **kwargs)
    36         renderer.start_filter()
    37
---> 38         return draw(artist, renderer, *args, **kwargs)
    39     finally:
    40         if artist.get_agg_filter() is not None:

```

```

~\miniconda3\envs\magine_37\lib\site-packages\matplotlib\image.py in
↳ draw(self, renderer, *args, **kwargs)
    617     else:
    618         im, l, b, trans = self.make_image(
--> 619             renderer, renderer.get_image_magnification())
    620         if im is not None:
    621             renderer.draw_image(gc, l, b, im)

```

```

~\miniconda3\envs\magine_37\lib\site-packages\matplotlib\image.py in
↳ make_image(self, renderer, magnification, unsampled)
    872     return self._make_image(
    873         self._A, bbox, transformed_bbox, self.axes.bbox,
↳ magnification,
--> 874         unsampled=unsampled)
    875
    876     def _check_unsampled_image(self, renderer):

```

```

~\miniconda3\envs\magine_37\lib\site-packages\matplotlib\image.py in
↳ _make_image(self, A, in_bbox, out_bbox, clip_bbox, magnification, unsampled,
↳ round_to_pixel_border)
    505
    506         #resample rgb channels
--> 507         A = _rgb_to_rgba(A[... , :3])
    508         _image.resample(
    509             A, output, t,

```

```

~\miniconda3\envs\magine_37\lib\site-packages\matplotlib\image.py in _
↳ _rgb_to_rgba(A)
    167     """
    168     rgba = np.zeros((A.shape[0], A.shape[1], 4), dtype=A.dtype)
--> 169     rgba[:, :, :3] = A
    170     if rgba.dtype == np.uint8:
    171         rgba[:, :, 3] = 255

```

KeyboardInterrupt:

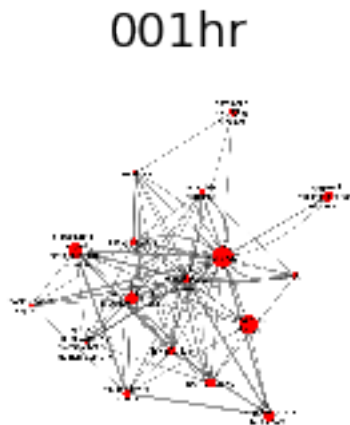

```

[:]: nx.set_node_attributes(term_net, 'red', 'color')
vis.draw_cyjs(term_net, layout='cose-bilkent', spacingFactor=1.4)

```

### 3.1.5 Exploring terms outside canonical

Since enrichment analysis is performed over all terms in a gene set, some of the terms might not make sense in certain context. This could be due to genes being classified in multiple sets, bad assignment, or possible new biology. The time it takes to explore each term in understanding why it is enriched can be time consuming, which is perhaps why people disregard terms frequently. We decided to use MAGINE to explore one of these terms. HIV infection

```

[:]: reactome_only.sig.show_terms_below(
    'hiv infection',
    level='dataframe',
    threshold=.25,
    remove_subset=False
).heatmap(
    figsize=(6,16),
    linewidths=0.05, # cluster_by_set=True,
);

```

```
[ ]: reactome_only.sig.find_similar_terms('hiv infection', level='dataframe',
    ↪remove_subset=False )
```

Since HIV infection hijacks dna repair and regulates cell cycle, lets check to see if that explains why HIV infection is enriched.

```
[ ]: hits = [
    'cell cycle',
    'dna repair',
    'hiv infection'
]
subset = reactome_only.sig.loc[reactome_only.sig.term_name.isin(hits)].copy()

g_sets = [reactome_only.sig.term_to_genes(i) for i in hits]
create_venn3(*g_sets+hits);
plt.savefig('venn_hiv.png', dpi=450)
```

```
[ ]: hiv_only= g_sets[-1]
hiv_only.difference_update(g_sets[0]) # remove dna repair genes
hiv_only.difference_update(g_sets[1]) # removes cell cycle genes

exp_data.label_free.heatmap(
    hiv_only,
    cluster_row=True,
    subset_index='identifier',
    index='label',
    min_sig=1,
    linewidths=0.01
);
exp_data.ph_silac.heatmap(
    hiv_only,
    subset_index='identifier',
    index='label',
    cluster_row=True,
    rank_index=True,
    min_sig=1,
    figsize=(6, 16),
    linewidths=0.01
);
```

```
[ ]: term_net, mol_net = create_subnetwork(
    subset,
    network=network,
    save_name='hiv',
    use_cytoscape=False,
    use_fdr=True, use_threshold=True, min_edges=10
)
print(len(mol_net.edges))
print(len(mol_net.nodes))
```

```

[ ]: vis.draw_cyjs(term_net)
[ ]: term_to_gene = subset.term_to_genes_dict()

heatmap_by_terms(
    exp_data.label_free,
    convert_to_log=False,
    index='label',
    term_labels=list(term_to_gene.keys()),
    term_sets=list(term_to_gene.values()),
    div_colors=True,
    linewidths=0.01,
    min_sig=2,
    annotate_sig=True,
    cluster_col=False,
    figsize=(6,12),
    y_tick_labels=True
);
heatmap_by_terms(
    exp_data.ph_silac,
    convert_to_log=False,
    index='label',
    term_labels=list(term_to_gene.keys()),
    term_sets=list(term_to_gene.values()),
    div_colors=True,
    linewidths=0.01,
    min_sig=2,
    annotate_sig=True,
    cluster_col=False,
    figsize=(6,12),
    y_tick_labels=True
);

```

### 3.1.6 Exploring a subset of terms based on a keyword

```

[ ]: # Filter by terms
damage_terms = enrichment_array.sig.filter_based_on_words(['damage'])
print(len(damage_terms.all_genes_from_df()))
damage_terms.head(10)
damage_terms_all = damage_terms.filter_multi(category='ph_silac_both')
first_damage = damage_terms_all.filter_multi(sample_id='000030_s')
display(first_damage[cols].head(20))

fig = first_damage.heatmap(
    convert_to_log=False,
    cluster_by_set=False,
    annotate_sig=True,

```

```

    div_colors=True,
    linewidths=.01,
    num_colors=21,
    figsize=(3,5)
);
fig.savefig('dna_damage_terms_30s.png', dpi=300, bbox_inches='tight')

damage_terms.require_n_sig(inplace=True, columns='sample_id', n_sig=2)
damage_terms.remove_redundant(inplace=True, threshold=.5, level='sample')
fig = damage_terms.heatmap(
    convert_to_log=False,
    cluster_by_set=False,
    annotate_sig=True,
    div_colors=True,
    linewidths=.01,
    num_colors=21,
    figsize=(4,8)
);
fig.savefig('dna_damage_terms_all.png', bbox_inches='tight')

dna_gene_df = exp_data.subset(first_damage.all_genes_from_df())
dna_gene_df = dna_gene_df.loc[dna_gene_df.sample_id.isin(['000030_s'])]

dna_gene_df.sig.heatmap(
    index='label',
    rank_index=False,
    convert_to_log=True,
    annotate_sig=True,
    div_colors=True,
    linewidths=.01,
    num_colors=21,
    figsize=(2,22)
);

```

### 3.1.7 Exploring species of interest

```

[:]: g2_m = ['CDK1', 'CCNB1']
      cdk1_inhibitors = ['GADD45A', 'GADD45B', 'GADD45G', 'CDKN1A']

exp_data.species.heatmap(
    g2_m,
    index='label',
    subset_index='identifier',
    figsize=(4,8),
    linewidths=0.01,
    cluster_row=True,

```

```

    min_sig=1
);

exp_data.species.heatmap(
    cdk1_inhibitors,
    index='label',
    subset_index='identifier',
    figsize=(4, 4),
    linewidths=0.01,
    cluster_row=True,
    min_sig=1
);

```

```

[ ]: expand_neigh = net_sub.expand_neighbors(
    network=None,
    nodes=g2_m,
    downstream=True,
    upstream=True,
    max_dist=1,
    include_only=reactome_only.filter_multi(category=['label_free_up']).
    →term_to_genes('cell cycle'),
    add_interconnecting_edges=False,
)

expand_neigh = net_sub.paths_between_two_lists(
    reactome_only.filter_multi(category=['ph_silac_up']).term_to_genes('dna_
    →repair'),
    g2_m,
    max_length=3,
    include_only=reactome_only.filter_multi(category=['label_free_up']).
    →term_to_genes('cell cycle'),
    add_interconnecting_edges=True
)

print(len(expand_neigh.nodes))
print(len(expand_neigh.edges))
expand_neigh = utils.delete_disconnected_network(expand_neigh)
exp_data.label_free.heatmap(
    expand_neigh.nodes,
    subset_index='identifier',
    index='label',
    rank_index=False,
    cluster_row=True,
    min_sig=3,
    annotate_sig=True,
    linewidths=0.01
);

```

```
[ ]: #expand_neigh = utils.add_attribute_to_network(expand_neigh, g2_m, 'color',
→'red', 'white')
vis.draw_cyjs(
    expand_neigh, layout='dagre',
    spacingFactor=1.,
    nodeRepulsion=100, gravity=.1,
    rankDir='TB', nodeSep=5, rankSep=25, ranker='longest-path'
)
```

```
[ ]: expand_neigh = net_sub.paths_between_two_lists(
    reactome_only.filter_multi(category=['ph_silac_up']).term_to_genes('dna_
→repair'),
    g2_m,
    reverse=True,
    max_length=3,
    include_only=exp_data.species.sig,
    add_interconnecting_edges=False
)

expand_neigh = utils.delete_disconnected_network(expand_neigh)

print(len(expand_neigh.nodes))
print(len(expand_neigh.edges))
```

```
[ ]: vis.draw_cyjs(
    expand_neigh, layout='dagre',
    spacingFactor=1.,
    nodeRepulsion=100, gravity=.1,
    rankDir='TB', nodeSep=5, rankSep=25, ranker='longest-path'
)
```

```
[ ]: exp_data.ph_silac.heatmap(
    expand_neigh.nodes,
    subset_index='identifiant',
    index='label',
    rank_index=False,
    cluster_row=True,
    min_sig=2,
    linewidths=0.01
);

exp_data.label_free.heatmap(
    expand_neigh.nodes,
    subset_index='identifiant',
    index='label',
    rank_index=False,
    cluster_row=True,
    min_sig=2,
```



```

        linewidths=0.01
    );

[ ]: down_casp3 = net_sub.expand_neighbors(
    network=None,
    nodes=['CASP3'],
    upstream=False, downstream=True,
    max_dist=1,
    include_only=exp_data.label_free.sig.require_n_sig(index='label', n_sig=2).
    ↪id_list
)
down_casp3 = utils.delete_disconnected_network(down_casp3)
print(len(down_casp3.nodes))
print(len(down_casp3.edges))
exp_data.label_free.heatmap(
    down_casp3.nodes,
    subset_index='identifier', index='label',
    min_sig=2, linewidths=0.01,
    cluster_row=True
);

exp_data.label_free.require_n_sig(index='label', n_sig=2).heatmap(
    down_casp3.nodes, subset_index='identifier',
    #index='label',
    rank_index=True,
    figsize=(8, 2),
    index='sample_id', columns='label',
    min_sig=2, linewidths=0.01, cluster_row=False, cluster_col=False
);
plt.yticks(rotation=0)
plt.savefig('down_from_casp3.png', dpi=300, bbox_inches='tight')

[ ]: vis.draw_cyjs(down_casp3)

[ ]: def show_neighbors(node, df, upstream=True, downstream=False, max_dist=1,
    include_only=None, figsize=None):

    df_copy = df.copy()
    df_copy.require_n_sig(n_sig=1, inplace=True)

    neighbors = net_sub.expand_neighbors(
        network=None,
        nodes=[node],
        upstream=upstream,
        downstream=downstream,
        max_dist=max_dist,
        include_only=include_only
    )

```

```

neighbors = utils.delete_disconnected_network(neighbors)
s_name = 'node_{}.png'.format(node)
exporters.export_to_dot(neighbors, s_name, image_format='png',
→engine='circo')
display(Image(s_name, width=400))

g = df_copy.heatmap(
    sorted(neighbors.nodes),
    subset_index='identifier',
    index='label',
    min_sig=1,
    rank_index=True,
    linewidths=0.01,
    figsize=figsize
);

g.savefig('{}_heatmap.png'.format(node), bbox_inches='tight', dpi=300)
show_neighbors('CASP3', exp_data.label_free, False, True, max_dist=1,
    include_only=exp_data.label_free.sig.require_n_sig(n_sig=2).
→id_list)

```

```

[ ]: show_neighbors('BAX', exp_data.species, False, True, max_dist=1,
    include_only=exp_data.species.sig.require_n_sig(n_sig=1).id_list)

```

```

[ ]:

```

```

[ ]:

```
